# Supplementary material
Source: PubMed Central journal article supplement (PMC11446180)
Supplement: NIHMS2006343-supplement-supplemental.pdf [file NIHMS2006343-supplement-supplemental.pdf]

---

# The genetic architecture of biological age in nine human organ systems

---

In the format provided by the authors and unedited

---

## Table of contents

|    |                                                                                                    |
|----|----------------------------------------------------------------------------------------------------|
| 1  |                                                                                                    |
| 2  | <b>Supplementary Note 1: The definition of genomic loci, independent significant SNP, lead</b>     |
| 3  | <b>SNP, candidate SNP</b>                                                                          |
| 4  | <b>Supplementary Note 2: Sensitivity check analyses for the main GWAS of the nine BAGs</b>         |
| 5  | <b>using European ancestry</b>                                                                     |
| 6  | <b>Supplementary Note 3: The characteristics of genomic loci linked to the nine BAG</b>            |
| 7  | <b>Supplementary Note 4: Phenome-wide association query using the GWAS Atlas platform</b>          |
| 8  | <b>Supplementary Note 5: Additional analyses to elucidate the genetic signals across the nine</b>  |
| 9  | <b>BAGs</b>                                                                                        |
| 10 | <b>Supplementary Note 6: Supplementary Note 5: Sensitivity check analyses for the causality</b>    |
| 11 | <b>between the nine BAGs</b>                                                                       |
| 12 | <b>Supplementary Note 7: Additional details on the machine learning models used for</b>            |
| 13 | <b>computing the BAG and comparison with the literature</b>                                        |
| 14 | <b>Supplementary Figure 1: GWAS Manhattan plots for the brain BAG</b>                              |
| 15 | <b>Supplementary Figure 2: GWAS Manhattan plots for the cardiovascular BAG</b>                     |
| 16 | <b>Supplementary Figure 3: GWAS Manhattan plots for the eye BAG</b>                                |
| 17 | <b>Supplementary Figure 4: GWAS Manhattan plots for the hepatic BAG</b>                            |
| 18 | <b>Supplementary Figure 5: GWAS Manhattan plots for the immune BAG</b>                             |
| 19 | <b>Supplementary Figure 6: GWAS Manhattan plots for the metabolic BAG</b>                          |
| 20 | <b>Supplementary Figure 7: GWAS Manhattan plots for the musculoskeletal BAG</b>                    |
| 21 | <b>Supplementary Figure 8: GWAS Manhattan plots for the pulmonary BAG</b>                          |
| 22 | <b>Supplementary Figure 9: GWAS Manhattan plots for the renal BAG</b>                              |
| 23 | <b>Supplementary Figure 10: Bayesian colocalization analysis for the locus on chromosome 6</b>     |
| 24 | <b>between the hepatic and musculoskeletal BAGs</b>                                                |
| 25 | <b>Supplementary Figure 11: Exemplary genomic locus for each BAG in the nine human</b>             |
| 26 | <b>organ systems</b>                                                                               |
| 27 | <b>Supplementary Figure 12. Phenome-wide association query of the identified genomic loci in</b>   |
| 28 | <b>the GWAS Atlas platforms</b>                                                                    |
| 29 | <b>Supplementary Figure 13: Manhattan of and QQ plots for the four pulmonary features</b>          |
| 30 | <b>used to compute the pulmonary BAG</b>                                                           |
| 31 | <b>Supplementary Figure 14: Beta coefficients of the significant colocalization signal between</b> |
| 32 | <b>the pulmonary BAG and the four pulmonary features</b>                                           |
| 33 | <b>Supplementary Figure 15: Mendelian randomization sensitivity check for the hepatic BAG</b>      |
| 34 | <b>on the musculoskeletal BAG</b>                                                                  |
| 35 | <b>Supplementary Figure 16: Mendelian randomization sensitivity check for the</b>                  |
| 36 | <b>musculoskeletal BAG on the hepatic BAG</b>                                                      |
| 37 | <b>Supplementary Figure 17: Mendelian randomization sensitivity check for AD on the brain</b>      |
| 38 | <b>BAG</b>                                                                                         |
| 39 | <b>Supplementary Figure 18: Mendelian randomization sensitivity check for AD on the</b>            |
| 40 | <b>hepatic BAG</b>                                                                                 |
| 41 | <b>Supplementary Figure 19: Mendelian randomization sensitivity check for Crohn's disease</b>      |
| 42 | <b>on the hepatic BAG</b>                                                                          |
| 43 | <b>Supplementary Figure 20: Mendelian randomization sensitivity check for body weight on</b>       |
| 44 | <b>the immune BAG</b>                                                                              |
| 45 | <b>Supplementary Figure 21: Mendelian randomization sensitivity check for type 2 diabetes</b>      |
| 46 | <b>on the metabolic BAG</b>                                                                        |

- 47 **Supplementary Figure 22: Mendelian randomization sensitivity check for AD on the**  
48 **musculoskeletal BAG**
- 49 **Supplementary Figure 23: Mendelian randomization sensitivity check for IBD on the**  
50 **musculoskeletal BAG**
- 51 **Supplementary Figure 24: Mendelian randomization sensitivity check for PBC on the**  
52 **musculoskeletal BAG**
- 53 **Supplementary Figure 25: Mendelian randomization sensitivity check for weight on the**  
54 **musculoskeletal BAG**
- 55 **Supplementary Figure 26: Mendelian randomization sensitivity check for weight on the**  
56 **pulmonary BAG**
- 57 **Supplementary Figure 27: Mendelian randomization sensitivity check for AD on the renal**  
58 **BAG**
- 59 **Supplementary Figure 28: Mendelian randomization sensitivity check for weight on the**  
60 **renal BAG**
- 61 **Supplementary Figure 29: Mendelian randomization sensitivity check for the brain BAG**  
62 **on sleep duration**
- 63 **Supplementary Figure 30: Mendelian randomization sensitivity check for the**  
64 **cardiovascular BAG on triglycerides to lipids ratio in very large VLDL**
- 65 **Supplementary Figure 31: Mendelian randomization sensitivity check for the metabolic**  
66 **BAG on weight**
- 67 **Supplementary Figure 32: Mendelian randomization sensitivity check for the pulmonary**  
68 **BAG on weight**
- 69 **Supplementary Table 1: Heritability estimates using the GCTA software**
- 70 **Supplementary Table 2: The beta coefficient and its SE estimate from the full sample vs.**  
71 **the down-sampled brain BAG comparable sample**
- 72 **Supplementary Table 3: Genetic correlation analyses between the pulmonary BAG and the**  
73 **four features used to derive the BAG.**
- 74 **Supplementary Table 4: Selected 41 clinical traits for genetic correlation analyses**
- 75 **Supplementary Table 5: Genetic correlations analyses between the nine BAGs and**  
76 **longevity, household income, and telomere length**
- 77 **Supplementary Table 6: Causal analysis using the LCV method**
- 78 **Supplementary Table 7: Selected 17 clinical traits for Mendelian randomization analyses**

79 **Supplementary Note 1: The definition of genomic loci, independent significant SNP, lead**  
 80 **SNP, candidate SNP**

81 FUMA defined the significant independent SNPs, lead SNPs, candidate SNPs, and genomic risk  
 82 loci as follows (<https://fuma.ctglab.nl/tutorial#snp2gene>):

83 *Independent significant SNPs*

84 They are defined as SNPs with  $P \leq 5 \times 10^{-8}$  that are independent of each other at the user-defined  
 85  $r^2$  (set to 0.6 in the current study). FUMA further describes *candidate SNPs* as those in linkage  
 86 disequilibrium (LD) with independent significant SNPs. FUMA then queries each candidate SNP  
 87 in the GWAS Catalog to check whether any clinical traits have been reported to be associated with  
 88 previous GWAS studies. As mentioned in the main manuscript, this situation could result in  
 89 redundant associations due to high correlations among these candidate SNPs with the top lead SNP  
 90 or independent significant SNPs. We addressed this issue, as described in **Methods** in the main  
 91 manuscript, to ensure that only one SNP was taken into account for each genomic locus shown in  
 92 **Fig. 2a**.

93 *Lead SNPs*

94 Lead SNPs are defined as independent significant SNPs that are also independent of each other at  
 95  $r^2 < 0.1$ . If multiple independent significant SNPs are correlated at  $r^2 \geq 0.1$ , then the one with the  
 96 lowest individual  $P$ -value becomes the lead SNP. If  $r^2$  threshold is set to 0.1 for the independent  
 97 significant SNPs, then they would constitute the identical set as the lead SNPs by definition.  
 98 FUMA thus advises setting  $r^2$  to be 0.6 or higher. The current study used the threshold as 0.6 for  
 99  $r^2$ .

100 *Genomic risk loci*

101 FUMA defines genomic risk loci to include all independent signals physically close or overlapping  
 102 in a single locus. First, independent significant SNPs dependent on each other at  $r^2 \geq 0.1$  are  
 103 assigned to the same genomic risk locus. Then, independent significant SNPs with less than the  
 104 user-defined distance (250 kb by default) away from one another are merged into the same  
 105 genomic risk locus - the distance between two LD blocks of two independent significant SNPs is  
 106 the distance between the closest points from each LD block. Each locus is represented by the SNP  
 107 within the locus with the lowest  $P$ -value – the top lead SNP.

108  
 109 In FUMA, the users can adapt these parameters, but our current study used the default values  
 110 suggested by FUMA. FUMA employs a similar approach to other studies in the field when  
 111 considering linkage disequilibrium to annotate independent genetic signals. We will list two  
 112 studies for illustration purposes:

- 113 • In the very first large-scale UKBB brain imaging GWAS by Elliot and colleagues<sup>1</sup>, the  
 114 authors used the following procedure to annotate independent genomic loci: “For each  
 115 GWAS we first identified all variants with  $-\log_{10}(P) > 7.5$ . We applied an iterative process  
 116 that starts by identifying the most strongly associated variant, storing it as a lead variant,  
 117 and then removing it, and all variants within 0.25 cM from the list of variants (equivalent  
 118 to approximately 250 kb in physical distance). The process was then repeated until the list  
 119 of variants was empty. We applied this process to each GWAS using two filters on MAF:  
 120 (a) MAF > 0.1%, and (b) MAF > 1%. We grouped associated lead SNPs across phenotypes  
 121 into clusters. This process first grouped SNPs within 0.25 cM of each other, and this mostly



122 produced sensible clusters, but some hand curation was used to merge or split clusters  
123 based on visual inspection of cluster plots and levels of linkage disequilibrium between  
124 SNPs. For some clusters in Extended Data Table 1, we report coding SNPs that were found  
125 to be in high linkage disequilibrium with the lead SNPs.” In their approach, they defined  
126 the gnomonic loci as clusters, and using the coding SNPs in high LD with the lead SNPs to  
127 represent the loci.

128 • An additional example is from the study by Kurki et al. 2023<sup>2</sup> using the FinnGen data. The  
129 authors employed Bayesian-based fine-mapping methodologies (e.g., SuSiE) to enhance  
130 the definition of independent genetic signals, which they termed "independent hits" in their  
131 publication. Specifically, they stated: “To define independent signals within a locus, we  
132 utilized fine-mapping results. For each locus, we report the credible set as an independent  
133 hit if it represents a primary strongest signal with lead  $P < 5 \times 10^{-8}$ . For secondary hits, we  
134 required genome-wide significance and log Bayes factor (BF)  $> 2$ . The BF filtering was  
135 necessary because SuSiE sometimes reports multiple credible sets for a single strong signal  
136 but this is indicated in SuSiE as a low BF (the model does not improve by adding another  
137 signal in the region that is not an independent signal).”

138 In general, we consider these approaches to be equally effective in managing linkage  
139 disequilibrium, provided that the methodology is clearly outlined in a transparent manner.

140 **Supplementary Note 2: Sensitivity check analyses for the main GWAS of the nine BAGs**  
 141 **using European ancestry**

142 We fully considered linkage disequilibrium and only included the independent significant SNPs  
 143 in this sensitivity check analysis. We exemplified this analysis in the split-sample GWAS. We  
 144 first used the Plink *clump* command (*--clump-p1 0.00000005 --clump-p2 0.05 --clump-r2 0.60 --*  
 145 *clump-kb 250*) to define the independent significant SNPs for the split1 and split2 GWAS. We  
 146 then included all the unique independent significant SNPs in either of the two split GWASs. We  
 147 then calculated three statistics to scrutinize the concordance of the two split GWASs:

- 148 •  $r$ - $\beta$ : Pearson's  $r$  between the two sets of  $\beta$  coefficients from the two splits;
- 149 •  $C$ - $\beta$ : concordance rate of the sign of the  $\beta$  coefficients from the two splits – if the same  
 150 SNP exerts the same protective/risk effect between the two splits;
- 151 •  $P$ - $\beta$ : the difference between the two sets of  $\beta$  coefficients from the two splits – if the two  
 152 sets of  $\beta$  coefficients (mean) statistically differ.

153 The three metrics were calculated for sex-stratified, fastGWA, and non-European GWAS  
 154 sensitivity check analyses.

155  
 156 **Split-sample GWAS**  
 157 **P-values:**

158 In the split1 GWAS, we found 6, 28, 20, 117, 62, 160, 37, 40, and 127 independent significant  
 159 SNPs for the brain, cardiovascular, eye, hepatic, immune, metabolic, musculoskeletal,  
 160 pulmonary, and renal BAGs, and 5, 30, 21, 110, 55, 164, 45, 43, and 139 independent significant  
 161 SNPs in split2 GWAS.

162 For the brain BAG, we obtained an  $r$ - $\beta$  of -0.06 (P-value=0.84;  $N=11$ ), but the two sets of  
 163 coefficients did not statistically differ ( $P$ - $\beta=0.70$ ). All the 11 independent significant SNPs  
 164 showed the same direction of effect ( $C$ - $\beta=1$ ). The low  $r$ - $\beta$  was likely due to small sample sizes in  
 165 the brain BAG. For all the other 8 BAGs, we obtained significantly high  $r$ - $\beta$  estimates ( $0.90 < r$ -  
 166  $\beta < 0.99$ ; P-value  $< 1 \times 10^{-19}$ ). The two sets of coefficients did not statistically differ ( $P$ - $\beta > 0.48$ ). All  
 167 independent significant SNPs showed the same direction of effect ( $C$ - $\beta=1$ ). Detailed results of  
 168 these SNPs are presented in **Supplementary Source Data 2** for split-sample GWAS. The scatter  
 169 plot of the independent SNPs'  $\beta$  coefficients is shown below.

170  
 171 **Sex-stratified GWAS**

172 In the female GWAS, we found 7, 24, 23, 286, 116, 142, 153, 30, and 131 independent  
 173 significant SNPs for the brain, cardiovascular, eye, hepatic, immune, metabolic, musculoskeletal,  
 174 pulmonary, and renal BAGs, and 7, 38, 22, 126, 275, 286, 42, 71, and 167 independent  
 175 significant SNPs in the male GWAS.

176 For the brain BAG, we obtained an  $r$ - $\beta$  of -0.869 (P-value= $5.29 \times 10^{-5}$ ,  $N=14$ ), but the two  
 177 sets of coefficients did not statistically differ ( $P$ - $\beta=0.66$ ). 13 out of the 14 independent significant  
 178 SNPs showed the same direction of effect ( $C$ - $\beta=0.93$ ). The one independent significant SNP  
 179 (rs1634777) that had the opposite  $\beta$  sign in males compared to females was because the  $\beta$   
 180 coefficient was close to 0 ( $\beta=-0.000417162$ ) and was not statistically significant (P-value=0.99).  
 181 For all the other 8 BAGs, we obtained significantly high  $r$ - $\beta$  estimates ( $0.30 < r$ - $\beta < 0.96$ ; P-  
 182 value  $< 2.57 \times 10^{-7}$ ). The two sets of coefficients did not statistically differ ( $P$ - $\beta > 0.40$ ), except for  
 183 the immune BAG ( $P$ - $\beta=0.013$ ). Most independent significant SNPs showed the same direction of  
 184 effect ( $C$ - $\beta > 0.89$ ), except for the immune (0.54) and musculoskeletal BAGs (0.70). Detailed

185 results of these SNPs are presented in **Supplementary Source Data 3** for sex-stratified GWAS.  
186 The scatter plot of the independent SNPs'  $\beta$  coefficients is shown below.

187

### 188 **fastGWA vs PLINK GWAS**

189 In the PLINK GWAS, we found 27, 124, 69, 289, 217, 422, 147, 272, and 331 independent  
190 significant SNPs for the brain, cardiovascular, eye, hepatic, immune, metabolic, musculoskeletal,  
191 pulmonary, and renal BAGs, and 27, 124, 69, 292, 218, 422, 148, 269, and 333 independent  
192 significant SNPs in fastGWA GWAS.

193 For all the nine BAGs, we found almost perfect concordance between the PLINK and  
194 fastGWA GWASs using the three proposed metrics ( $r\text{-}\beta=1$ ;  $C\text{-}\beta=1$ ;  $P\text{-}\beta=1$ ). Detailed results of  
195 these SNPs are presented in **Supplementary Source Data 4** for method-specific GWAS. The  
196 scatter plot of the independent SNPs'  $\beta$  coefficients is shown below.

197

### 198 **European vs. non-European GWAS**

199 In the European GWAS, we found 27, 124, 69, 289, 217, 422, 147, 272, and 331 independent  
200 significant SNPs for the brain, cardiovascular, eye, hepatic, immune, metabolic, musculoskeletal,  
201 pulmonary, and renal BAGs, and 0, 2, 1, 16, 2, 23, 1, 1, and 35 independent significant SNPs in  
202 non-European GWAS (with much smaller sample sizes).

203 For all the nine BAGs, we found a high concordance between the European and non-  
204 European GWASs using the three proposed metrics ( $0.85 < r\text{-}\beta < 0.95$ ;  $0.89 < C\text{-}\beta < 1$ ). The two  
205 sets of  $\beta$  coefficients did not significantly differ ( $P\text{-}\beta > 0.12$ ). Detailed results of these SNPs are  
206 presented in **Supplementary Source Data 5** for ancestry-specific GWAS. The scatter plot of the  
207 independent SNPs'  $\beta$  coefficients is shown below.

208

209 **Supplementary Note 3: The characteristics of genomic loci linked to the nine BAG.**

210 Certain genomic loci exhibited unique associations with individual organs, whereas others  
211 displayed connections to multiple organ BAGs in close genomic proximity based on their  
212 cytogenetic position. For instance, the locus on chromosome 6 associated with the hepatic  
213 (rs62401887, position: 24416482 at 6p22.3), immune (rs80215559, position: 25918225 at  
214 6p22.3), metabolic (rs79220007, position: 26098474 at 6p22.2), musculoskeletal (rs2744575,  
215 position: 24494975 at 6p22.3), pulmonary (rs411535, position: 22061040 at 6p22.3), and renal  
216 BAGs (rs55925606, position: 25878848 at 6p22.2) was close with each other on the human  
217 genome. Bayesian colocalization<sup>3</sup> analyses supported two distinct causal SNP within this locus  
218 with the liver and musculoskeletal BAGs. Our results showed a posterior possibility (PP) of two  
219 distinct causal variants (PP.H3.ABF=0.744) or one shared causal variant (PP.H4.ABF=0.256)  
220 associated with both traits in the *GPLDI* gene, although the PP.H4.ABF hypothesis did not  
221 achieve the suggested threshold (>0.8)<sup>3</sup>. Detailed results are presented in **Supplementary Figure**  
222 **10**. However, note that these loci on chromosome 6 are near the major histocompatibility  
223 complex (MHC) region; further dedicated analyses are needed to understand the underlying  
224 genetics across different BAGs (e.g., pleiotropy).

225 Many of these loci were mapped to protein-encoding genes and provided functional  
226 insights. For example, the top lead SNP (rs62401887 at 6p22.3) within the locus of the hepatic  
227 BAG was mapped to the *MRS2* gene by position (with a deleterious score of 14.89) and  
228 expression quantitative trait loci (eQTL, P-value=1.09x10<sup>-10</sup>), which enables magnesium ion  
229 transmembrane transporter activity. We illustrate the regional Manhattan plot for the genomic  
230 locus with the highest significance for each organ BAG in **Supplementary Figure 11**. For  
231 instance, the brain BAG exhibited a highly significant locus (top lead SNP: rs371185851 at  
232 17q21.31) with multiple protein-encoding genes, including the widely recognized *MAPT* gene  
233 encoding tau protein associated with neurodegenerative diseases, such as Alzheimer's disease  
234 (AD)<sup>4</sup>. Moreover, the SNPs within this locus included enhancers and transcription start sites  
235 specific to brain tissue chromatin states, highlighting their functional relevance in brain-related  
236 processes (**Supplementary Figure 11a**).

237  
238

239 **Supplementary Note 4: Phenome-wide association query using the GWAS Atlas platform**

240 To comprehensively encompass the genetic landscape reported in previous literature, we  
241 comparatively conducted a phenome-wide association query using the GWAS Atlas platform  
242 (<https://atlas.ctglab.nl/PheWAS>). We applied the same P-value threshold search criteria as those  
243 used in the EMBL-EBI GWAS Catalog ( $P\text{-value} < 1 \times 10^{-5}$ ). These findings are presented as a  
244 supplementary search to complement the results shown in **Fig. 2a**. The details of this  
245 comparative search are presented in **Supplementary Source Data 7**.

246 It's important to note that the two platforms may exhibit variations in their curated  
247 GWAS datasets, the genome build versions utilized, and the specific P-value thresholds set for  
248 their search analyses by default. We tried our best to harmonize the query criteria. Hence, this  
249 comparative search was not exhaustive, and the results may differ. Rather, we intend to offer a  
250 broad overview of the two platforms commonly employed for phenome-wide association studies  
251 (PheWAS). Given the rapid updates in GWAS summary statistics in the field, it's worth  
252 mentioning that this comparative search was originally conducted on October 23, 2023, and  
253 revised on January 13, 2024, based on the reviewer's comments. The results from the GWAS  
254 Atlas are shown in the figure below.

255 In the GWAS Atlas platform, we identified 8,576 significant associations between the  
256 identified loci in our GWAS and clinical traits. The genomic loci associated with the brain BAG  
257 exhibited the highest proportion of associations (109 out of 308) with traits related to the brain.  
258 The brain BAG loci were also largely linked to many other traits related to other organ systems,  
259 evidencing inter-organ connections, including metabolic ( $N=78/308$ ), lifestyle factor ( $N=13/308$ ),  
260 neurodegenerative traits ( $N=5/308$ ), and immune ( $N=35/308$ ). For the eye BAG loci, most  
261 associations were found in the musculoskeletal ( $N=139/279$ ), eye ( $N=14/279$ ), and mental traits  
262 ( $N=19/279$ ), among many others.

263 For the seven body organ systems, among the loci associated with the cardiovascular  
264 BAG, most associations were observed with musculoskeletal traits ( $N=249/611$ ) and  
265 cardiovascular traits (166/611). 29 out of 1009 associations were related to hepatic traits (e.g.,  
266 blood protein, cirrhosis, and bilirubin) for the hepatic BAG loci. Among the loci associated with  
267 the immune BAG, abundant associations were found enriched in immune ( $N=467/1062$ ) traits.  
268 For the metabolic BAG loci, most associations were observed in metabolic traits ( $N=993/1990$ ).  
269 We found a significant intertwining of musculoskeletal systems with other organ systems in the  
270 GWAS Atlas platform. Details of the phenome-wide associations are presented in  
271 **Supplementary Source Data 7**.

272 **Supplementary Note 5: Additional analyses to elucidate the genetic signals across the nine**  
273 **BAGs**

274 It is widely recognized that the effect size of common genetic variants tends to increase as the  
275 allele frequency decreases. This “inverse relationship” was evidenced by our data using  
276 independent significant SNPs from the 9 BAGs (**Extended Data Figure 3**). We then  
277 hypothesized that the smaller sample sizes of the brain and eye BAGs enabled us to detect  
278 significant variants with a relatively higher allele frequency but could not identify the SNPs with  
279 a relatively lower allele frequency associated with the body organ BAGs. This relationship  
280 persisted by subsampling the population of other BAGs to that of the brain BAGs, which is  
281 presented in **Extended Data Figure 2c**. As expected, the  $\beta$  coefficients derived from the whole  
282 samples ( $N > 10k$  for body organ BAGs) were not significantly different from the results using the  
283 brain-BAG comparable down-sampled samples ( $N = 30,108$ ) (**Supplementary Table 2**).

284 Another hypothesis is that the features used to compute the brain and eye BAGs – *in vivo*  
285 imaging features – are more heritable than those of the body-organ systems. We compared the  
286 genetic structure of the nine BAGs and the individual features used to compute the BAGs. This  
287 comparison is crucial for gaining insights into how the choice of predictors impacts the results of  
288 BAG GWAS, which, in turn, is fundamental for subsequent analyses related to pleiotropy and  
289 trait associations. We first estimated the SNP-based heritability for four pulmonary features and  
290 compared these with a set of multimodal brain imaging-derived phenotypes from our previous  
291 studies<sup>5–9</sup> using the same GCTA software. We hypothesized that the brain imaging features  
292 would exhibit a higher degree of heritability than the 4 pulmonary features of the pulmonary  
293 BAG (i.e., forced vital capacity, forced expiratory volume, peak expiratory flow, and the ratio of  
294 forced expiratory volume to forced vital capacity), supported by the results in **Supplementary**  
295 **Table 1c**. We then performed GWAS for the four pulmonary features within the European  
296 ancestry populations. The Manhattan and QQ plots are presented in **Supplementary Figure 13**.  
297 The pulmonary BAG showed high genetic correlations using LDSC with the four pulmonary  
298 features ( $-0.79 < g_c < 0.83$ , **Supplementary Table 3**). Using Bayesian colocalization analysis, we  
299 identified 99 potential causal variants ( $PP.H4.ABF > 0.80$ ) between the pulmonary BAG and the  
300 four underlying features (**Supplementary Source Data 8**). We showcased one causal variant  
301 evidenced at one locus (4q24) between the pulmonary BAG and the FEV/FCV feature  
302 (**Extended Data Figure 4**). The  $PP.H4.ABF$  (0.99) denotes the posterior probability of  
303 hypothesis H4, which suggests that both traits share the same causal SNP (rs7664805, mapped  
304 gene: *NPNT*). SNPs in linkage disequilibrium with the causal SNP were previously linked to  
305 chronic obstructive pulmonary disease in the GWAS Catalog. To elucidate the genetic overlap at  
306 the individual SNP level, we showed the  $\beta$  coefficient of the 48 potential causal variants that  
307 passed the genome-wide significance for the pulmonary BAG and at least one pulmonary feature  
308 in **Supplementary Figure 14**.

309

310 **Supplementary Note 6: Sensitivity check analyses for the causality between the nine BAGs**  
311 **A) Sensitivity analyses on body weight for the bi-directional causality between the hepatic**  
312 **and musculoskeletal BAGs**

313 We conducted a revised Mendelian randomization analysis by introducing body weight as a  
314 covariate in the split-sample GWASs for hepatic and musculoskeletal BAGs. In this approach,  
315 we employed hepatic BAG as the exposure variable in split1 GWAS and musculoskeletal BAG  
316 as the outcome variable in split2 GWAS. Likewise, we reversed the roles, using musculoskeletal  
317 BAG as the exposure variable in split1 GWAS and hepatic BAG as the outcome variable in  
318 split2 GWAS, thus assessing the inverse causal relationship. This methodology ensured the  
319 absence of overlapping populations while effectively controlling for the influence of body  
320 weight. Compared to the original results, this bi-directional causality persisted while adjusting  
321 the body weight as a covariate, shown in **Supplementary Table 6A and B**.

322  
323 **B) Sensitivity analysis for the hepatic BAG on musculoskeletal BAG excluding the *APOE***  
324 **gene**

325 We conducted a revised Mendelian randomization analysis by excluding SNPs within the *APOE*  
326 gene for the causal relationship from the hepatic BAG to the musculoskeletal BAGs; all other  
327 significant causality did not involve the two common *APOE* gene SNPs (rs429358 and rs7412).  
328 In this approach, we employed hepatic BAG as the exposure variable in split1 GWAS and  
329 musculoskeletal BAG as the outcome variable in split2 GWAS. Compared to the original results,  
330 this causality persisted while excluding the SNP (rs429358) as an IV, shown in **Supplementary**  
331 **Table 6C**.

332  
333 **C) Sensitivity analyses for metabolic BAG on body weight**

334 We showcased sensitivity analyses to investigate potential violations of the three IV  
335 assumptions. To illustrate this, we showcased the sensitivity analysis results for the causal effect  
336 of the metabolic BAG on body weight (**Supplementary Figure 31**). In a leave-one-out analysis,  
337 no single SNP overwhelmingly drove the overall effect. There was evidence for minor  
338 heterogeneity<sup>10</sup> of the causal effect amongst SNPs (Cochran's Q value=57.33, P-value<1x10<sup>-5</sup>).  
339 Some SNPs exerted opposite causal effects compared to the model using all SNPs. The scatter  
340 plot indicated two obvious SNP outliers (rs117233107 and rs33959228), and the funnel plot  
341 showed slight asymmetry. Finally, the MR Egger estimator allows for pleiotropic effects  
342 independent of the effect on the exposure of interest (i.e., the InSIDE assumption<sup>11</sup>). Our results  
343 from the Egger estimator showed a small but not significant positive intercept (3.62x10<sup>-</sup>  
344 <sup>4</sup>±1.67x10<sup>-3</sup>, P-value=0.83), which may indicate that the IVW estimate is not likely biased<sup>11</sup>. We  
345 re-analyzed the IVW MR analyses by excluding the two outliers identified in **Supplementary**  
346 **Figure 31** (rs117233107 and rs33959228), which led to a similar OR [0.94 (0.91, 0.97) vs. 0.95  
347 (0.92, 0.98)] and a less significant P-value [6.9x10<sup>-4</sup> vs. 1.2x10<sup>-3</sup>].  
348

349 **Supplementary Note 7: Additional details on the machine learning models used for**  
350 **computing the BAG and comparison with the literature**

351 In each of the 20-fold cross-validation iterations, a linear support vector machine was employed  
352 to predict chronological age. The training set consisted of 19 folds of individuals, and the fitted  
353 regression coefficients (feature weights) were then applied iteratively to the remaining held-out  
354 set (test set) to predict the chronological age of each healthy individual. This approach ensured  
355 that the prediction model was not trained using the same individuals for which it made  
356 predictions, minimizing the risk of overfitting. Before each iteration of model training, all  
357 measures (excluding categorical variables) were standardized using the weighted column mean  
358 and standard deviation computed within the training set. The SVM box constraint and kernel  
359 scale were set to unity, while the half-width of the epsilon-insensitive band was set to a tenth of  
360 the standard deviation of the interquartile range of the predicted variable (chronological age).  
361 The SVM was solved using sequential minimal optimization with a gap tolerance of 0.001. The  
362 mathematical principles of support vector machines are well-established in the field and have  
363 been widely recognized<sup>12</sup>. Further details on this topic can be found in our previous study<sup>13</sup>.

364 The concept of biological age gap derived from artificial intelligence has been widely  
365 investigated, especially the brain age<sup>14,15</sup>. The calculation of the nine BAGs were established in  
366 our previous works<sup>5,13</sup>. We previously showed that the prediction accuracy of biological age was  
367 not influenced by the number of phenotypes, despite variations across different organ systems.  
368 While some prior studies<sup>16</sup> used deep learning for brain BAG and obtained a lower mean  
369 absolute error, we have previously demonstrated that lower mean absolute error might  
370 compromise sensitivity to disease-related information<sup>17</sup>. In our previous GWAS<sup>5</sup>, which  
371 separately examined three multimodal brain BAGs derived from T1-weighted, diffusion, and  
372 resting-state fMRI data, we extensively investigated the influence of various brain imaging  
373 feature types and study designs on the genetic signals. Our results unveiled both the consistency  
374 and distinctions in the genetic foundations across these diverse contexts. Finally, we recognize  
375 that ascertainment bias may be present in our GWAS due to variations in sequencing techniques,  
376 differences between populations (e.g., disease populations vs. healthy controls), and  
377 socioeconomic factors that have not been explicitly modeled in our study.  
378



379 **Supplementary Figure 1: GWAS Manhattan plots for the brain BAG**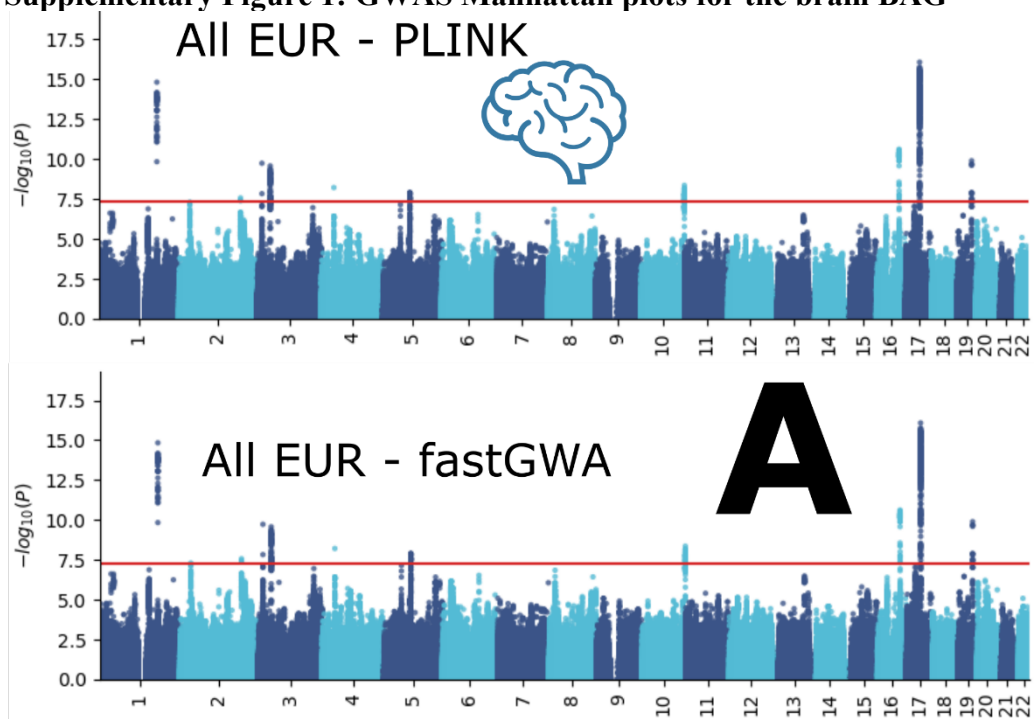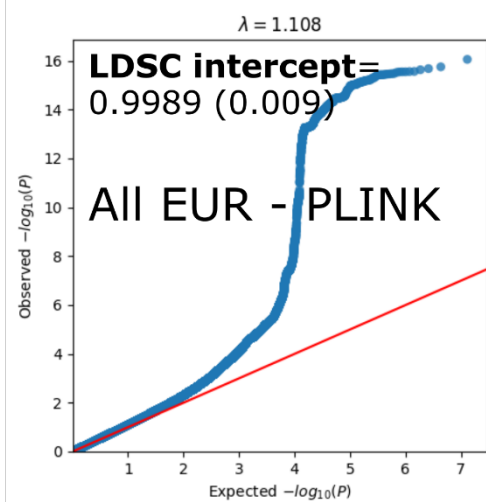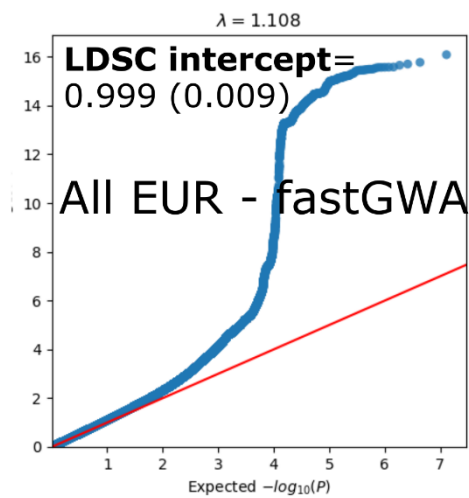

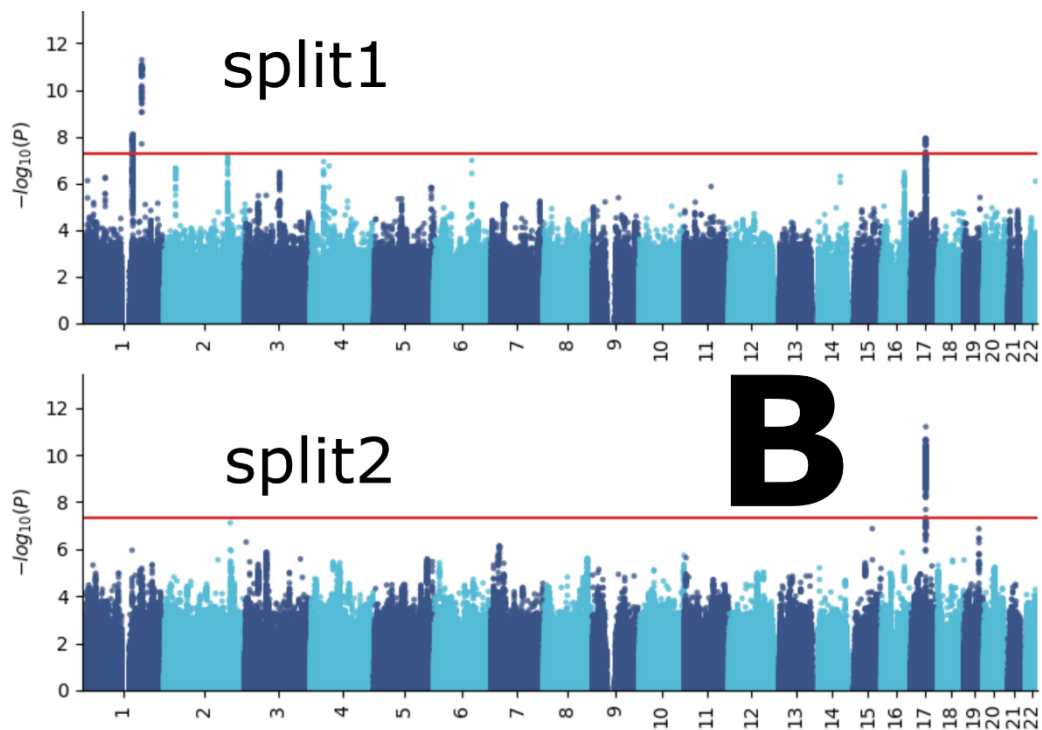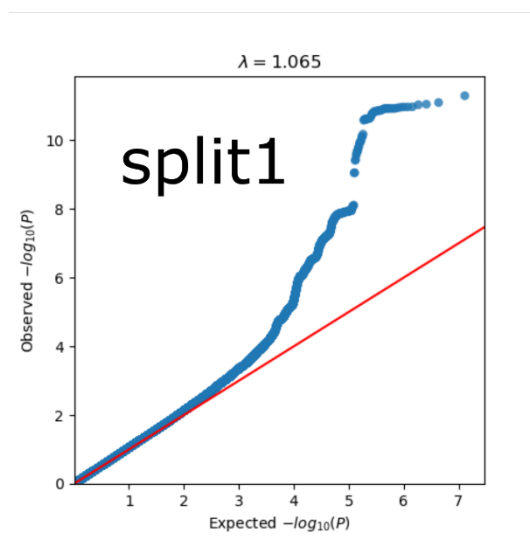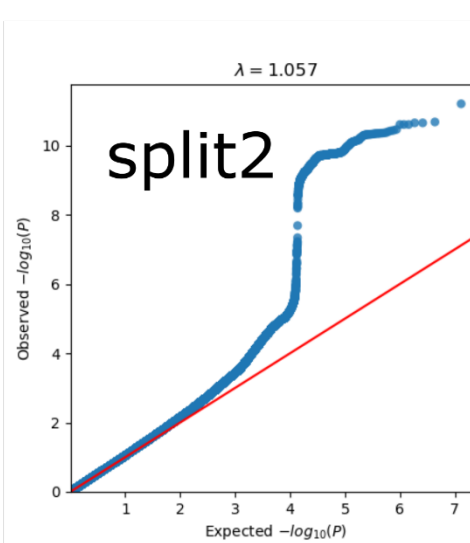

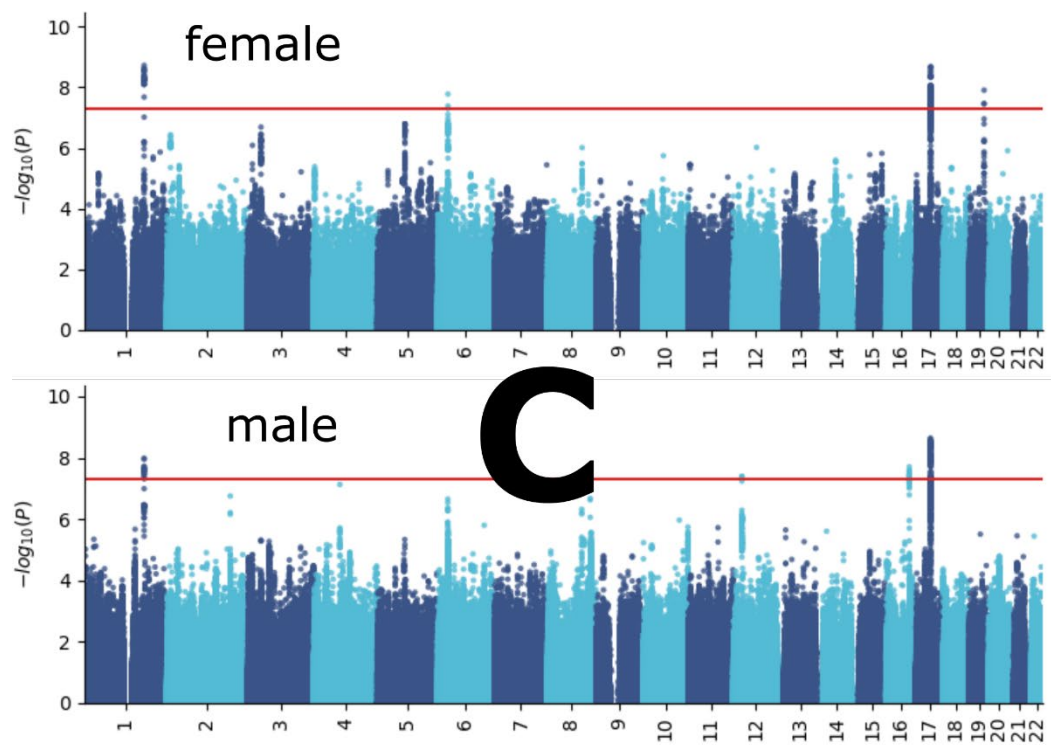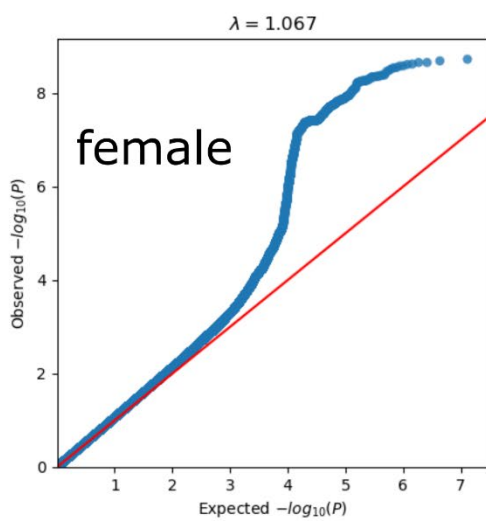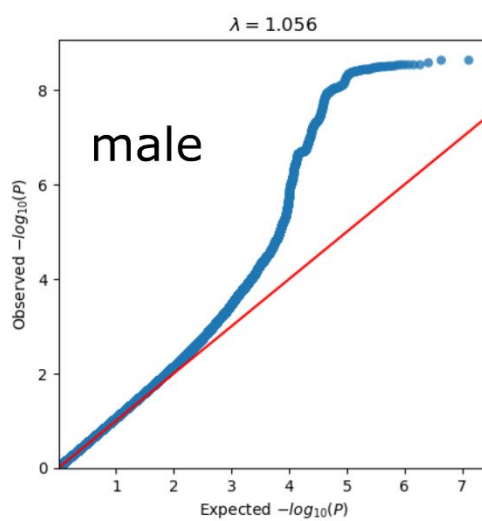

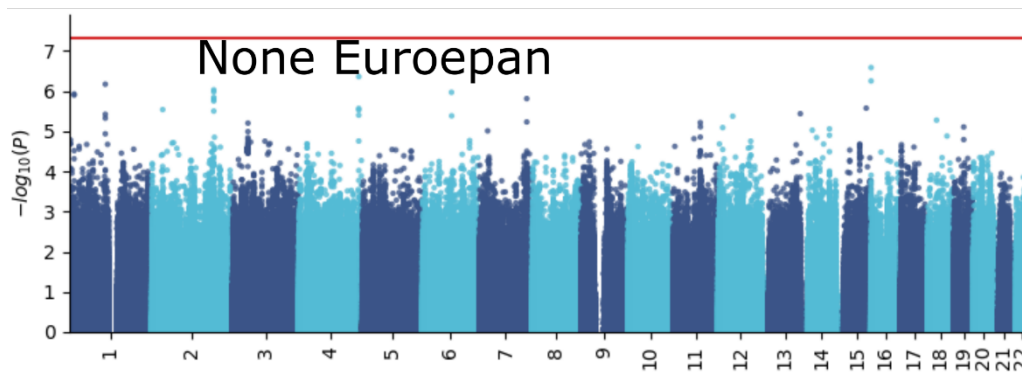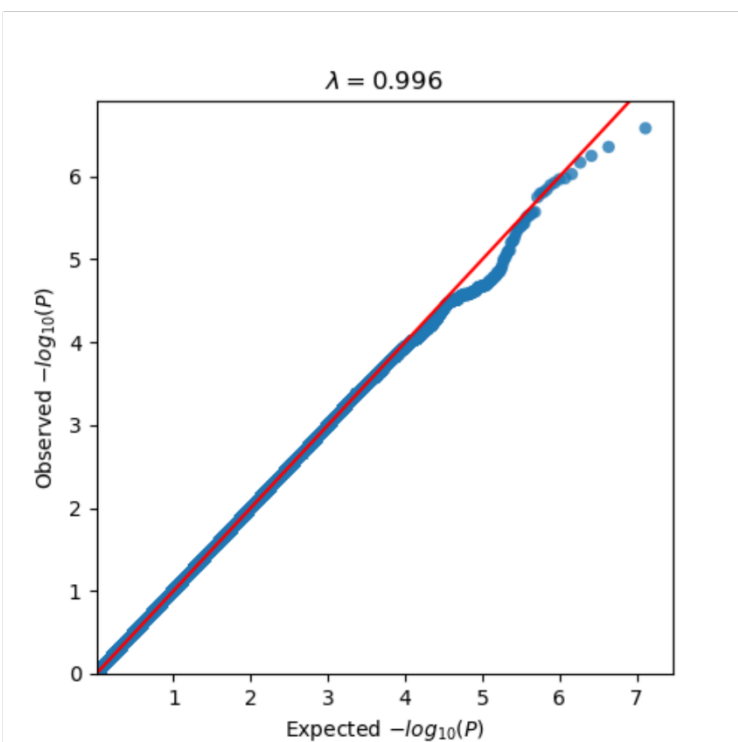

**D**

383  
 384 Manhattan and QQ plots, along with genomic inflation factors and LDSC intercepts, are  
 385 displayed for the primary GWAS conducted on individuals of European ancestry ( $N=30,062$ )  
 386 using PLINK and fastGWA (**A**). Additionally, results are presented for split-sample GWAS  
 387 (split1 and split2, **B**), sex-stratified GWAS (female and male, **C**), and GWAS involving non-  
 388 European ancestry populations ( $N=4465$ , **D**). All P-values were two-sided, and a genome-wide  
 389 P-values threshold was used.

390 **Supplementary Figure 2: GWAS Manhattan plots for the cardiovascular BAG**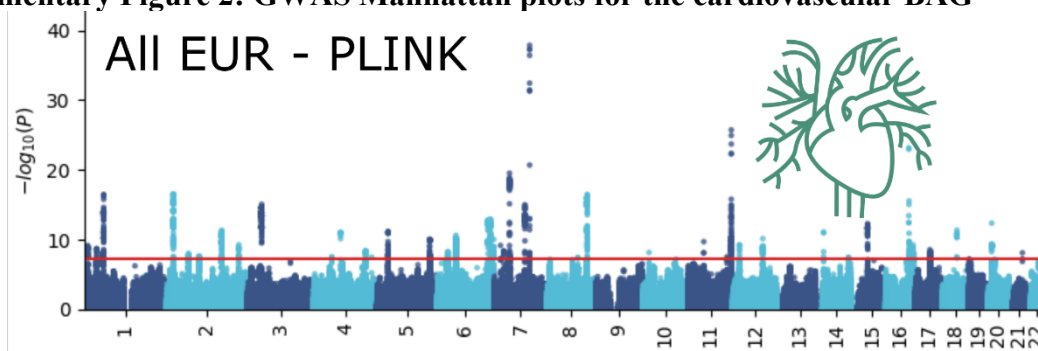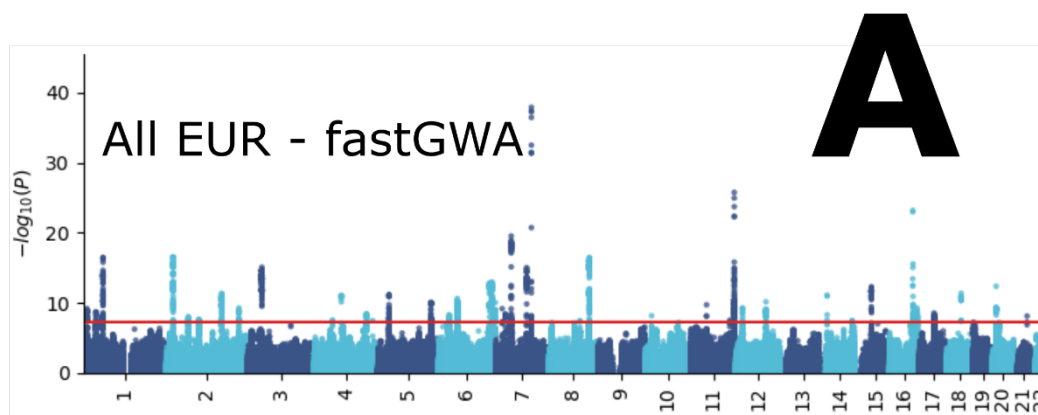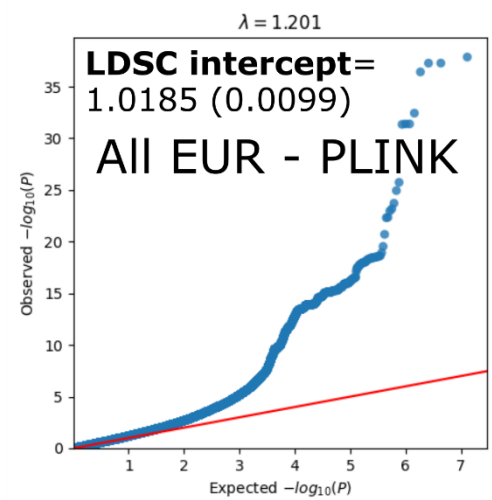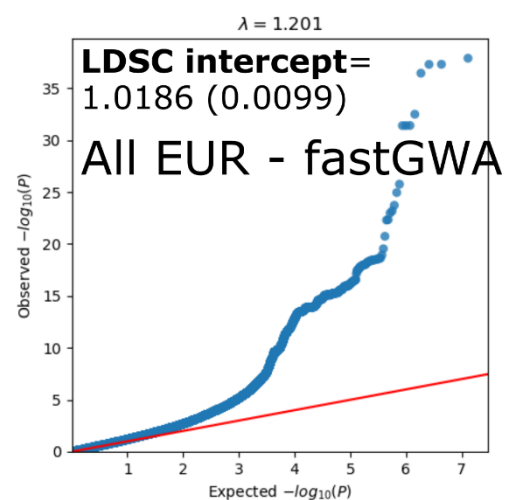

391

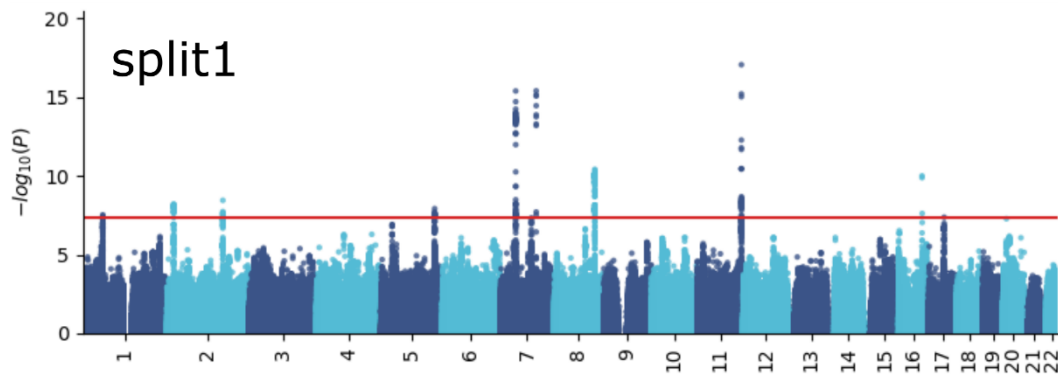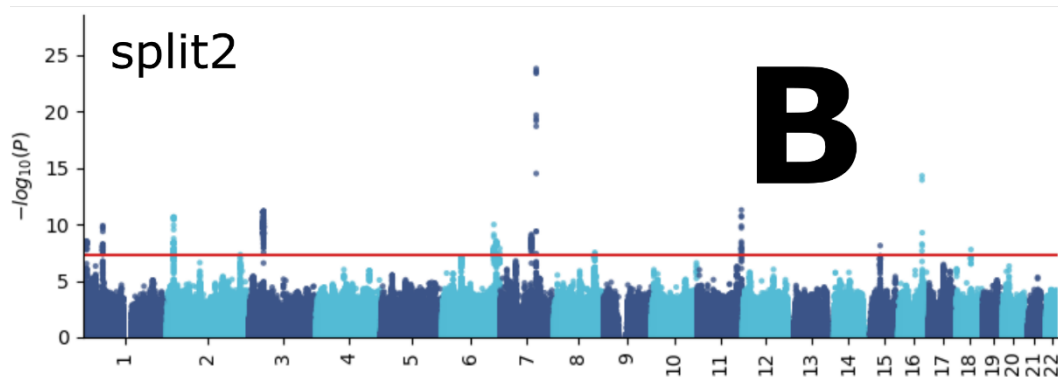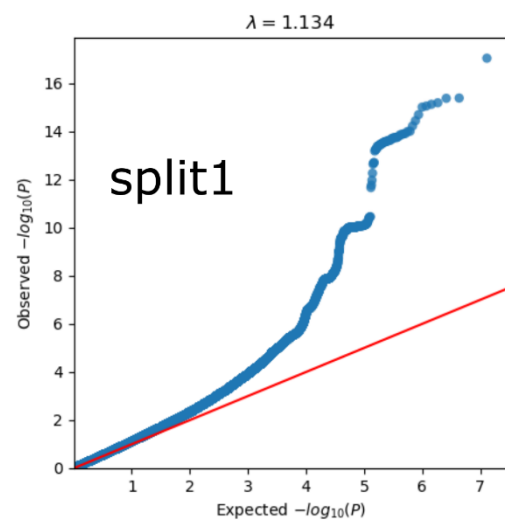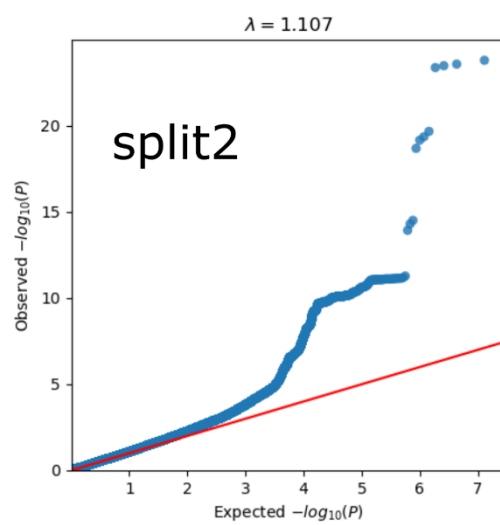

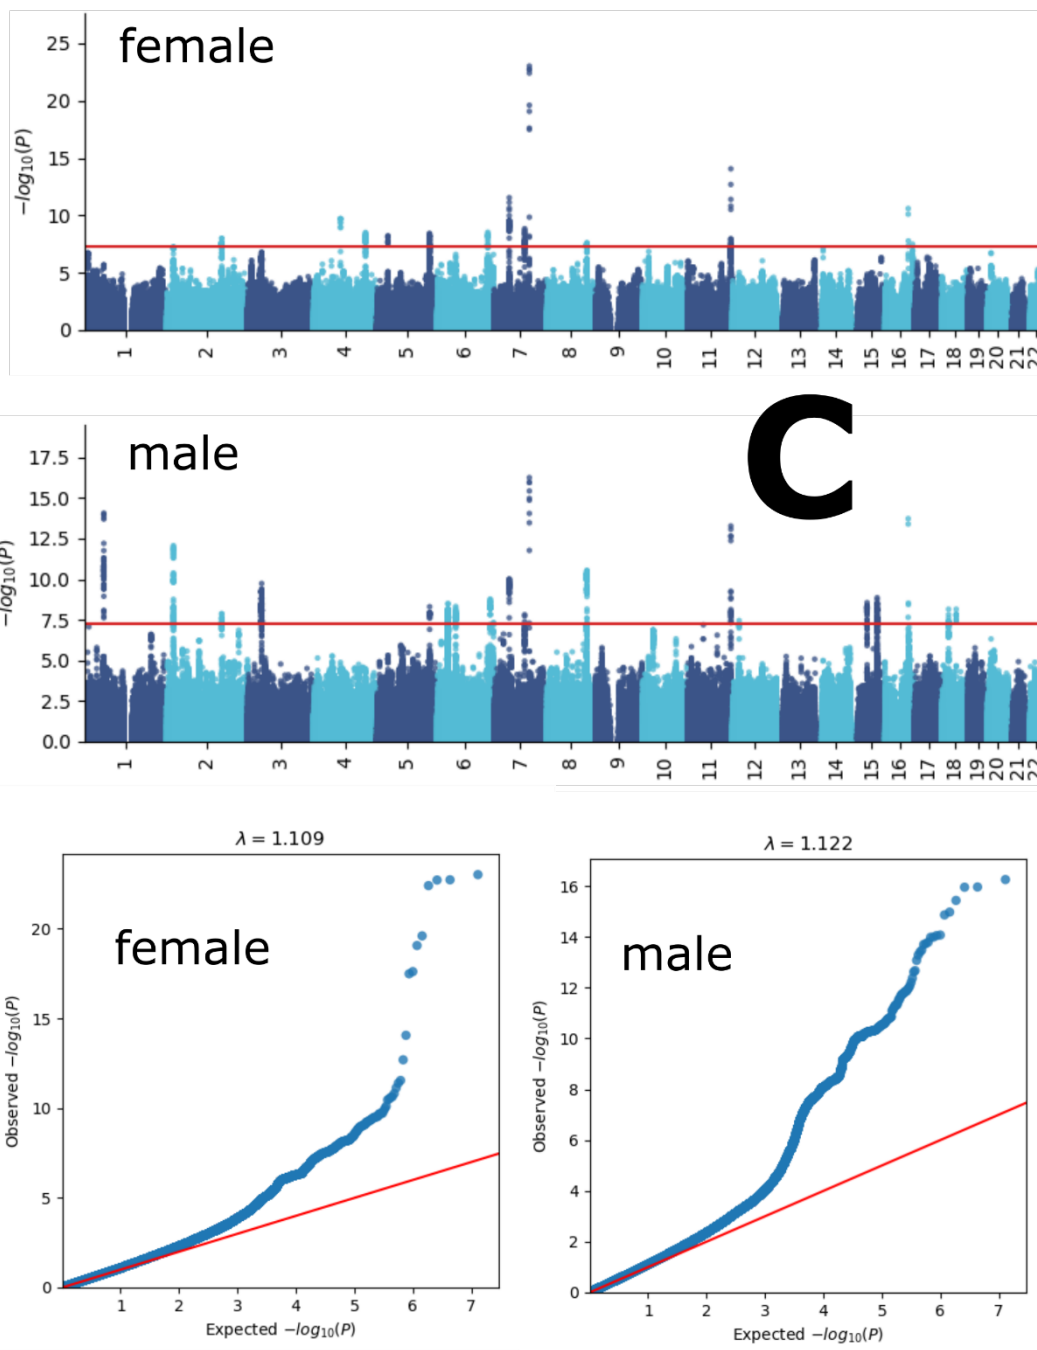

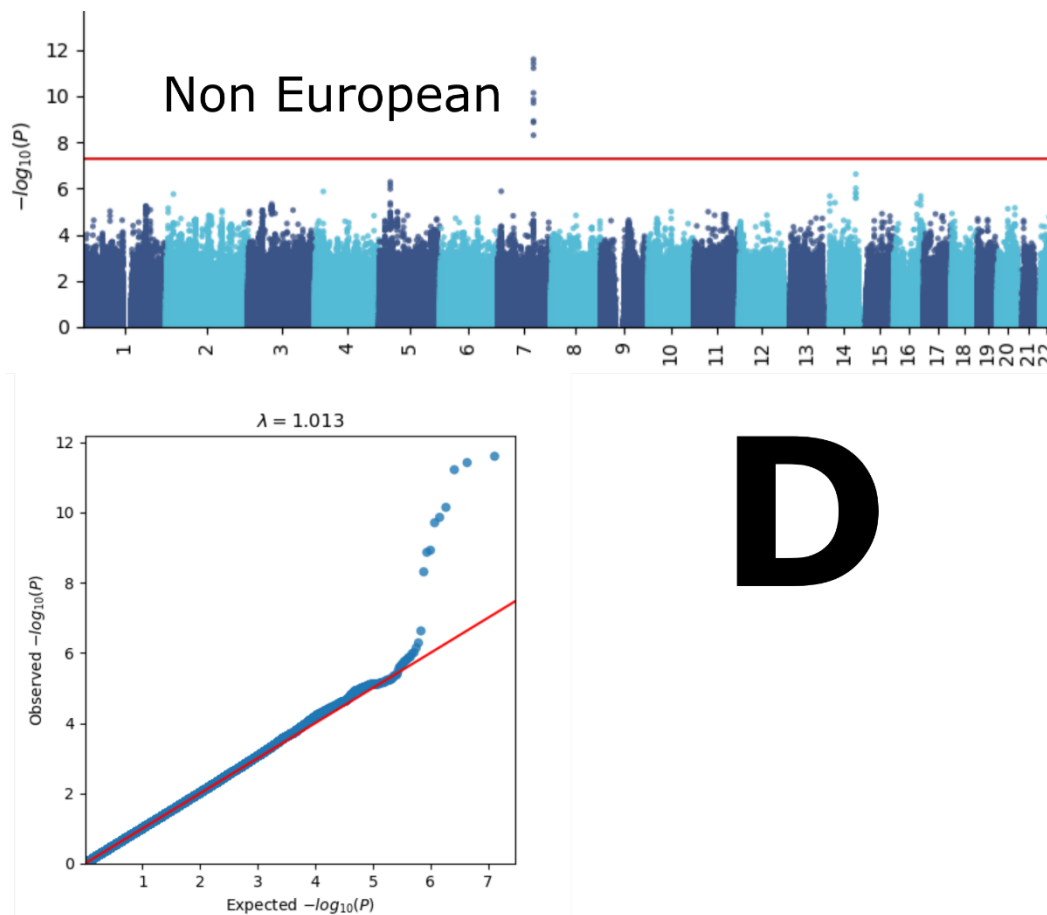

394  
 395 Manhattan and QQ plots, along with genomic inflation factors and LDSC intercepts, are  
 396 displayed for the primary GWAS conducted on individuals of European ancestry ( $N=111,386$ )  
 397 using PLINK and fastGWA (**A**). Additionally, results are presented for split-sample GWAS  
 398 (split1 and split2, **B**), sex-stratified GWAS (female and male, **C**), and GWAS involving non-  
 399 European ancestry populations ( $N=20,408$ , **D**). All P-values were two-sided, and a genome-wide  
 400 P-values threshold was used.



401 **Supplementary Figure 3: GWAS Manhattan plots for the eye BAG**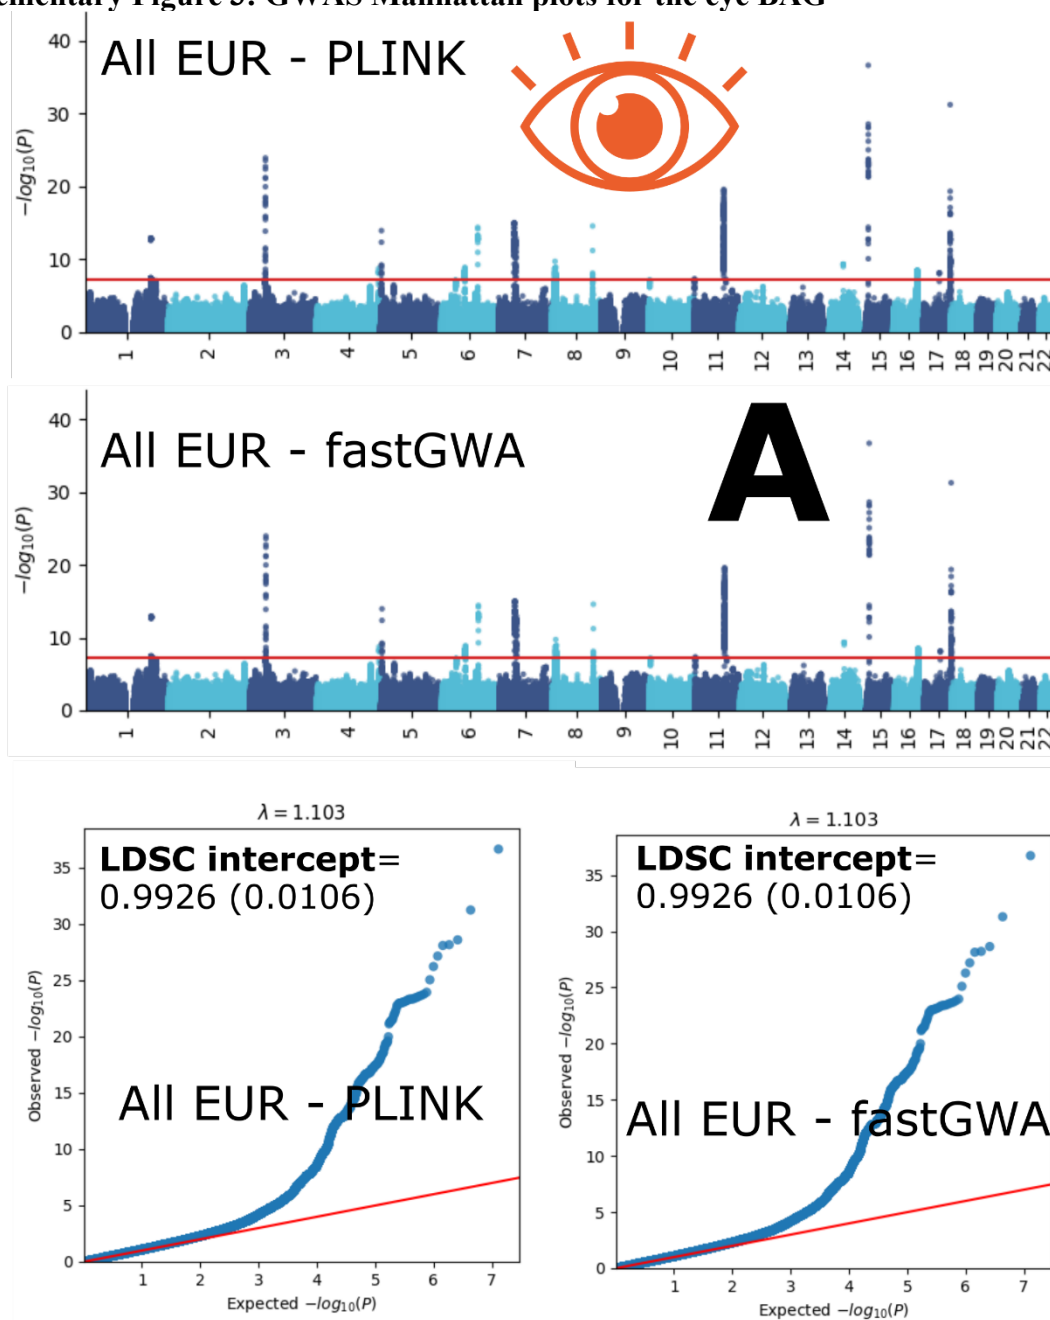

402

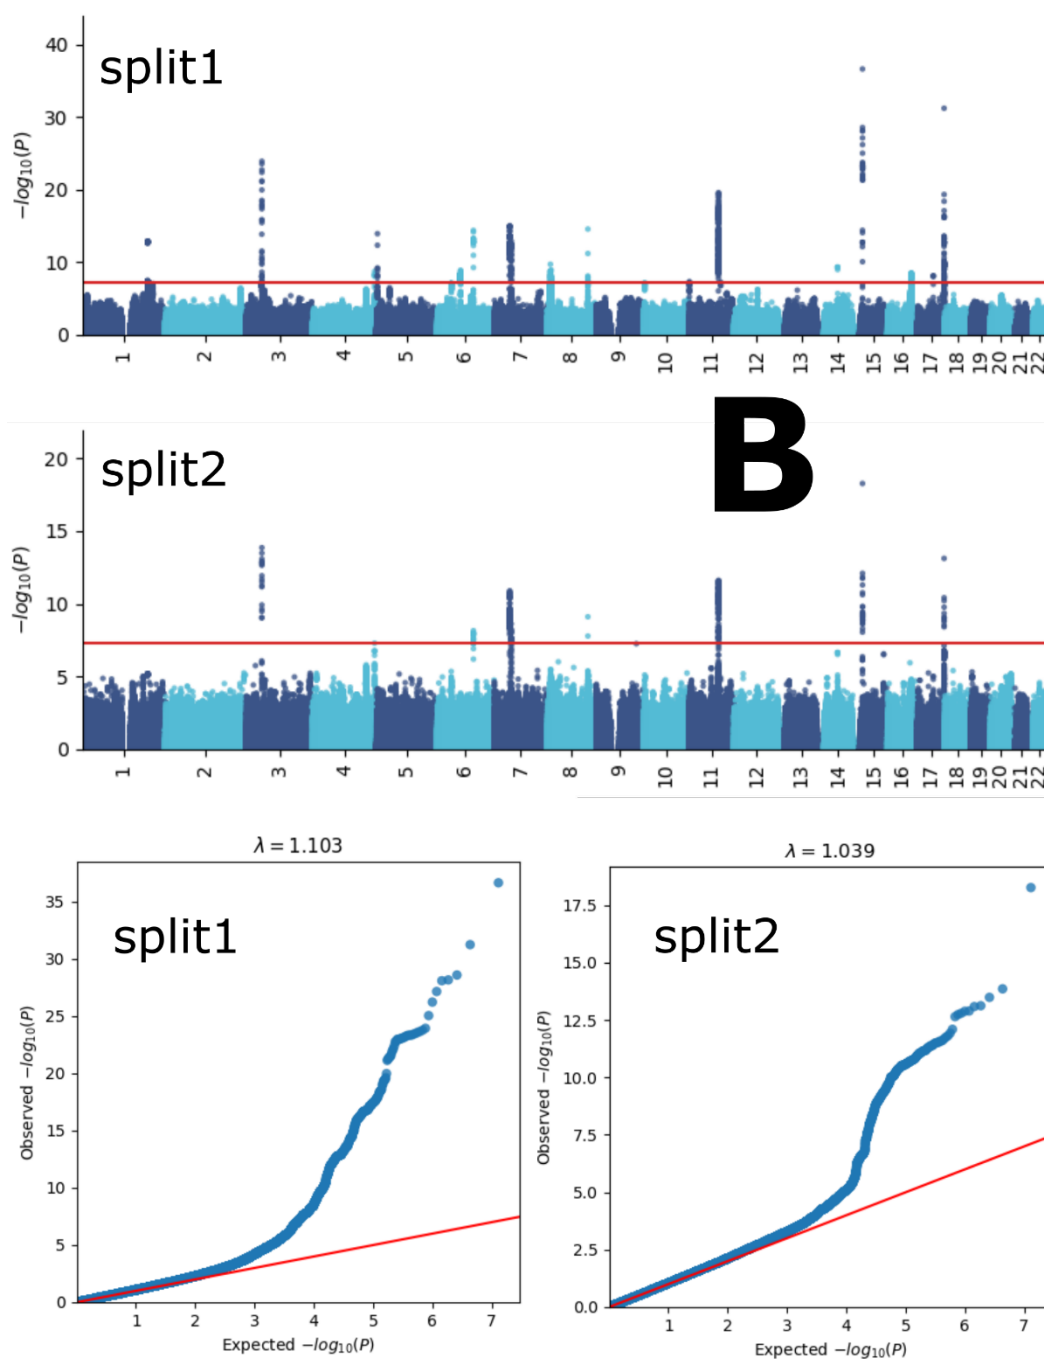

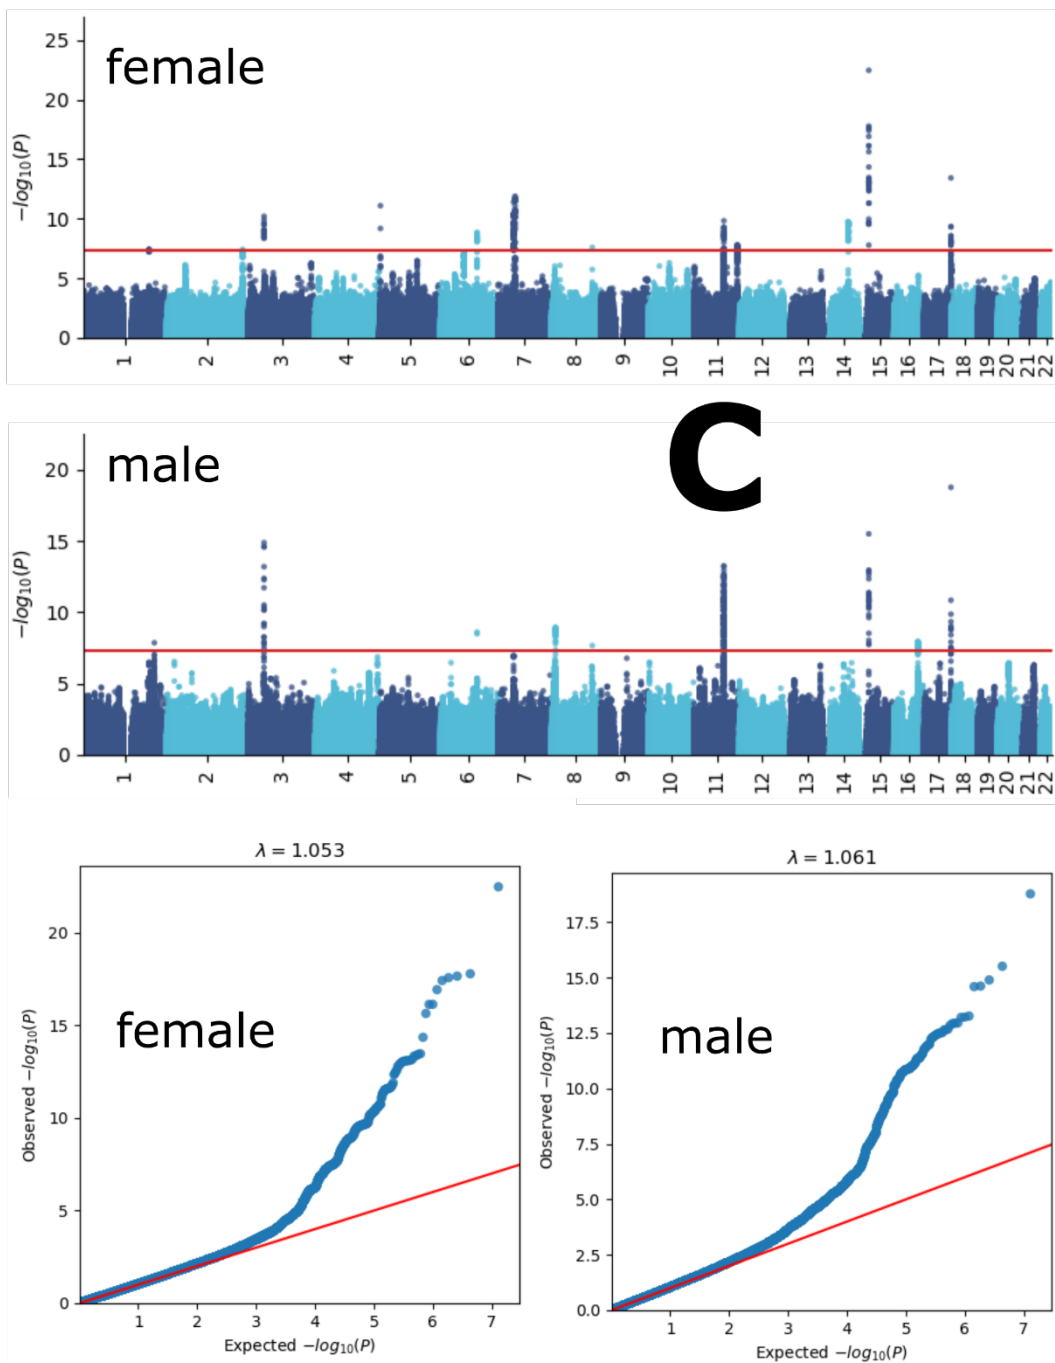

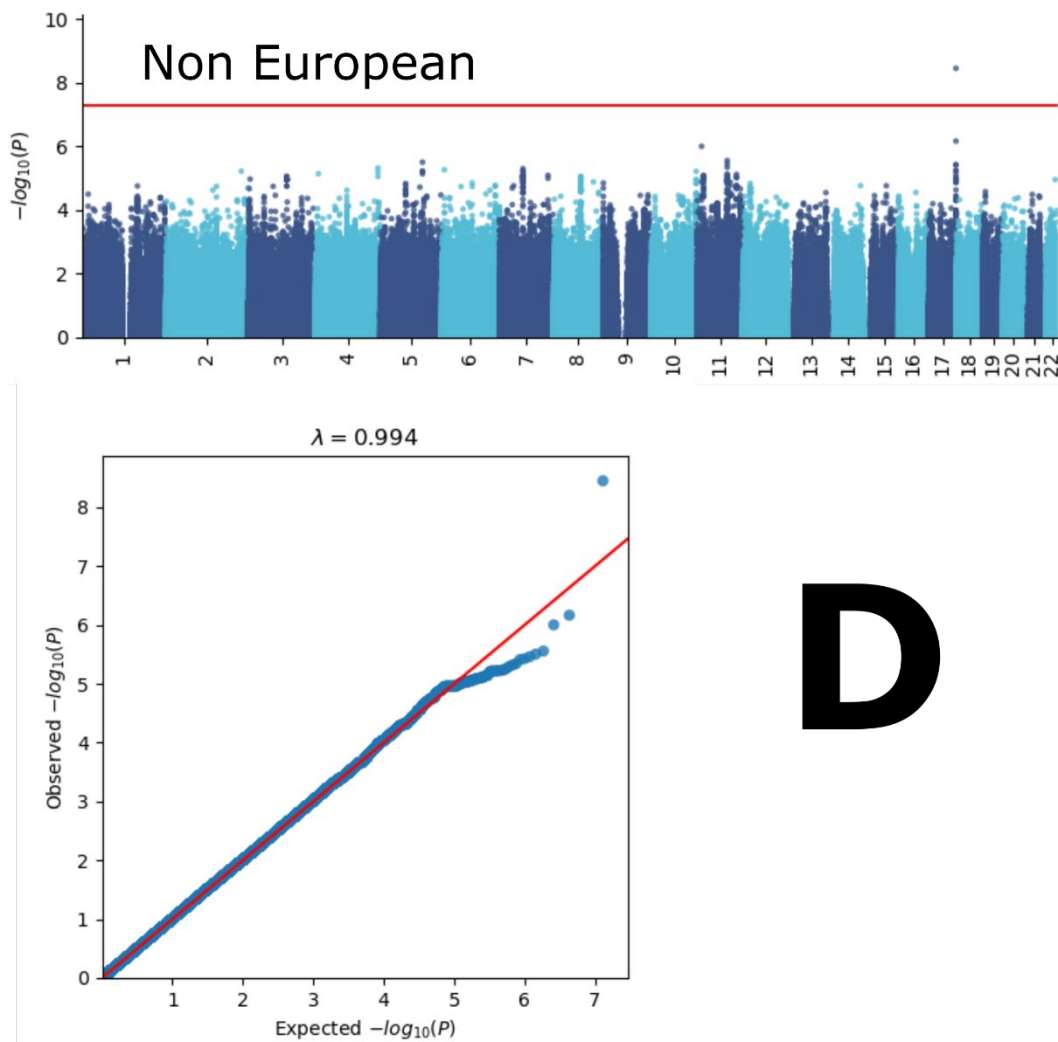

**D**

405  
 406 Manhattan and QQ plots, along with genomic inflation factors and LDSC intercepts, are  
 407 displayed for the primary GWAS conducted on individuals of European ancestry ( $N=36,004$ )  
 408 using PLINK and fastGWA (**A**). Additionally, results are presented for split-sample GWAS  
 409 (split1 and split2, **B**), sex-stratified GWAS (female and male, **C**), and GWAS involving non-  
 410 European ancestry populations ( $N=3407$ , **D**). All P-values were two-sided, and a genome-wide  
 411 P-values threshold was used.

412 **Supplementary Figure 4: GWAS Manhattan plots for the hepatic BAG**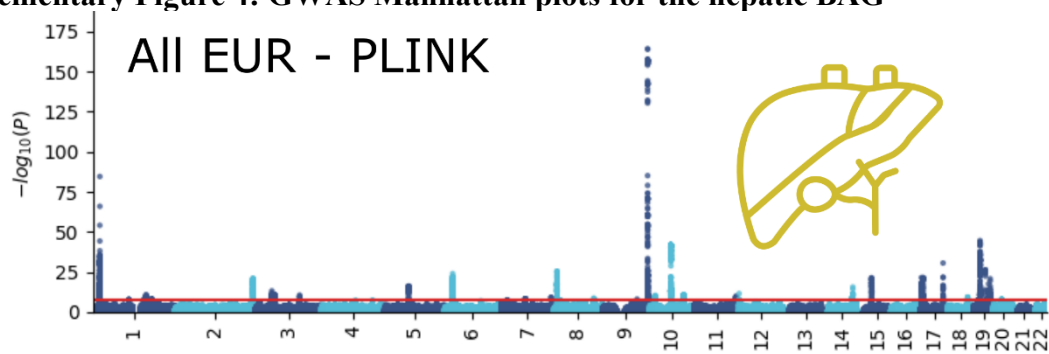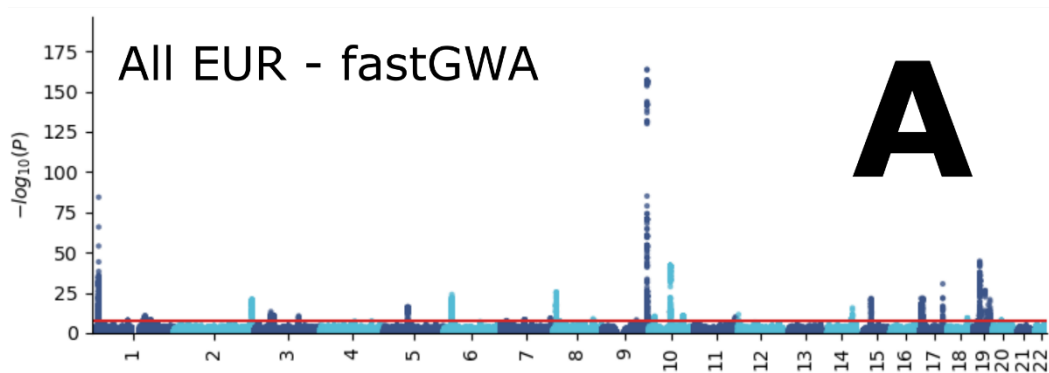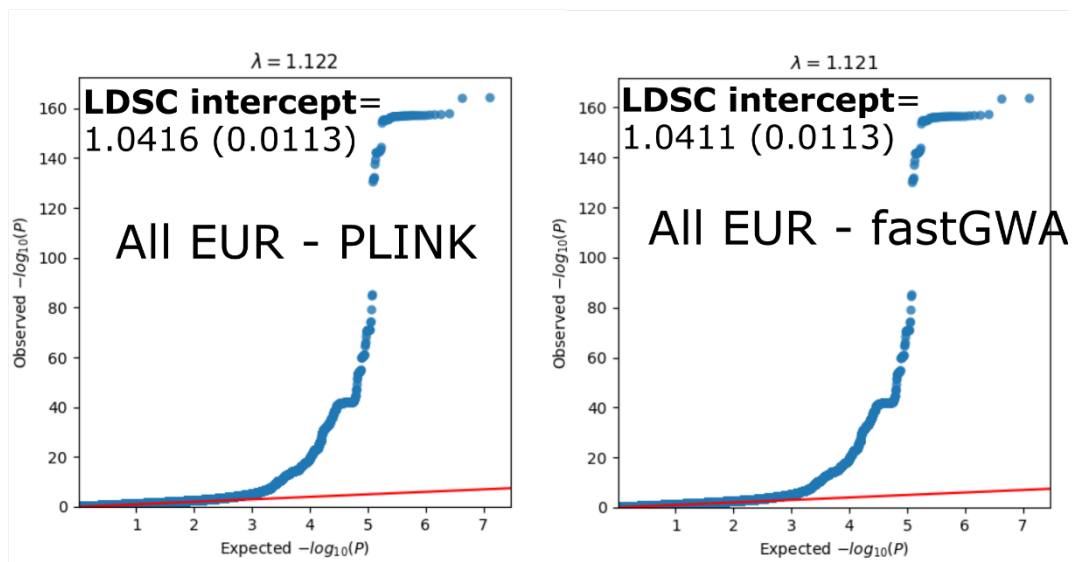

413

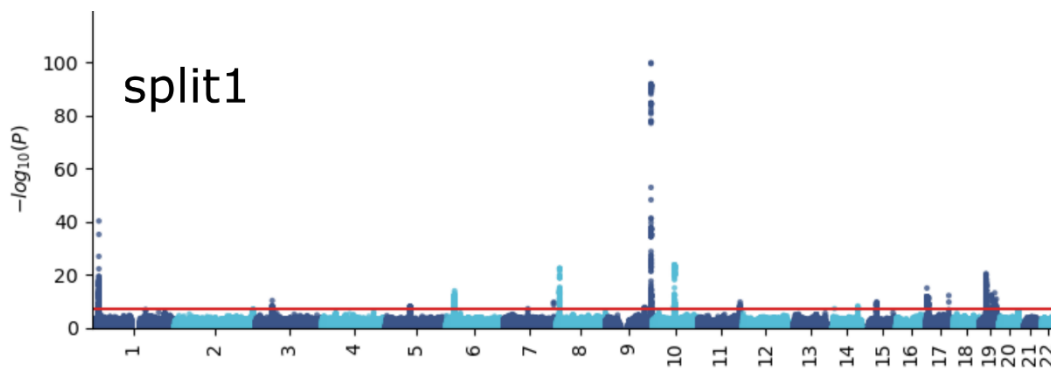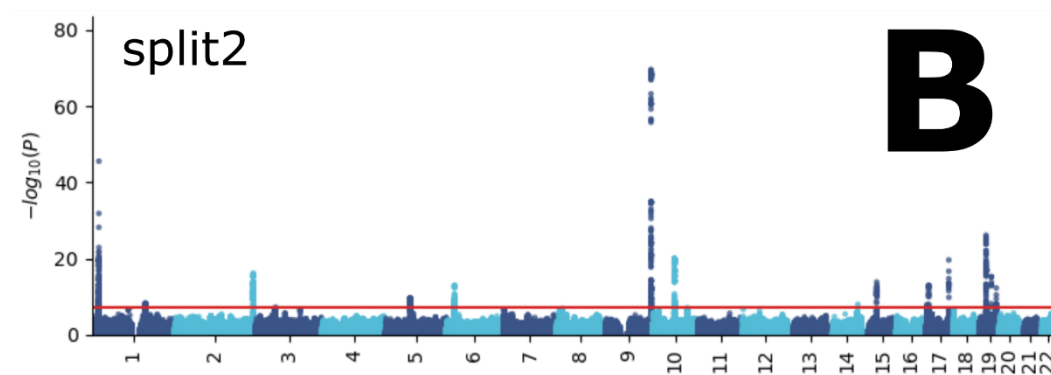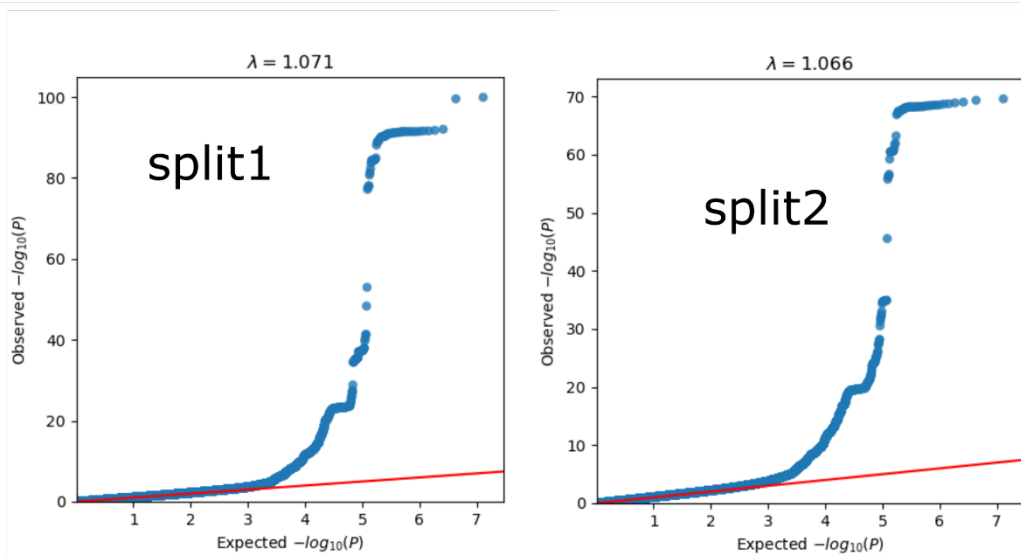

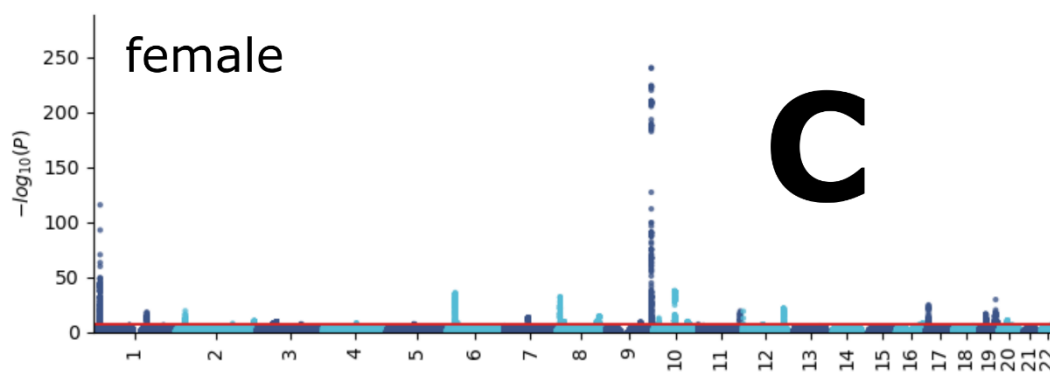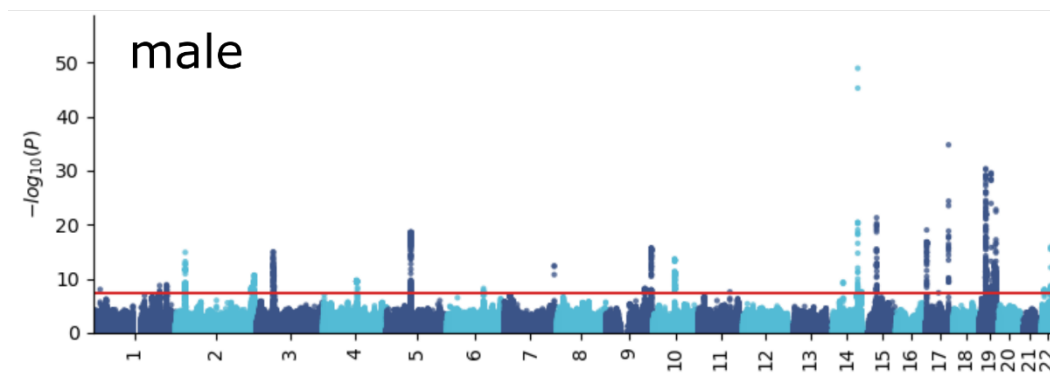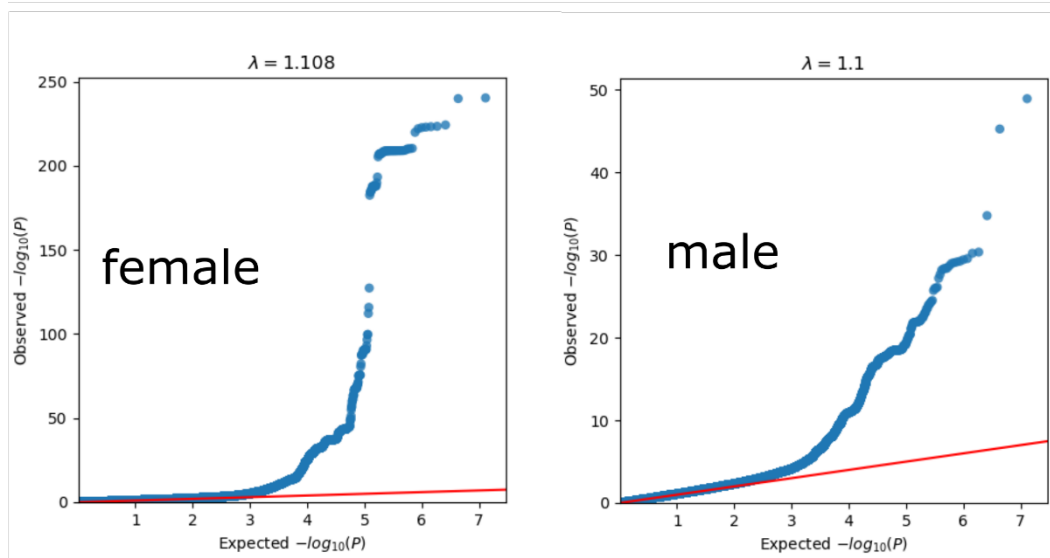

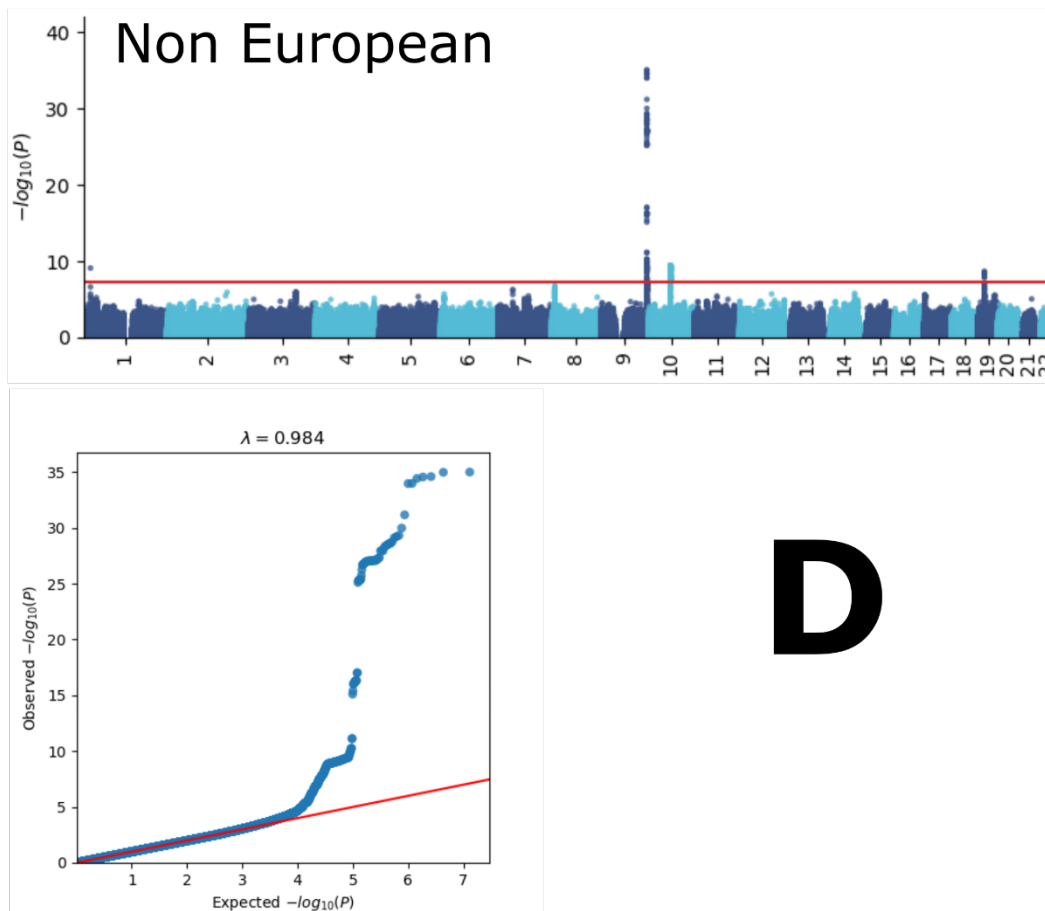

**D**

416  
 417 Manhattan and QQ plots, along with genomic inflation factors and LDSC intercepts, are  
 418 displayed for the primary GWAS conducted on individuals of European ancestry ( $N=111,386$ )  
 419 using PLINK and fastGWA (**A**). Additionally, results are presented for split-sample GWAS  
 420 (split1 and split2, **B**), sex-stratified GWAS (female and male, **C**), and GWAS involving non-  
 421 European ancestry populations ( $N=20,408$ , **D**). All P-values were two-sided, and a genome-wide  
 422 P-values threshold was used.



423 **Supplementary Figure 5: GWAS Manhattan plots for the immune BAG**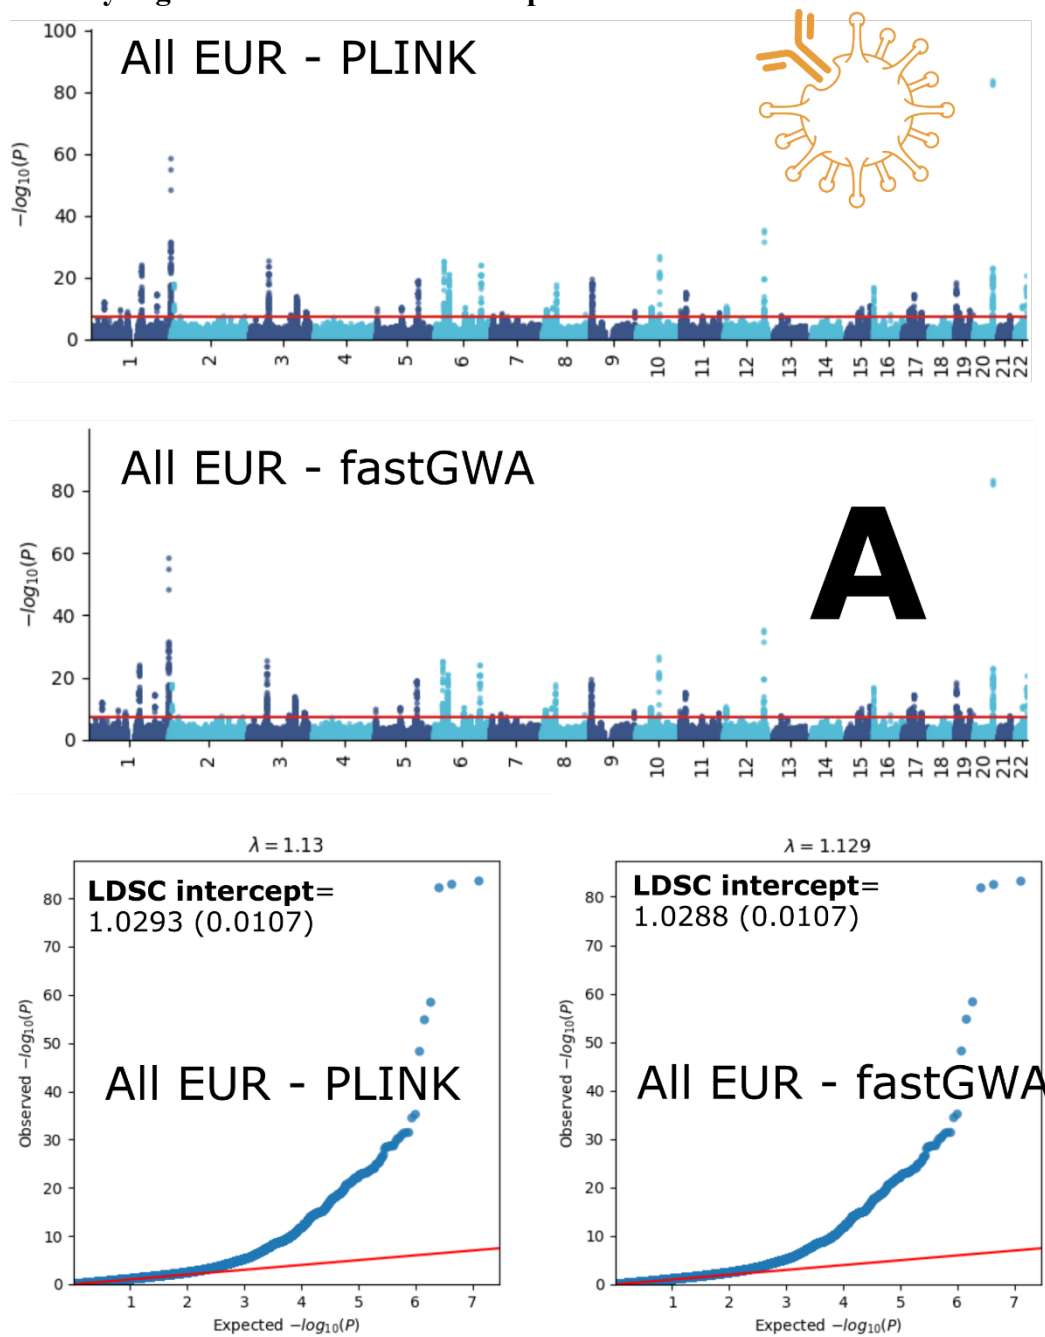

424

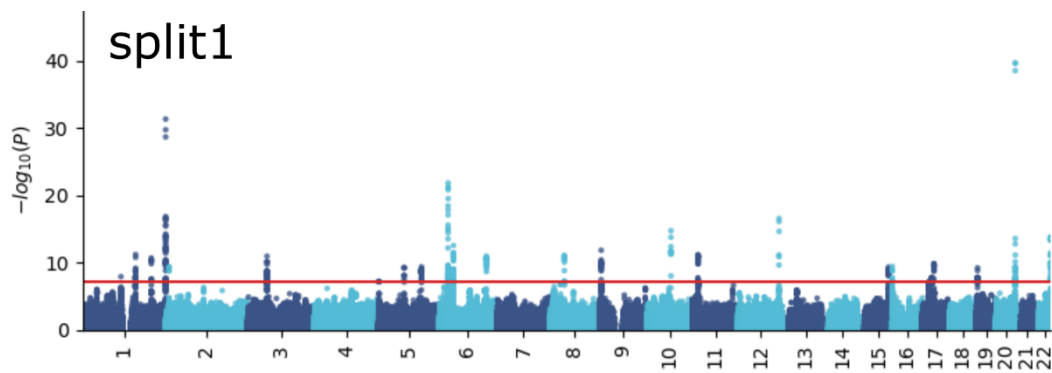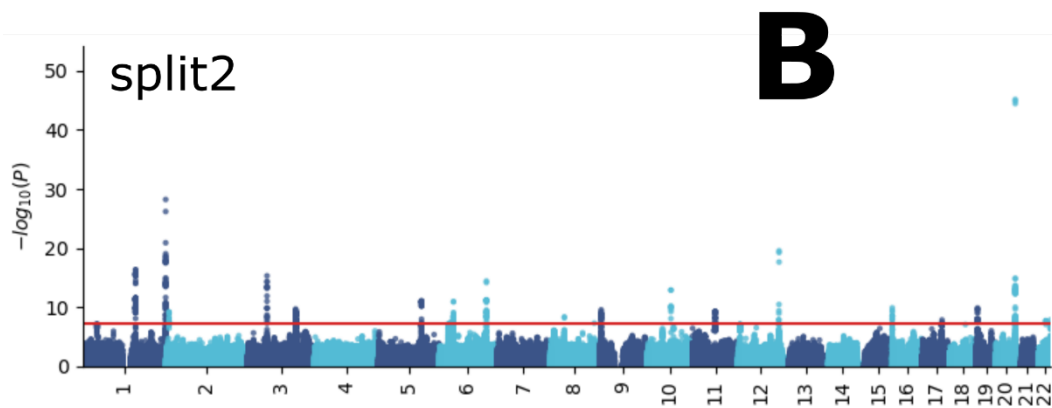**B**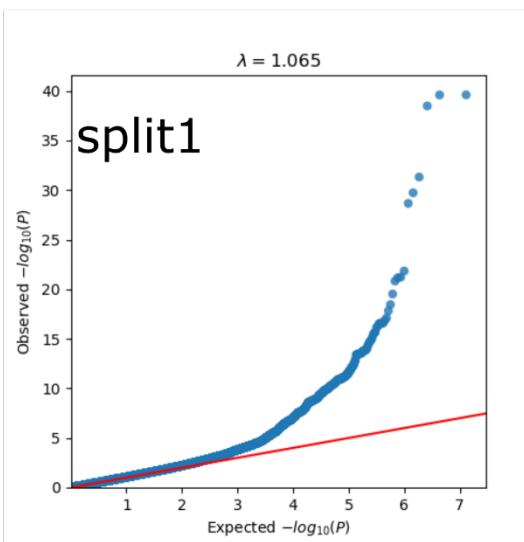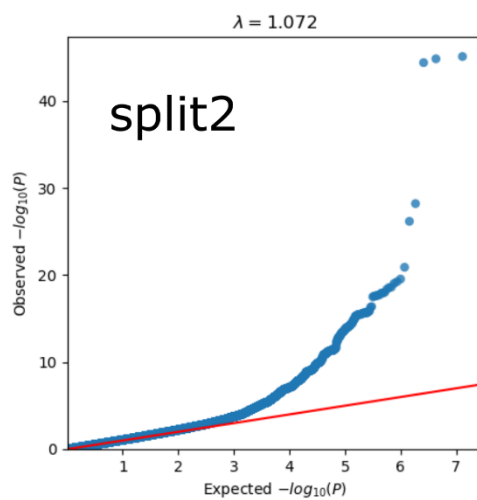

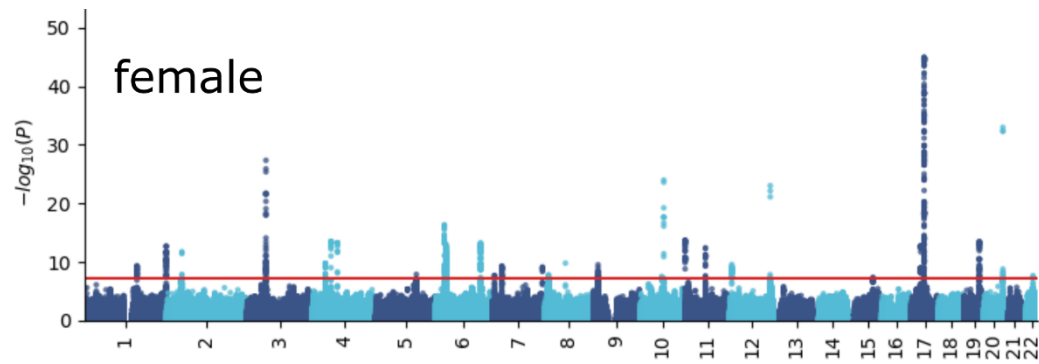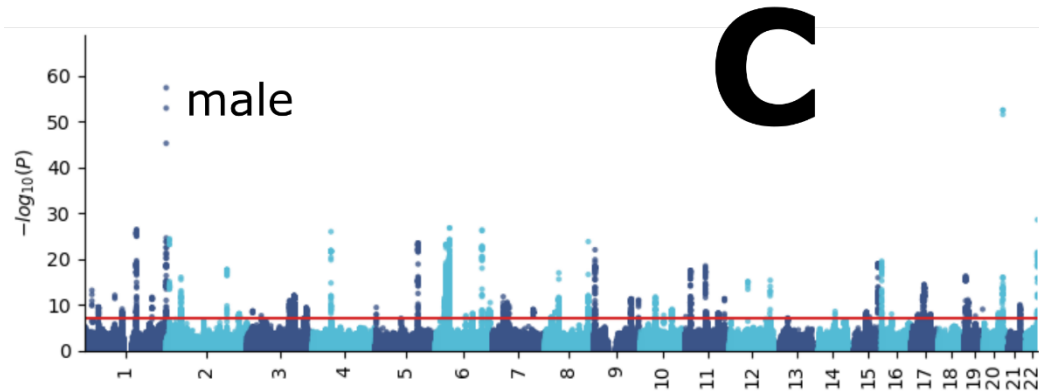

C

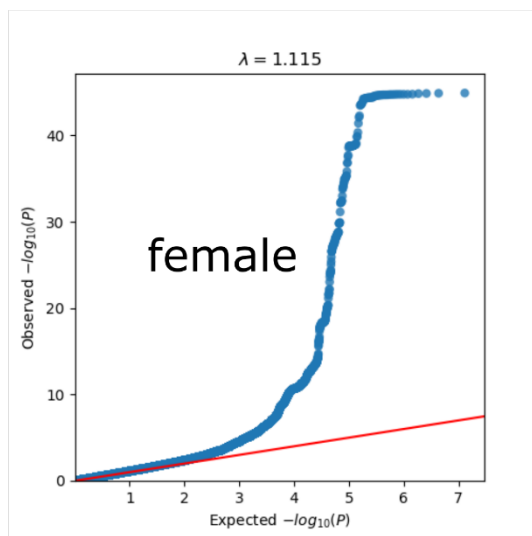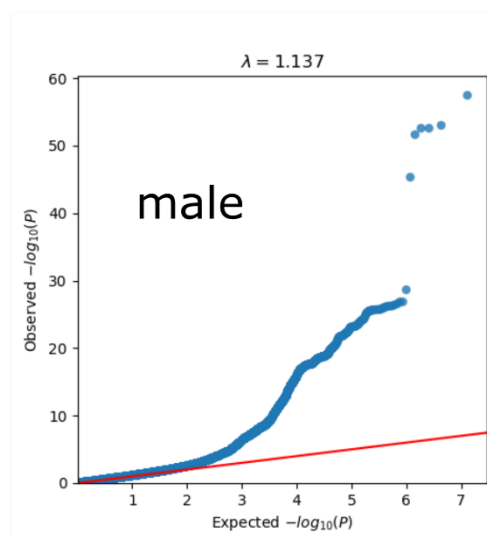

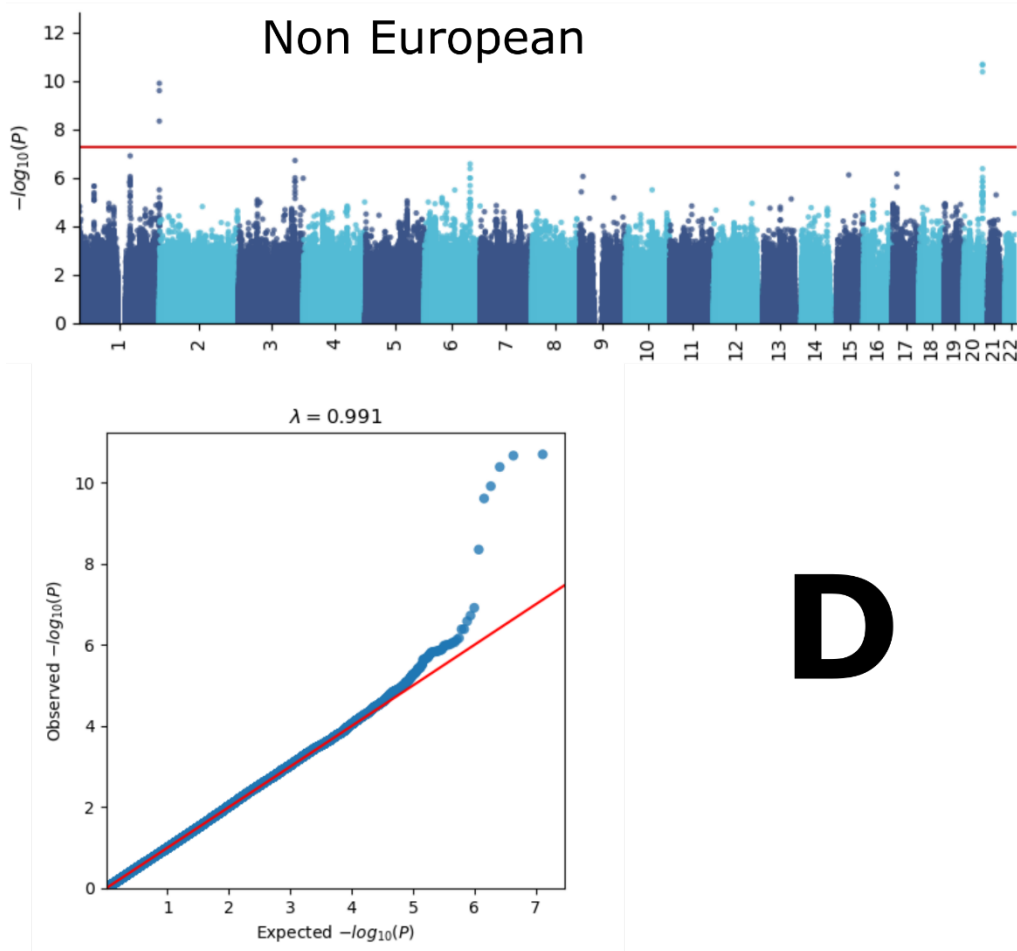

**D**

427  
 428 Manhattan and QQ plots, along with genomic inflation factors and LDSC intercepts, are  
 429 displayed for the primary GWAS conducted on individuals of European ancestry ( $N=111,386$ )  
 430 using PLINK and fastGWA (**A**). Additionally, results are presented for split-sample GWAS  
 431 (split1 and split2, **B**), sex-stratified GWAS (female and male, **C**), and GWAS involving non-  
 432 European ancestry populations ( $N=20,408$ , **D**). All P-values were two-sided, and a genome-wide  
 433 P-values threshold was used.

434 **Supplementary Figure 6: GWAS Manhattan plots for the metabolic BAG**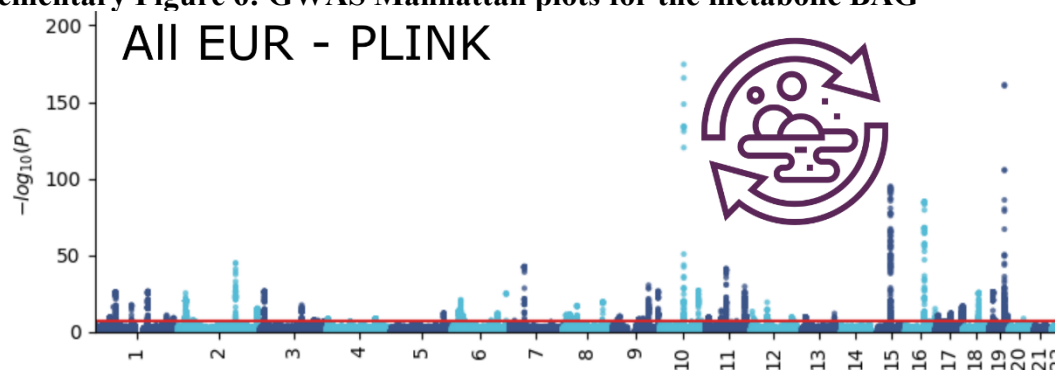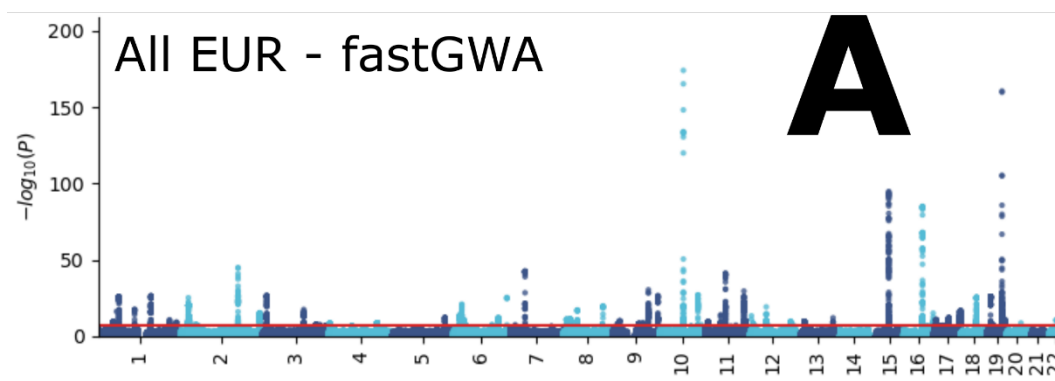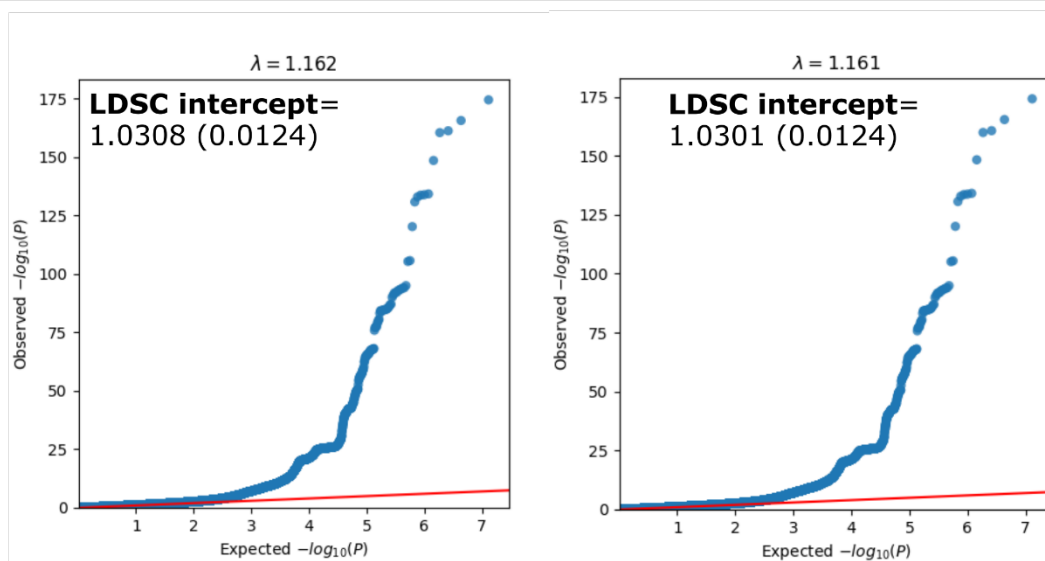

All EUR - PLINK

All EUR - fastGWA

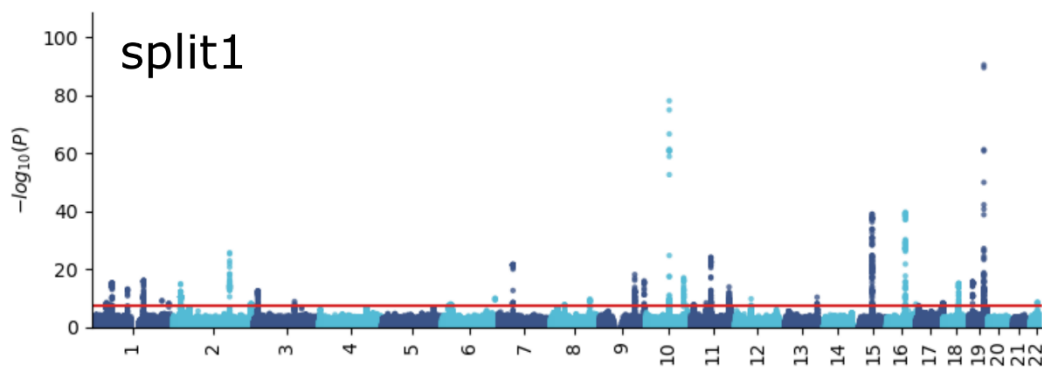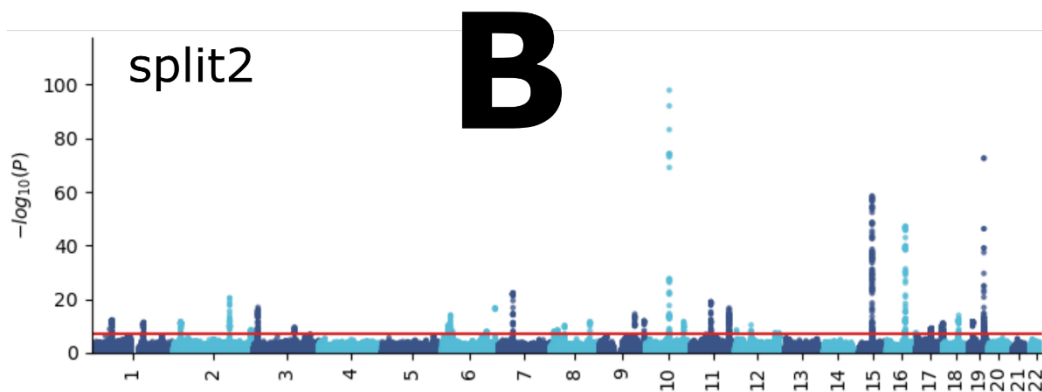

**B**

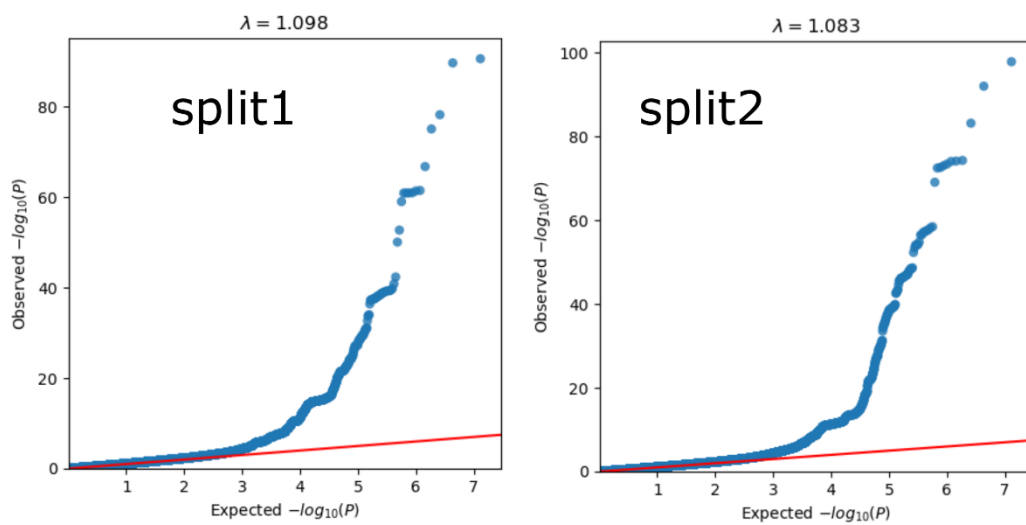

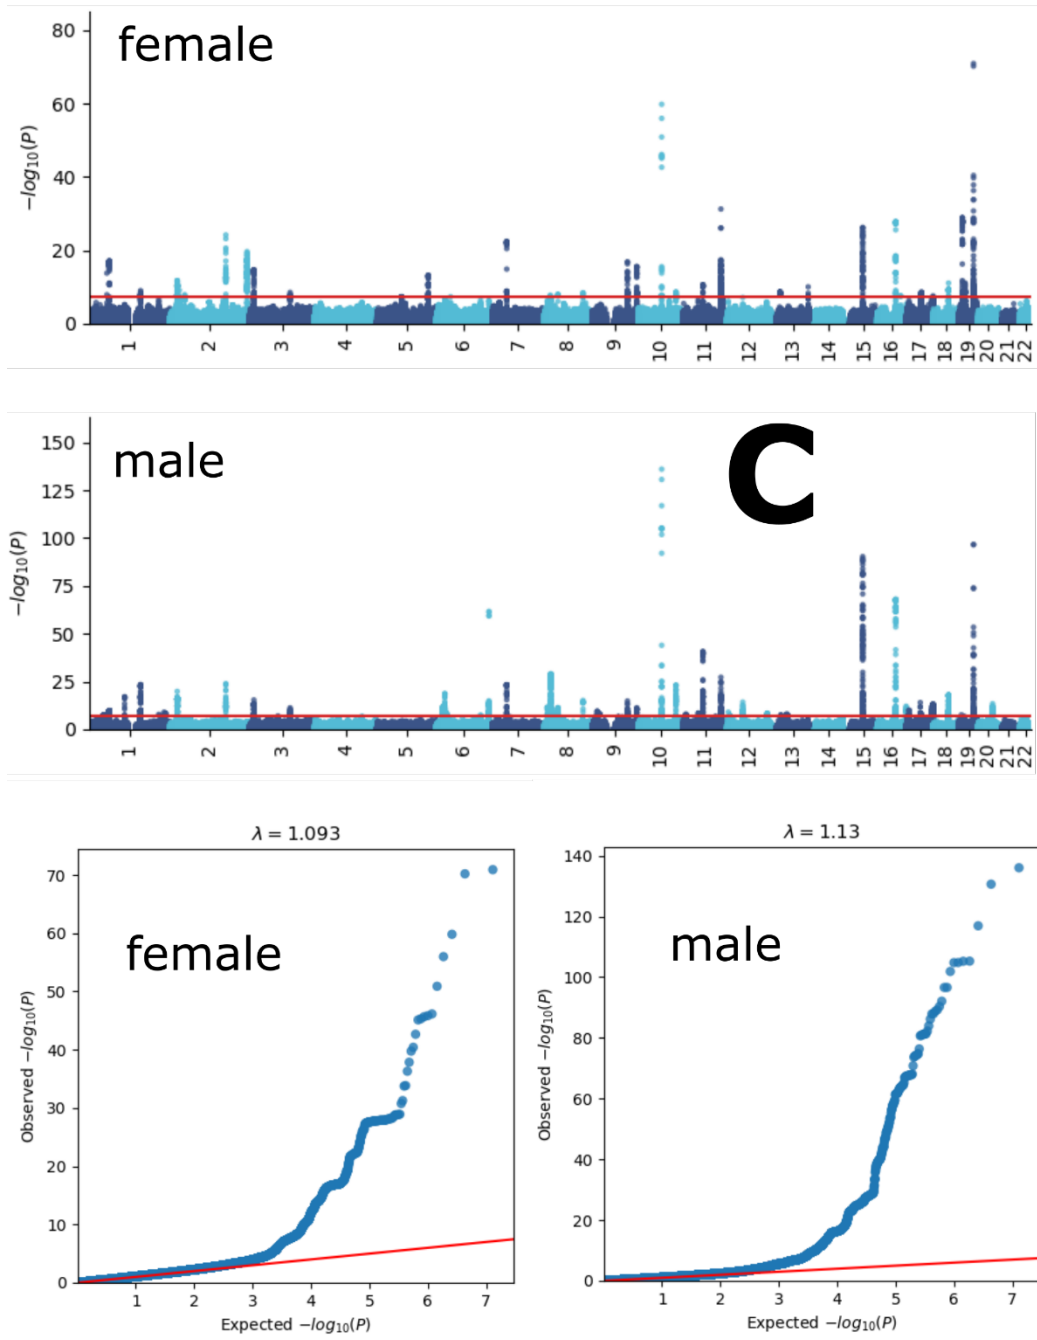

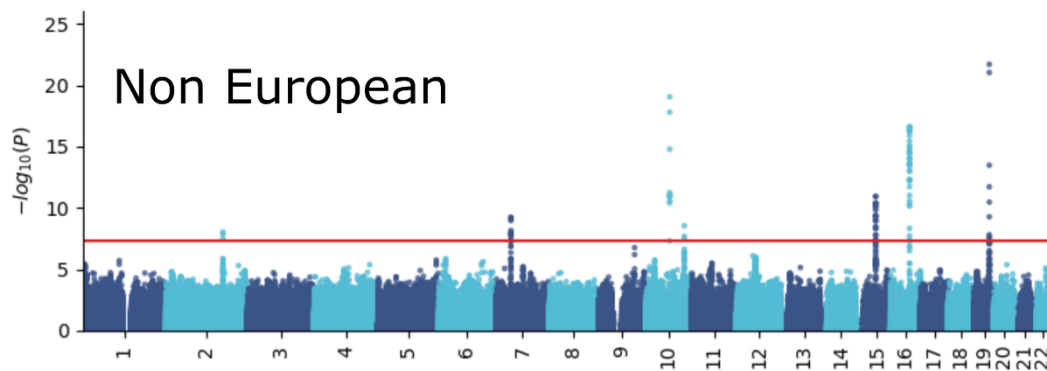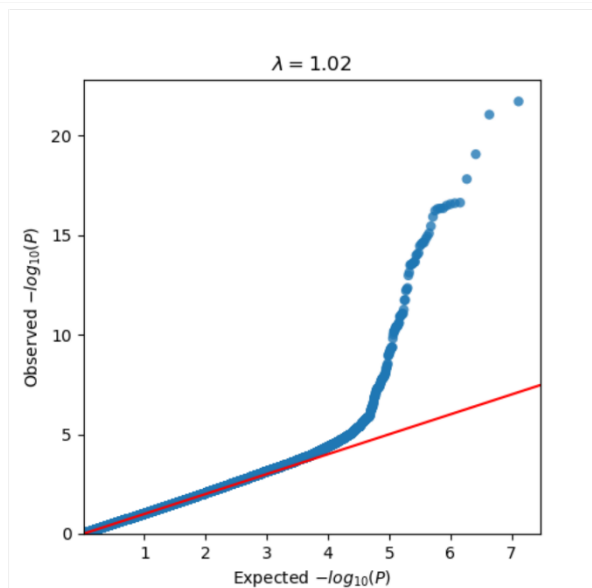

# D

438  
 439  
 440  
 441  
 442  
 443  
 444

Manhattan and QQ plots, along with genomic inflation factors and LDSC intercepts, are displayed for the primary GWAS conducted on individuals of European ancestry ( $N=111,386$ ) using PLINK and fastGWA (**A**). Additionally, results are presented for split-sample GWAS (split1 and split2, **B**), sex-stratified GWAS (female and male, **C**), and GWAS involving non-European ancestry populations ( $N=20,408$ , **D**). All P-values were two-sided, and a genome-wide P-values threshold was used.



445 **Supplementary Figure 7: GWAS Manhattan plots for the musculoskeletal BAG**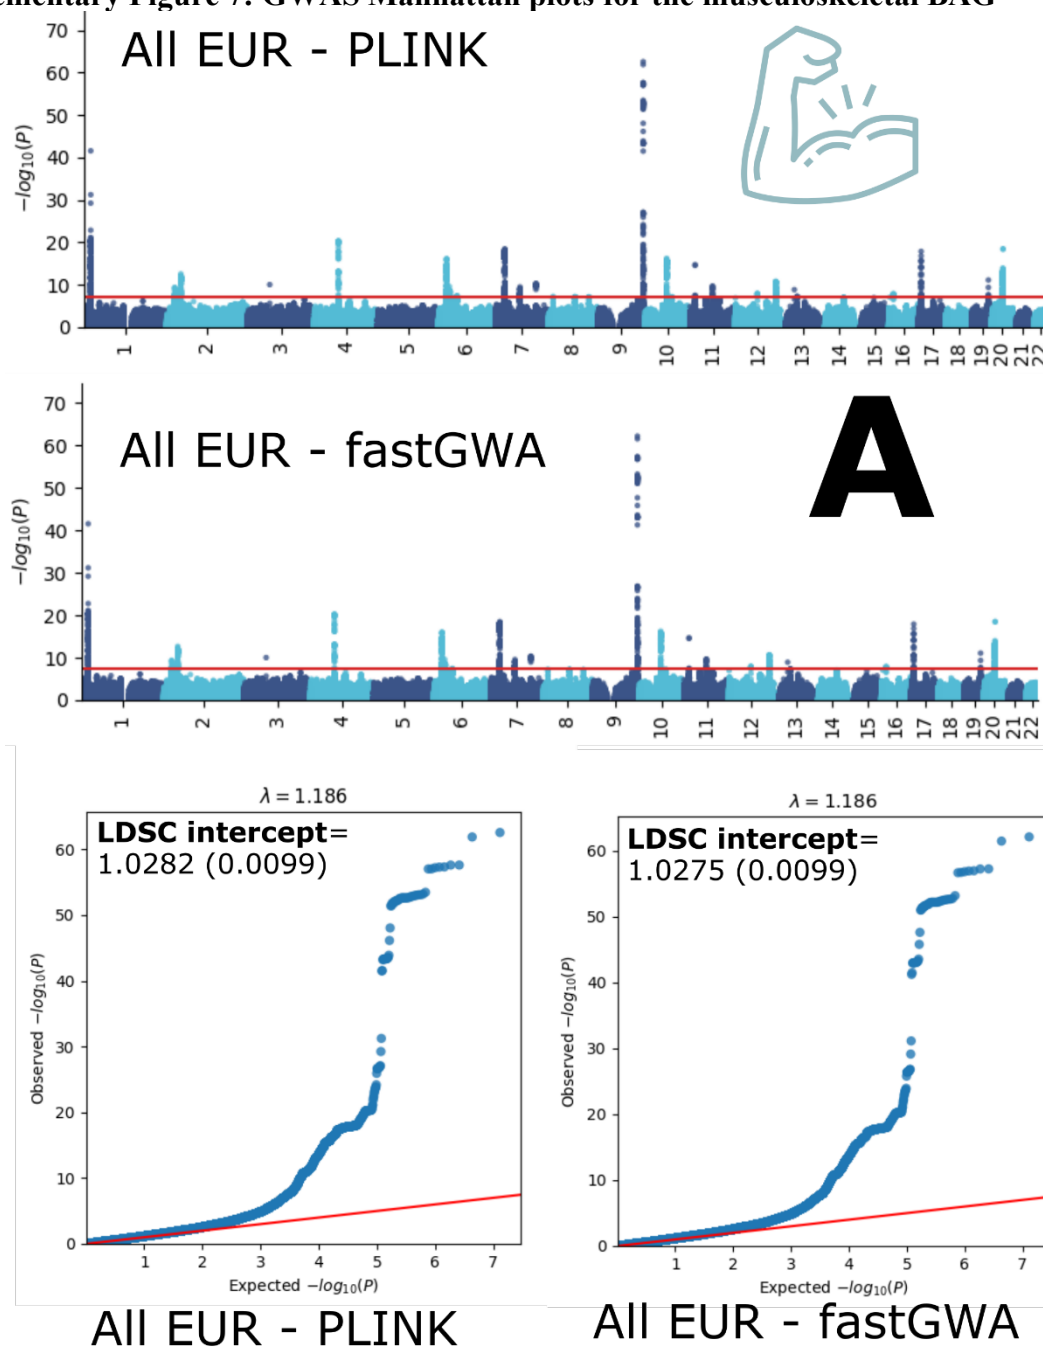

446

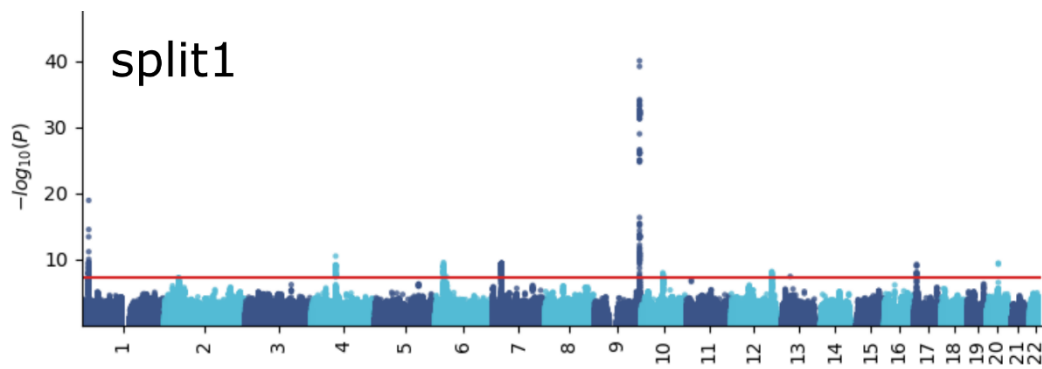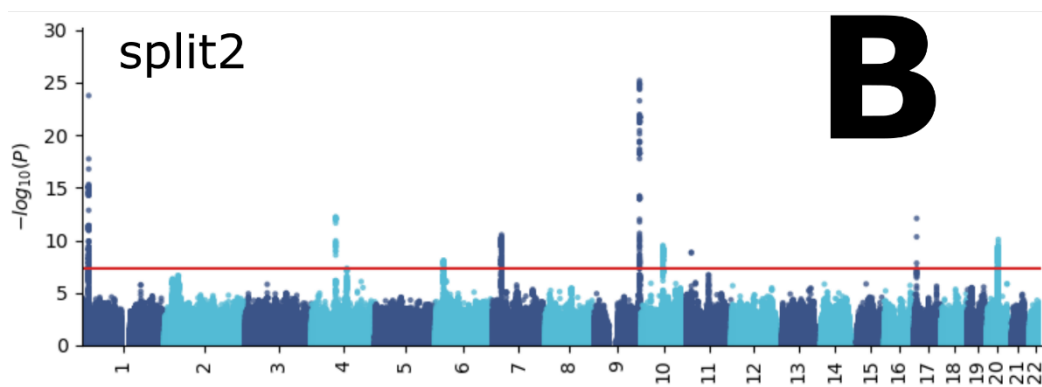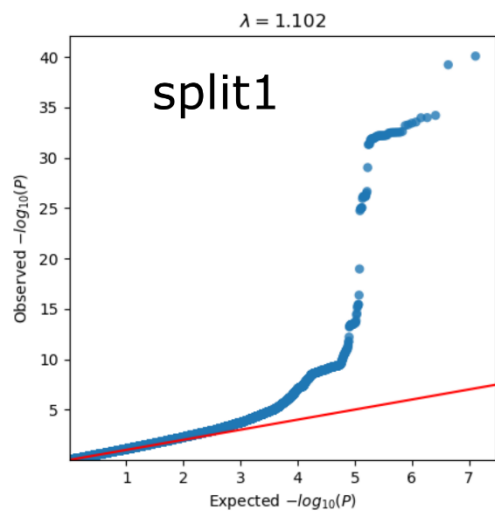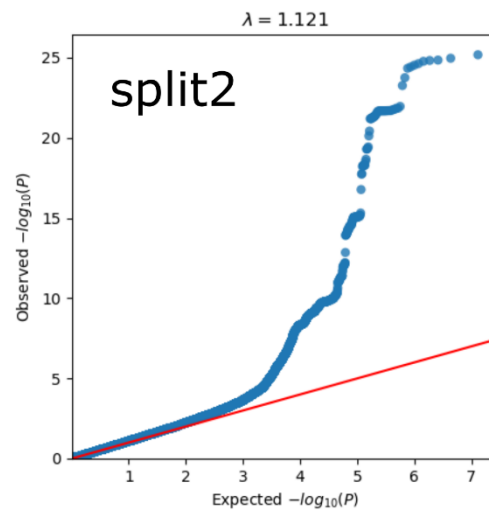

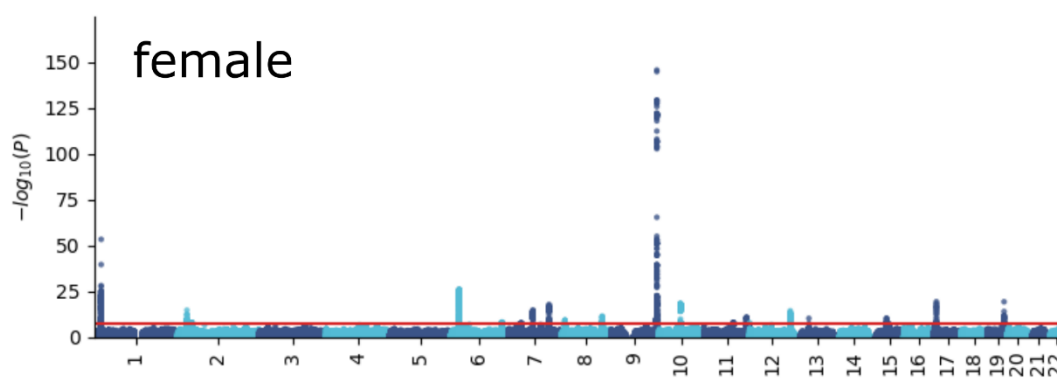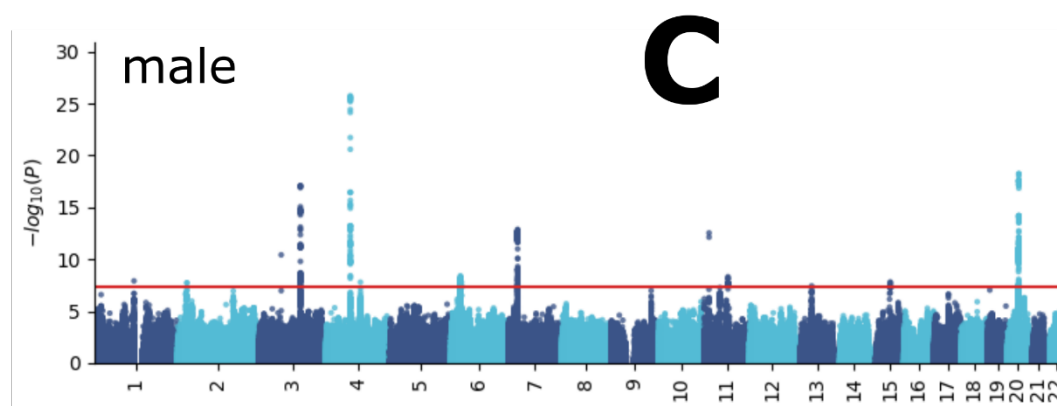

C

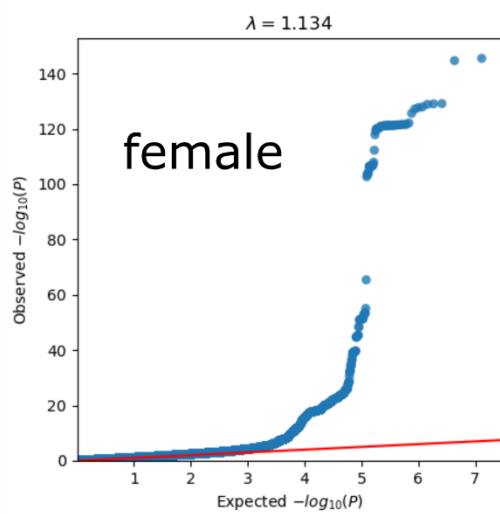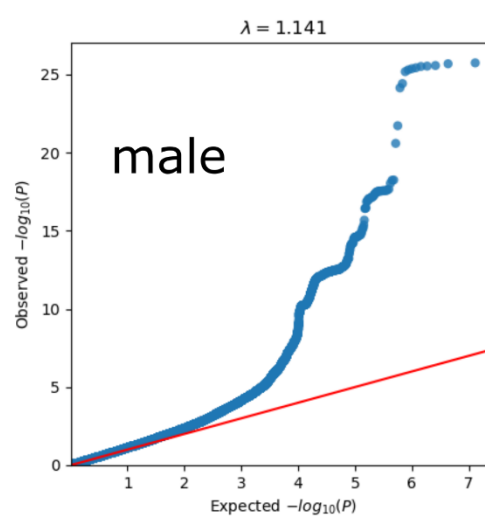

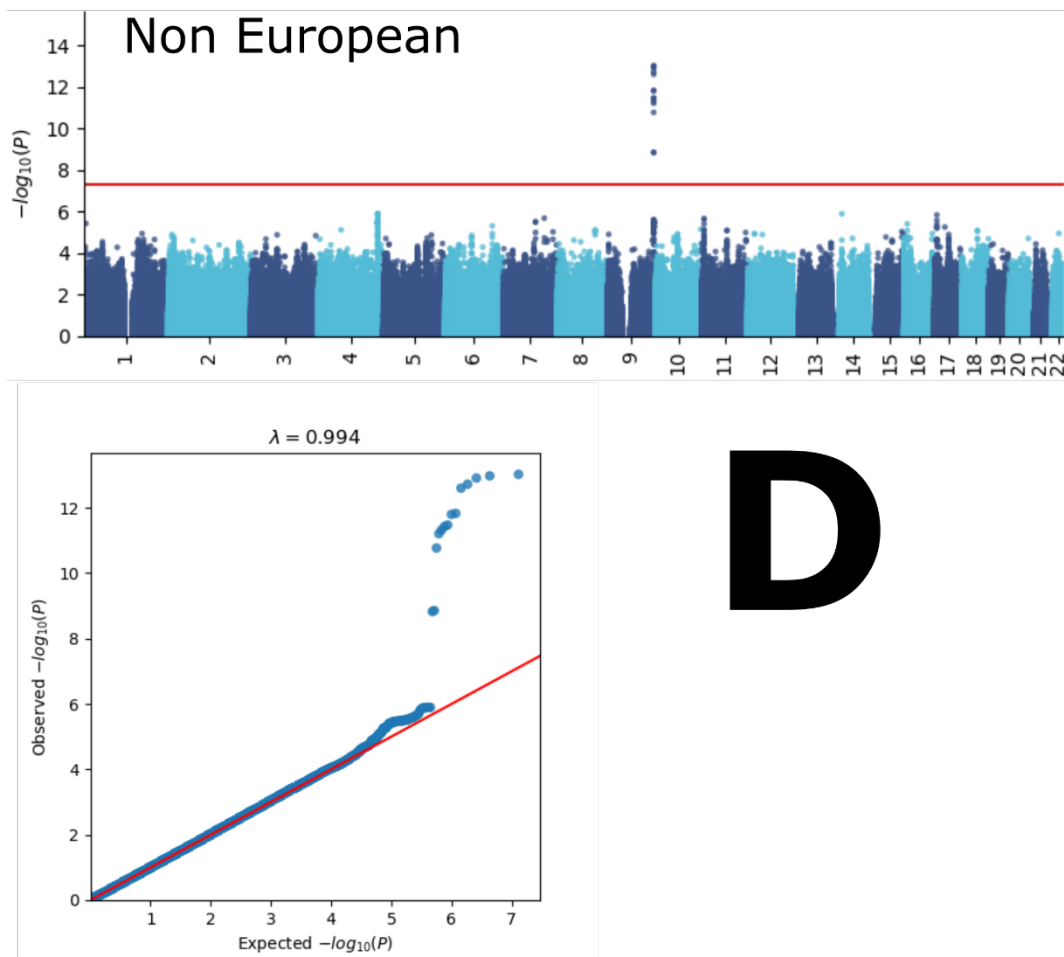

# D

449  
 450  
 451  
 452  
 453  
 454  
 455

Manhattan and QQ plots, along with genomic inflation factors and LDSC intercepts, are displayed for the primary GWAS conducted on individuals of European ancestry ( $N=111,386$ ) using PLINK and fastGWA (A). Additionally, results are presented for split-sample GWAS (split1 and split2, B), sex-stratified GWAS (female and male, C), and GWAS involving non-European ancestry populations ( $N=20,408$ , D). All P-values were two-sided, and a genome-wide P-values threshold was used.

456 **Supplementary Figure 8: GWAS Manhattan plots for the pulmonary BAG**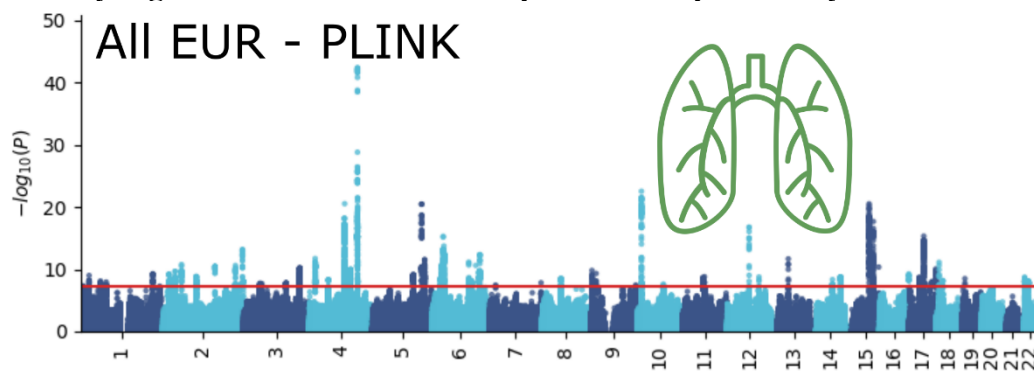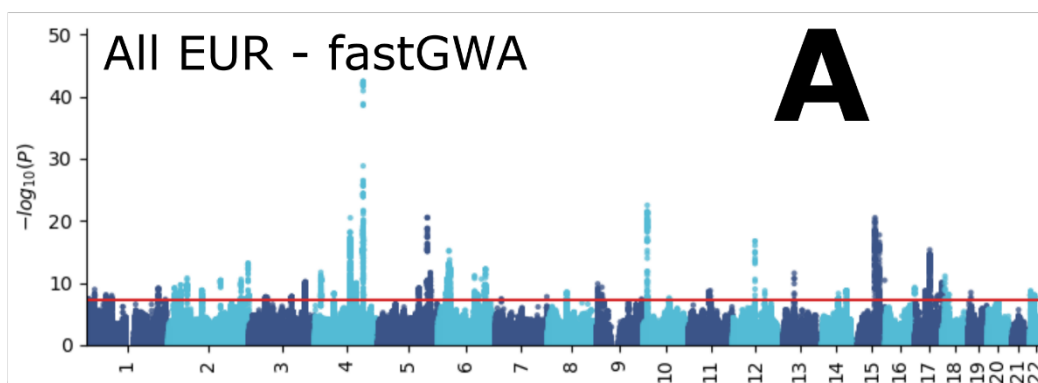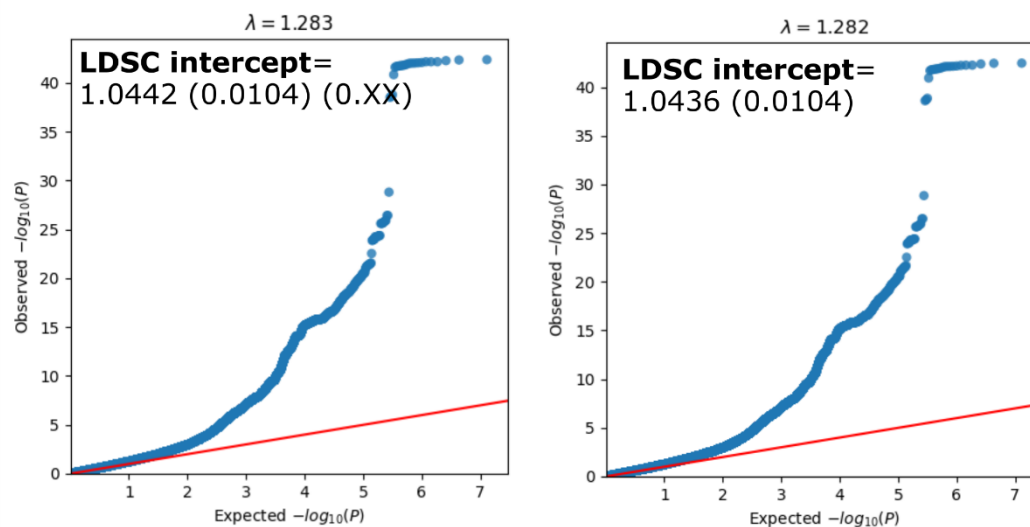

All EUR - PLINK

All EUR - fastGWA

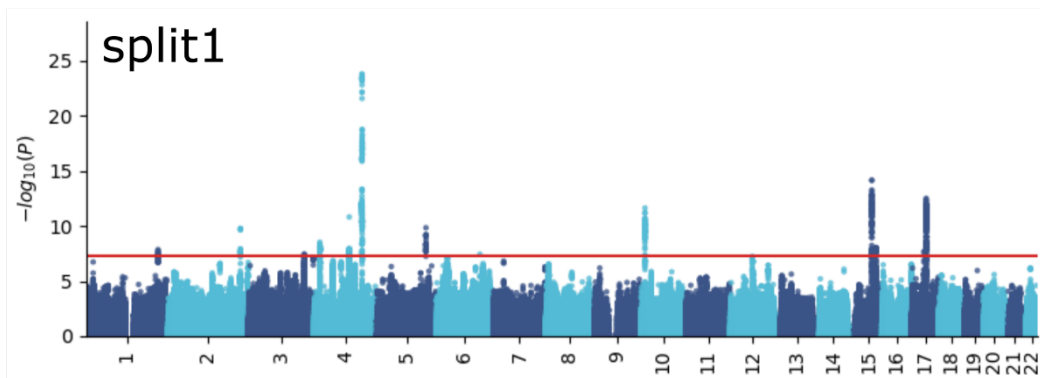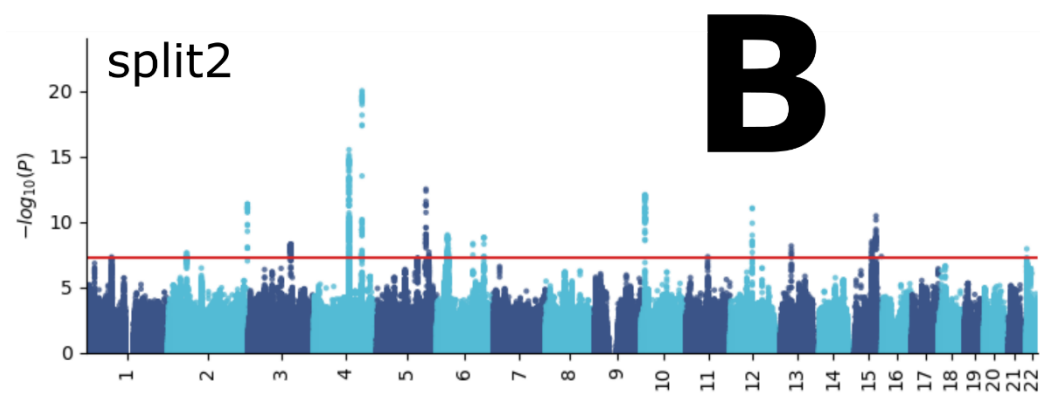**B**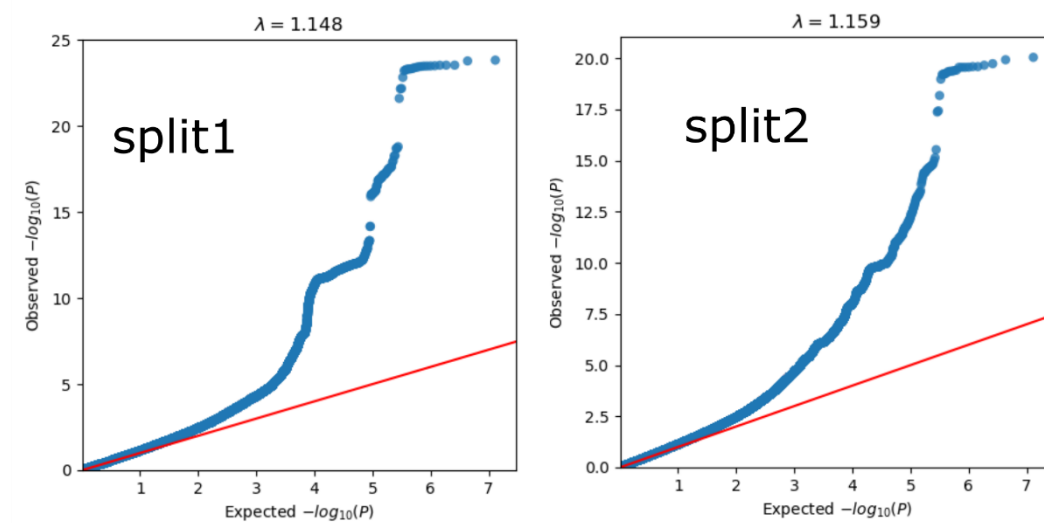

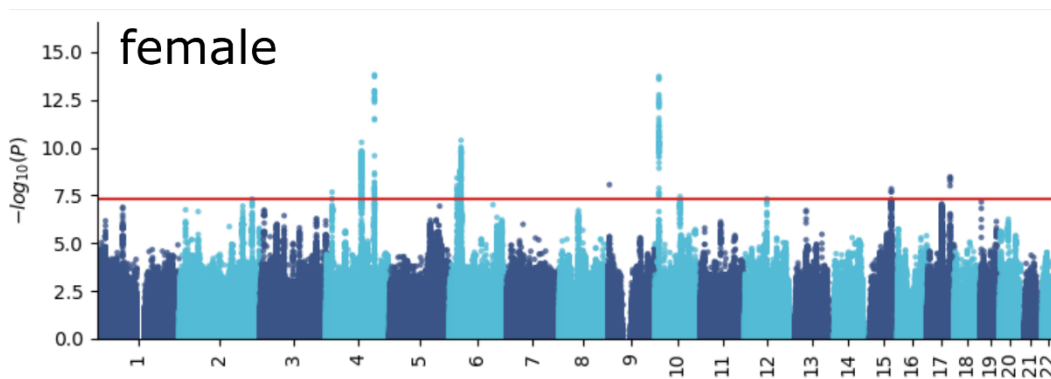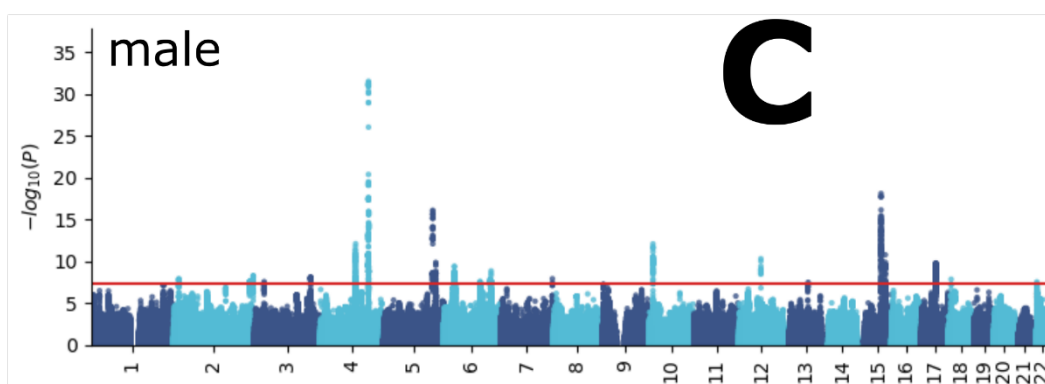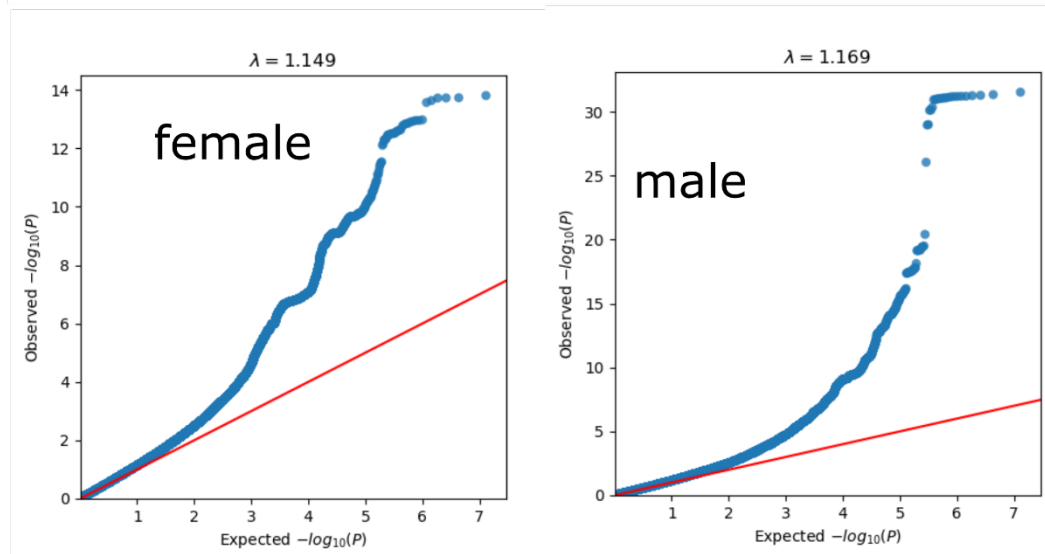

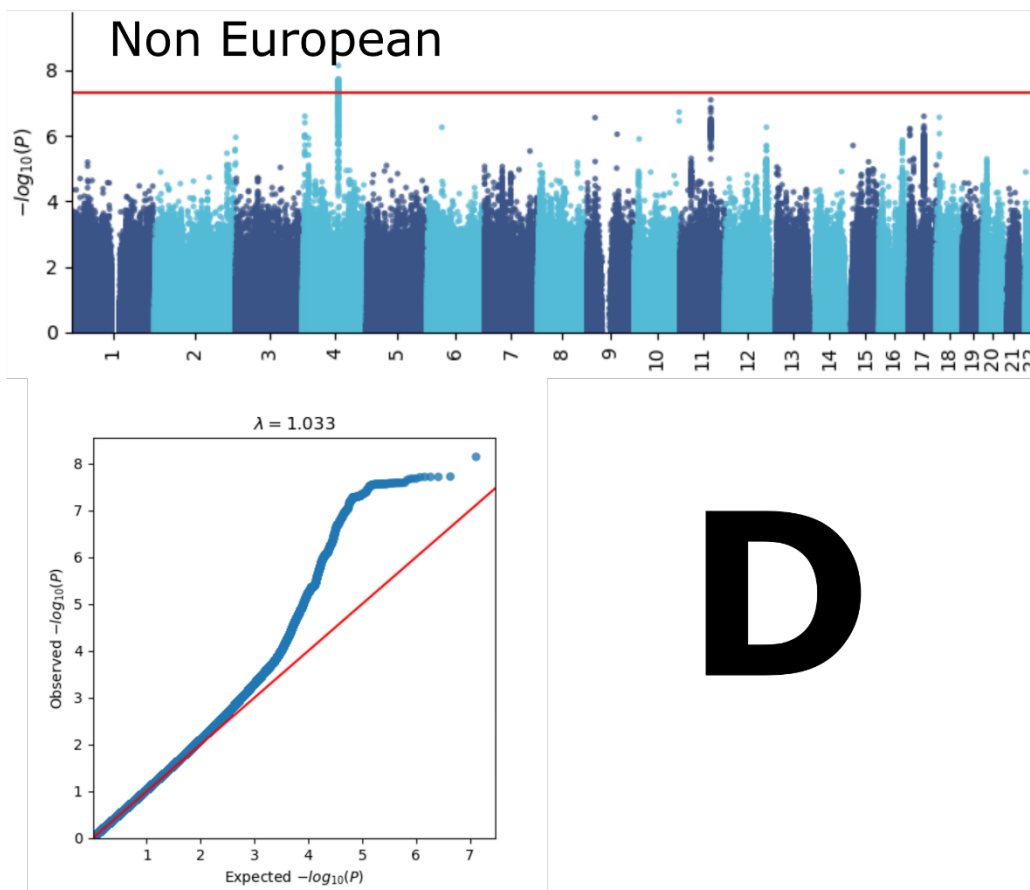

**D**

460  
 461 Manhattan and QQ plots, along with genomic inflation factors and LDSC intercepts, are  
 462 displayed for the primary GWAS conducted on individuals of European ancestry ( $N=111,386$ )  
 463 using PLINK and fastGWA (**A**). Additionally, results are presented for split-sample GWAS  
 464 (split1 and split2, **B**), sex-stratified GWAS (female and male, **C**), and GWAS involving non-  
 465 European ancestry populations ( $N=20,408$ , **D**). All P-values were two-sided, and a genome-wide  
 466 P-values threshold was used.



467 **Supplementary Figure 9: GWAS Manhatt plots for the renal BAG**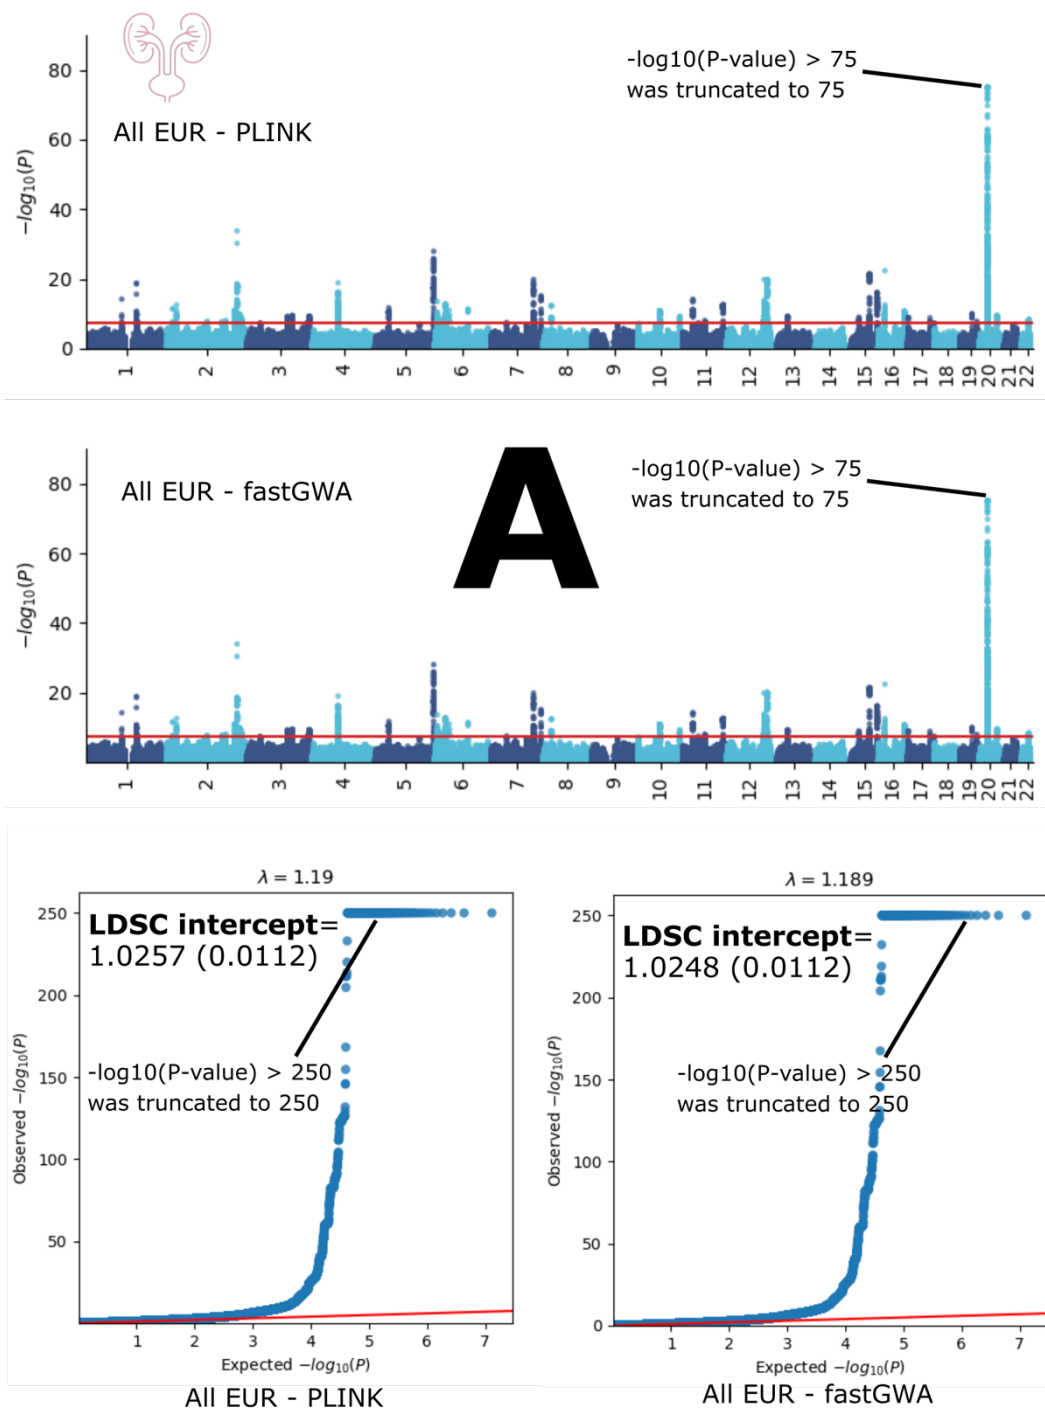

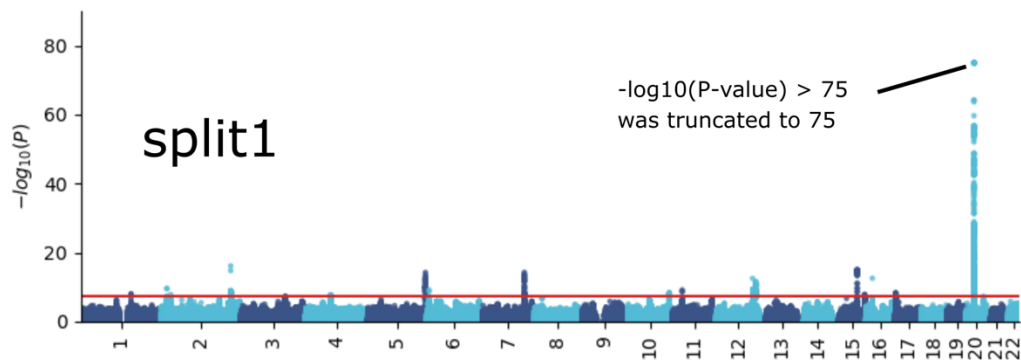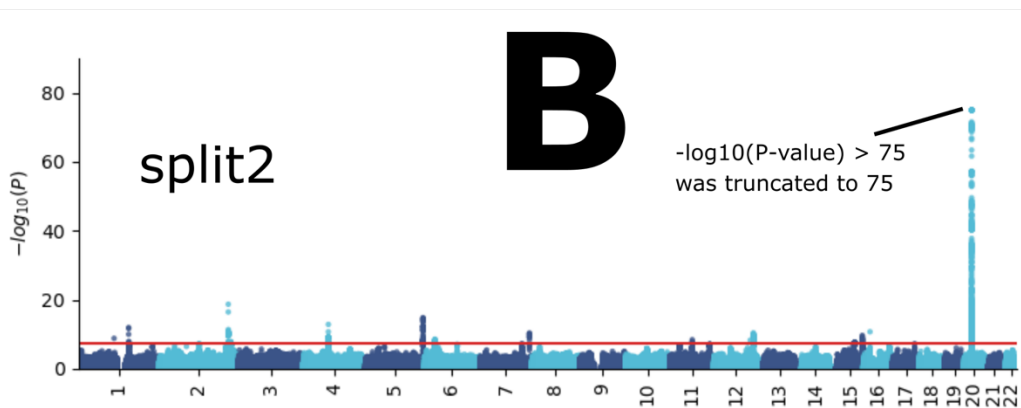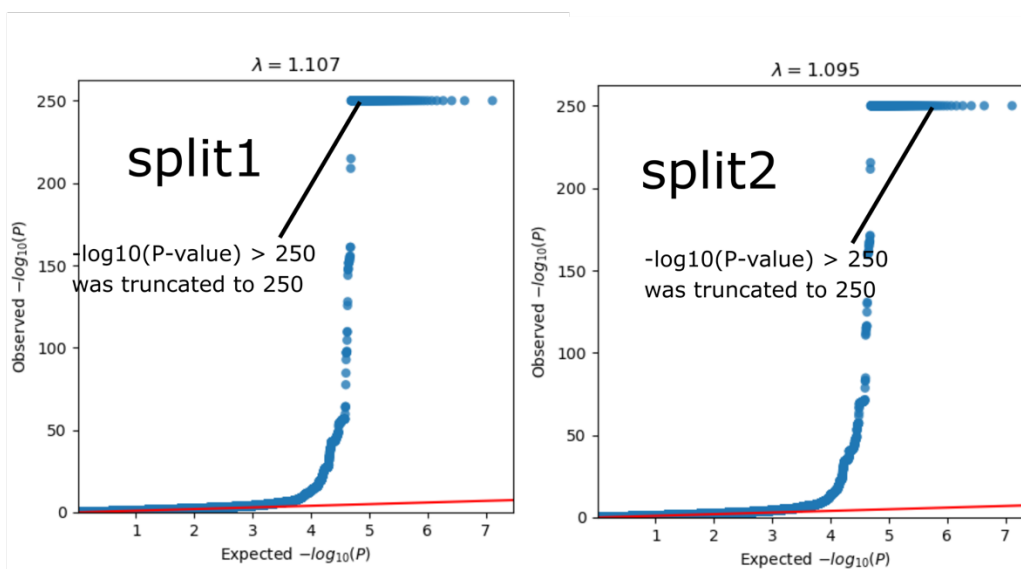

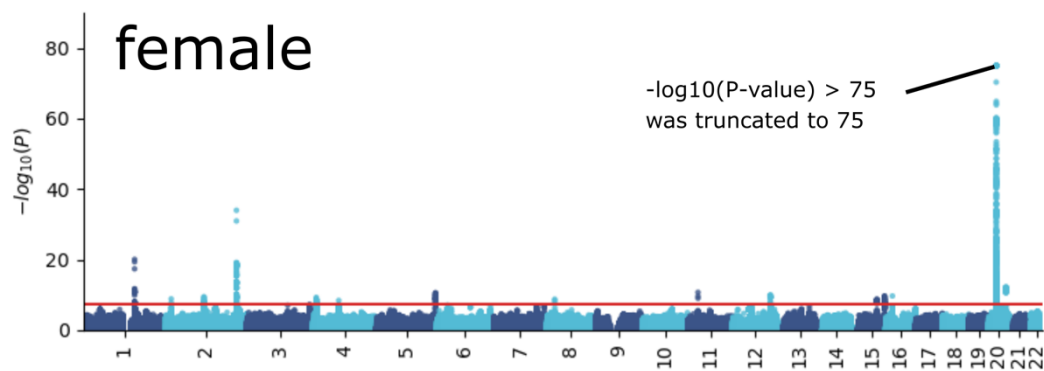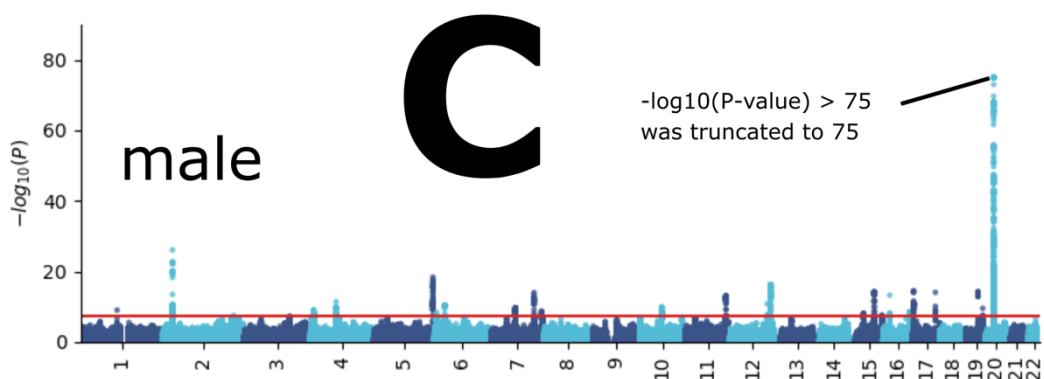

**C**

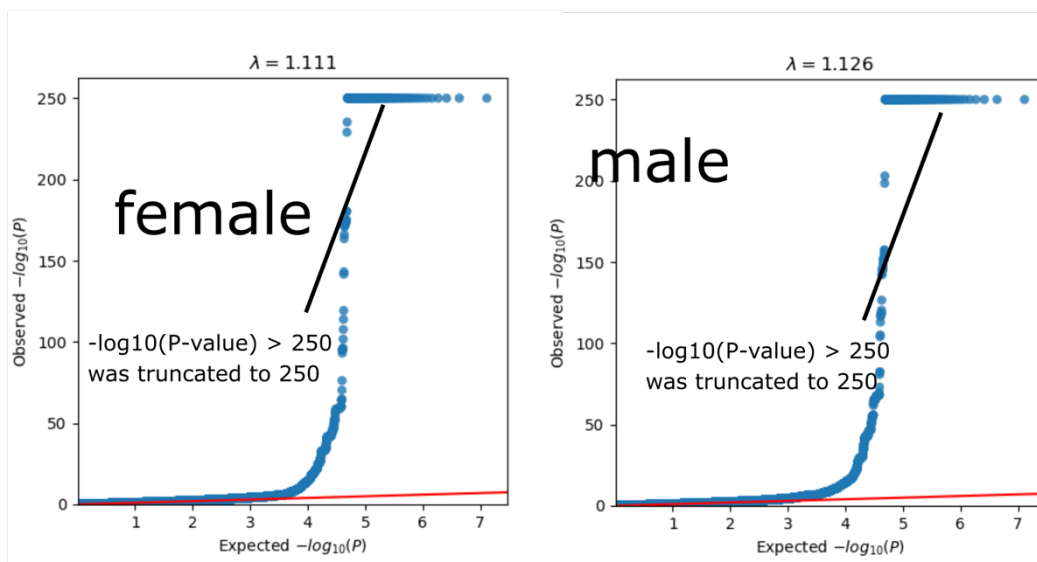

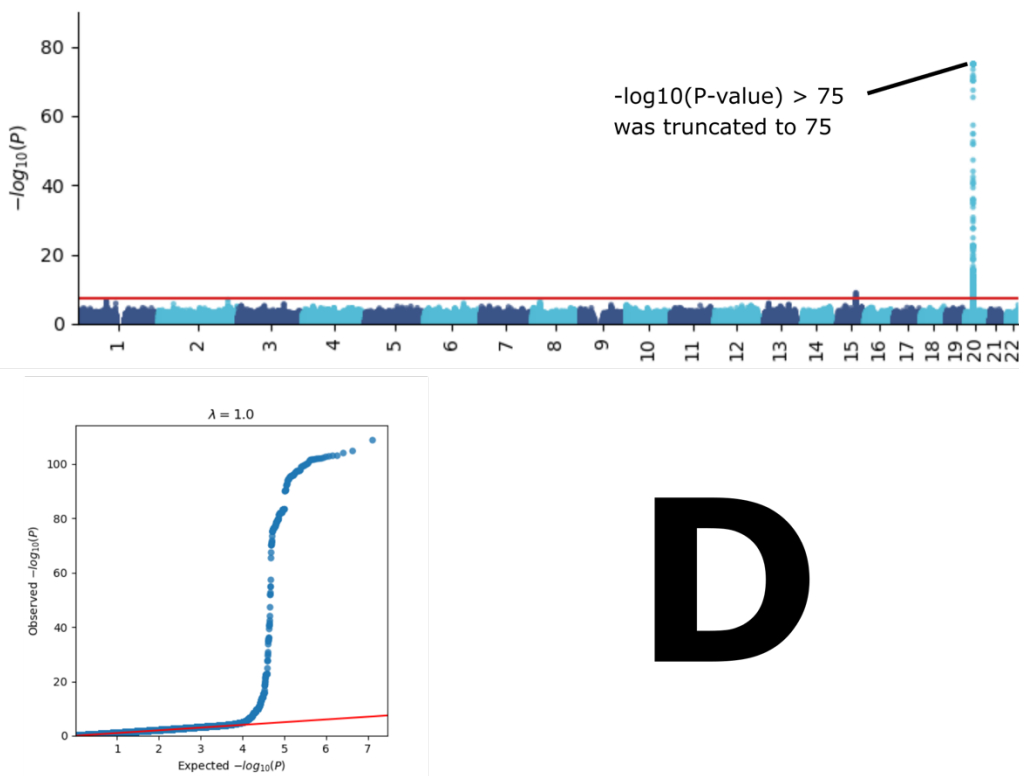

# D

471  
 472 Manhattan and QQ plots, along with genomic inflation factors and LDSC intercepts, are  
 473 displayed for the primary GWAS conducted on individuals of European ancestry ( $N=111,386$ )  
 474 using PLINK and fastGWA (**A**). Additionally, results are presented for split-sample GWAS  
 475 (split1 and split2, **B**), sex-stratified GWAS (female and male, **C**), and GWAS involving non-  
 476 European ancestry populations ( $N=20,408$ , **D**). For visualization purposes, we chose to truncate  
 477 the highly significant P-value ( $P\text{-value} < 1 \times 10^{-300}$ ) to a lower P-value ( $1 \times 10^{-75}$  for Manhattan plots  
 478 and  $1 \times 10^{-250}$  for QQ plots). All P-values were two-sided, and a genome-wide P-values threshold  
 479 was used.

480 **Supplementary Figure 10: Bayesian colocalization analysis for the locus on chromosome 6**  
 481 **between the hepatic and musculoskeletal BAGs**

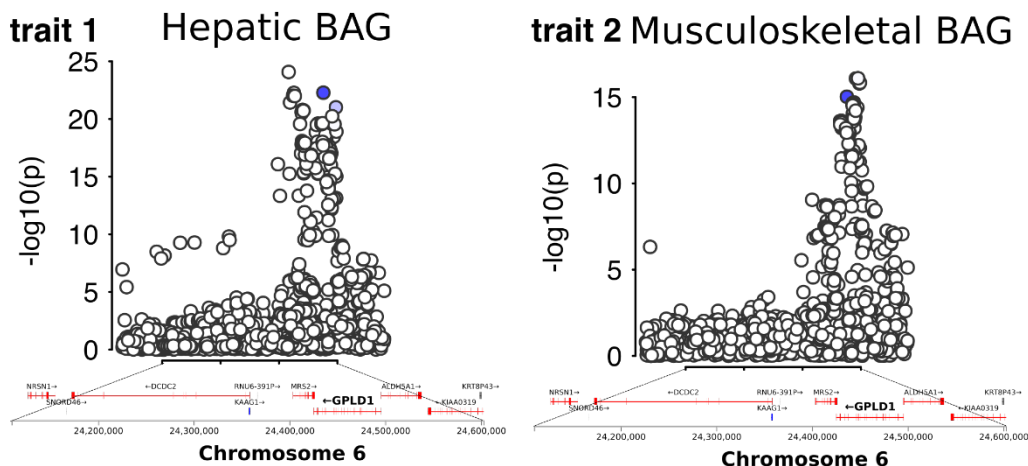

482  
 483 We conducted a Bayesian colocalization analysis using Bayes factors to investigate shared causal  
 484 variants in a specific locus on chromosome 6 for the hepatic and musculoskeletal BAGs. The  
 485 analysis tested five hypotheses, denoted by their posterior probabilities: H0 (no association with  
 486 either trait), H1 (association with trait 1 but not trait 2), H2 (association with trait 2 but not trait  
 487 1), H3 (association with both traits but with separate causal variants), and H4 (association with  
 488 both traits with a shared causal variant). The potential causal variants for both traits are indicated  
 489 by blue-colored SNPs, assuming each locus contains at most one causal variant. The gene  
 490 mapped to this locus (*GPLD1*) is shown in bold based on physical positions. All P-values were  
 491 two-sided.  
 492

493 **Supplementary Figure 11: Exemplary genomic locus for each BAG in the nine human**  
 494 **organ systems**

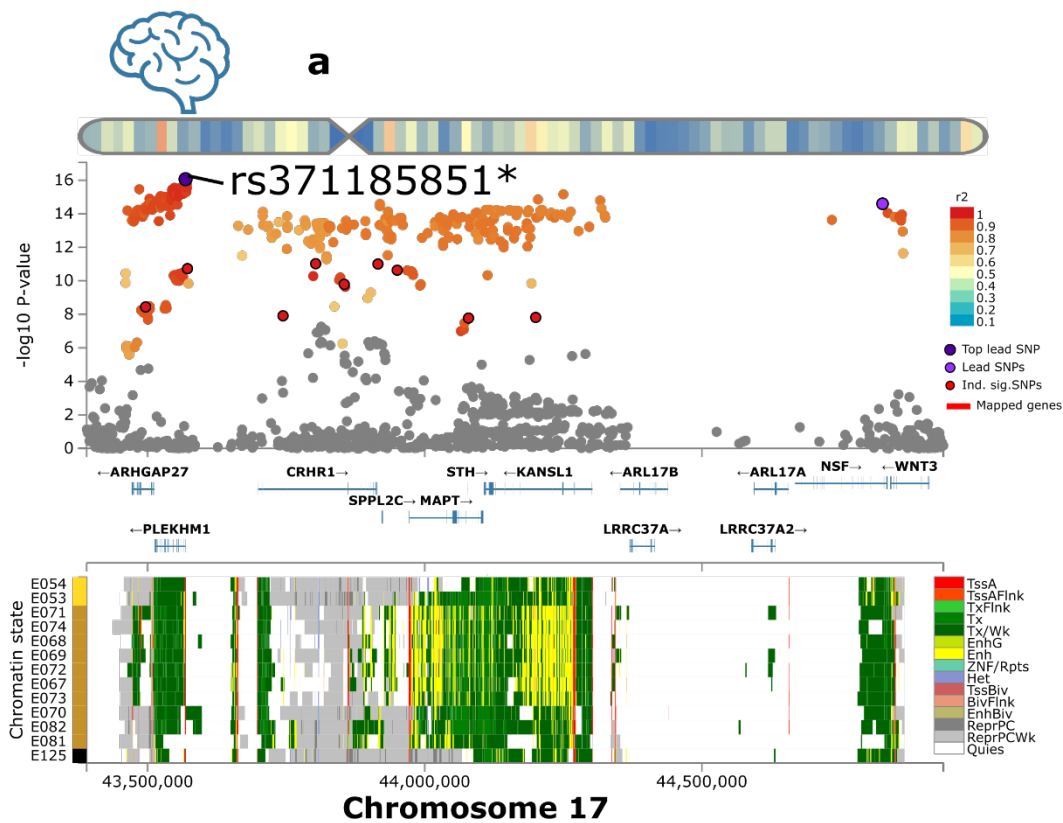

495

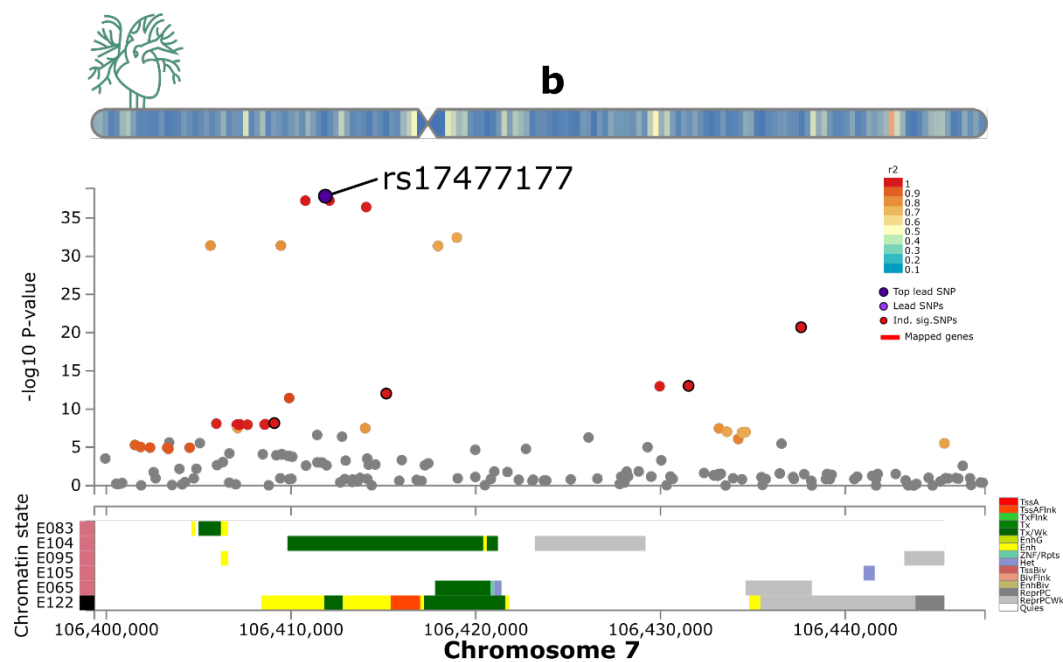

496

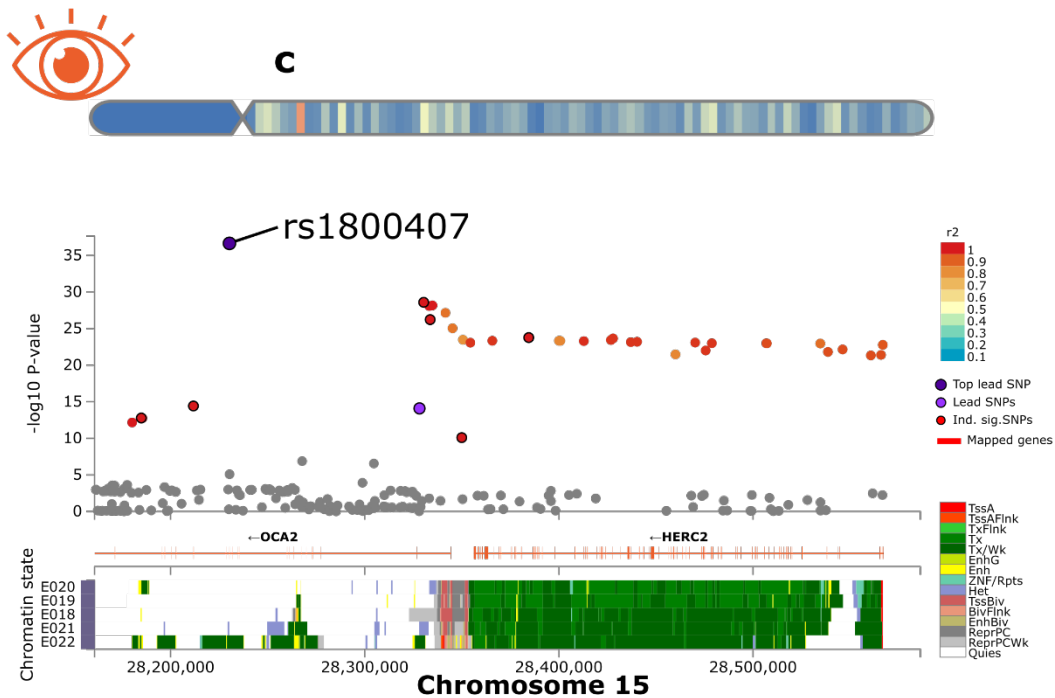

497

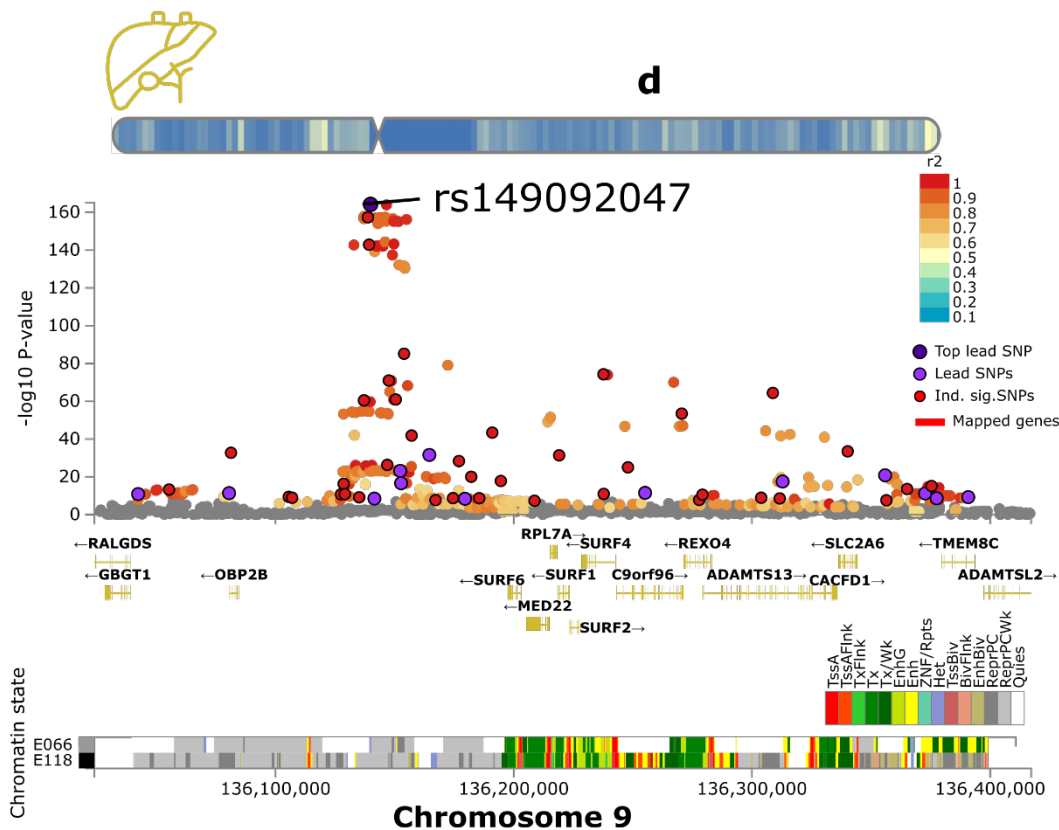

498

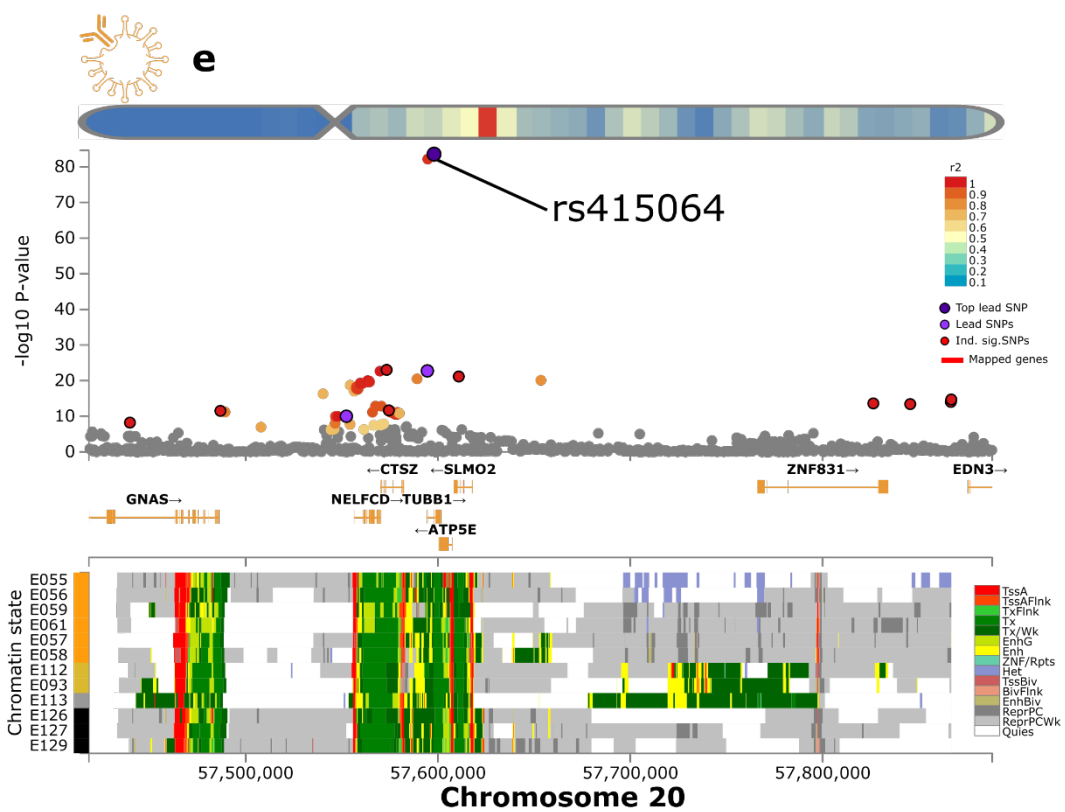

499

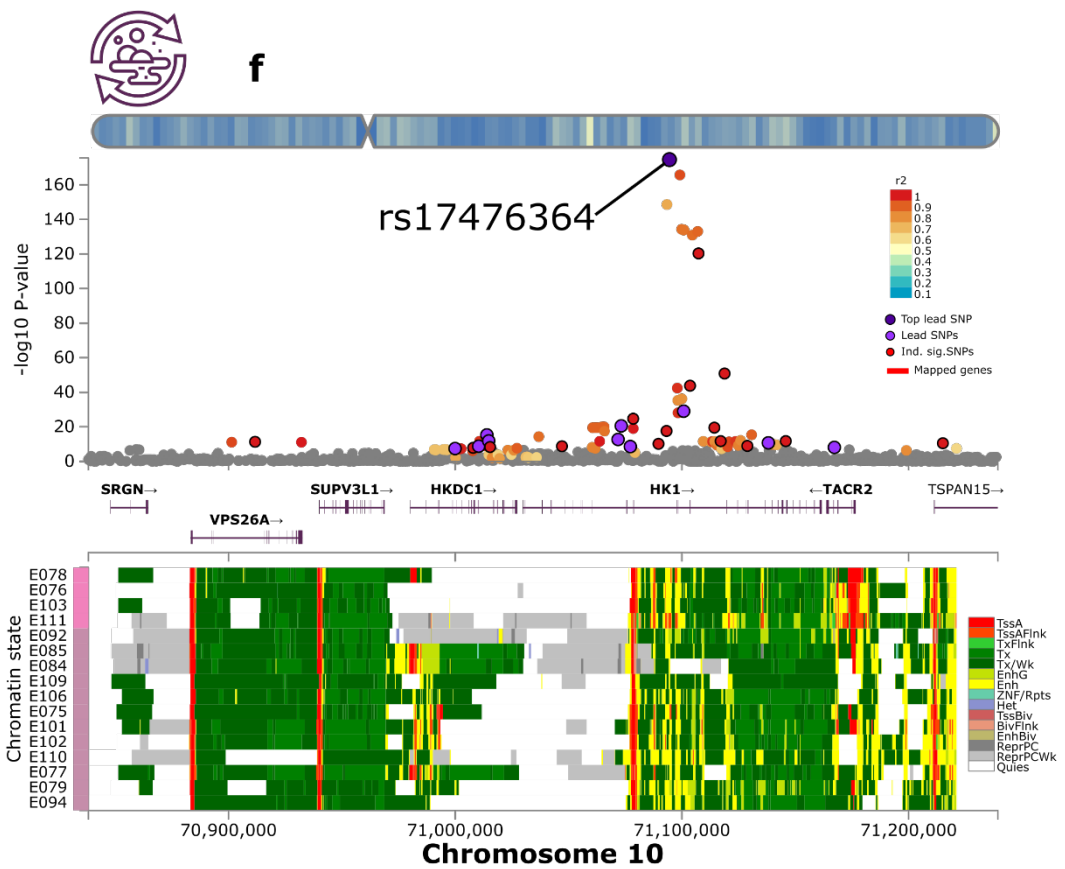

500



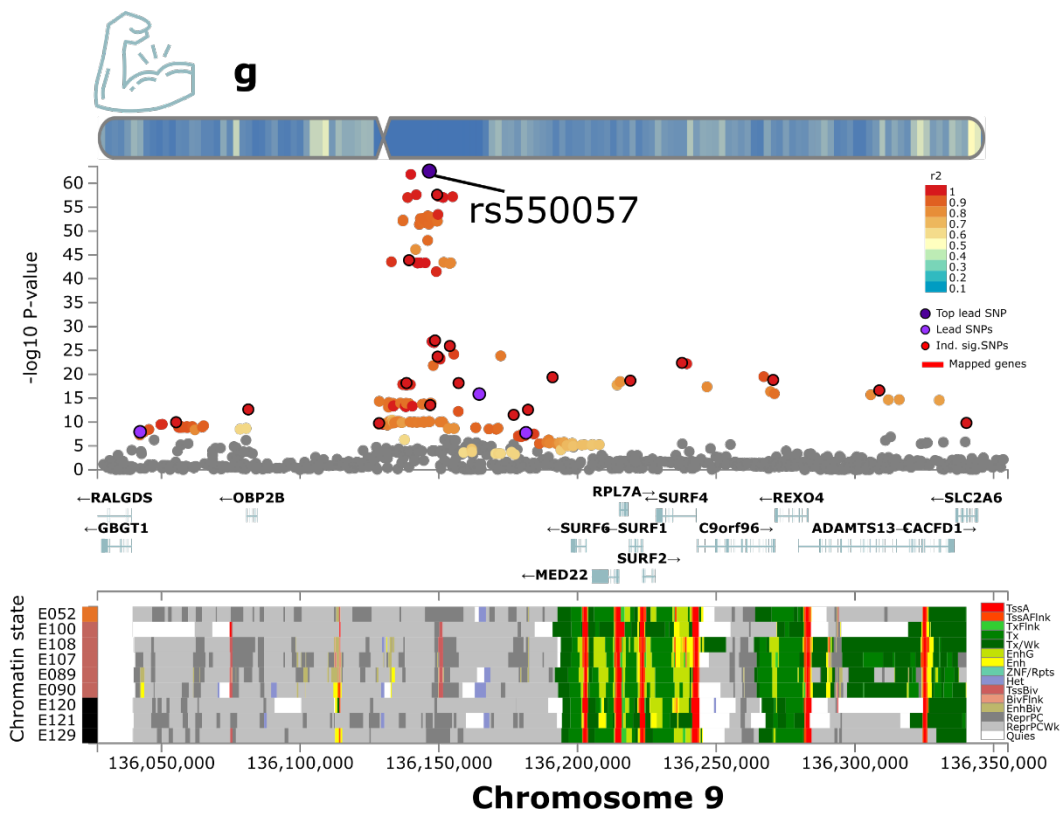

501

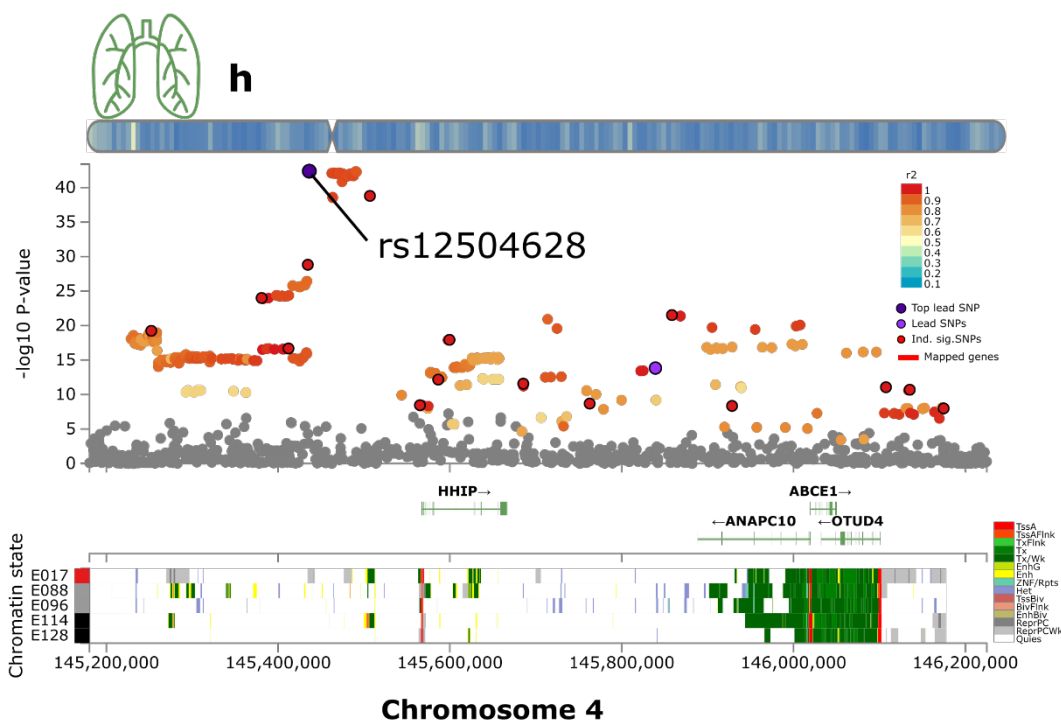

502

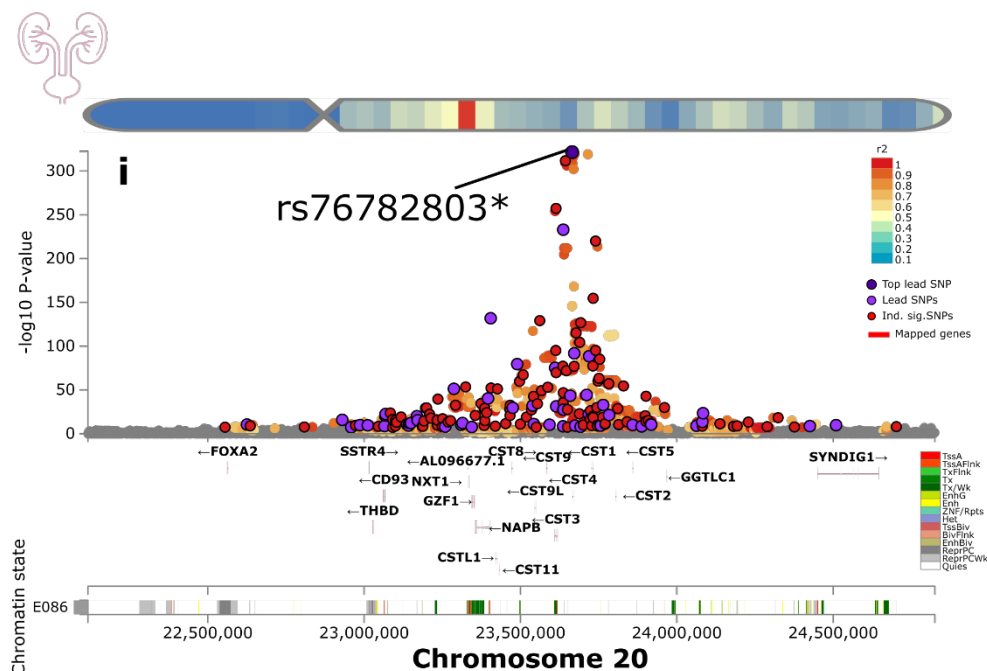

503  
 504 **a-i)** The exemplary genomic locus with the most significant signals for the brain, cardiovascular,  
 505 eye, hepatic, immune, metabolic, musculoskeletal, pulmonary, and renal BAGs. The top lead  
 506 SNP, lead SNPs, and independent significant SNPs are annotated within each locus. We mapped  
 507 the SNPs to the genes and predicted their chromatin states in specific tissues, including the brain  
 508 for the brain BAG, the heart and vascular tissues for the cardiovascular BAG, the iPSC for the  
 509 eye BAG, the liver for the hepatic BAG, the spleen, bone, skin, and thymus tissues for the  
 510 immune BAG, the gastrointestinal tissue for the metabolic BAG, the muscle and bone tissues for  
 511 the musculoskeletal BAG, the lung tissue for the pulmonary BAG, and the kidney for the renal  
 512 BAG, respectively. All P-values were two-sided, and a genome-wide P-values threshold was  
 513 used.  
 514

515 **Supplementary Figure 12.** Phenome-wide association query of the identified genomic loci in  
 516 the GWAS Atlas platforms.

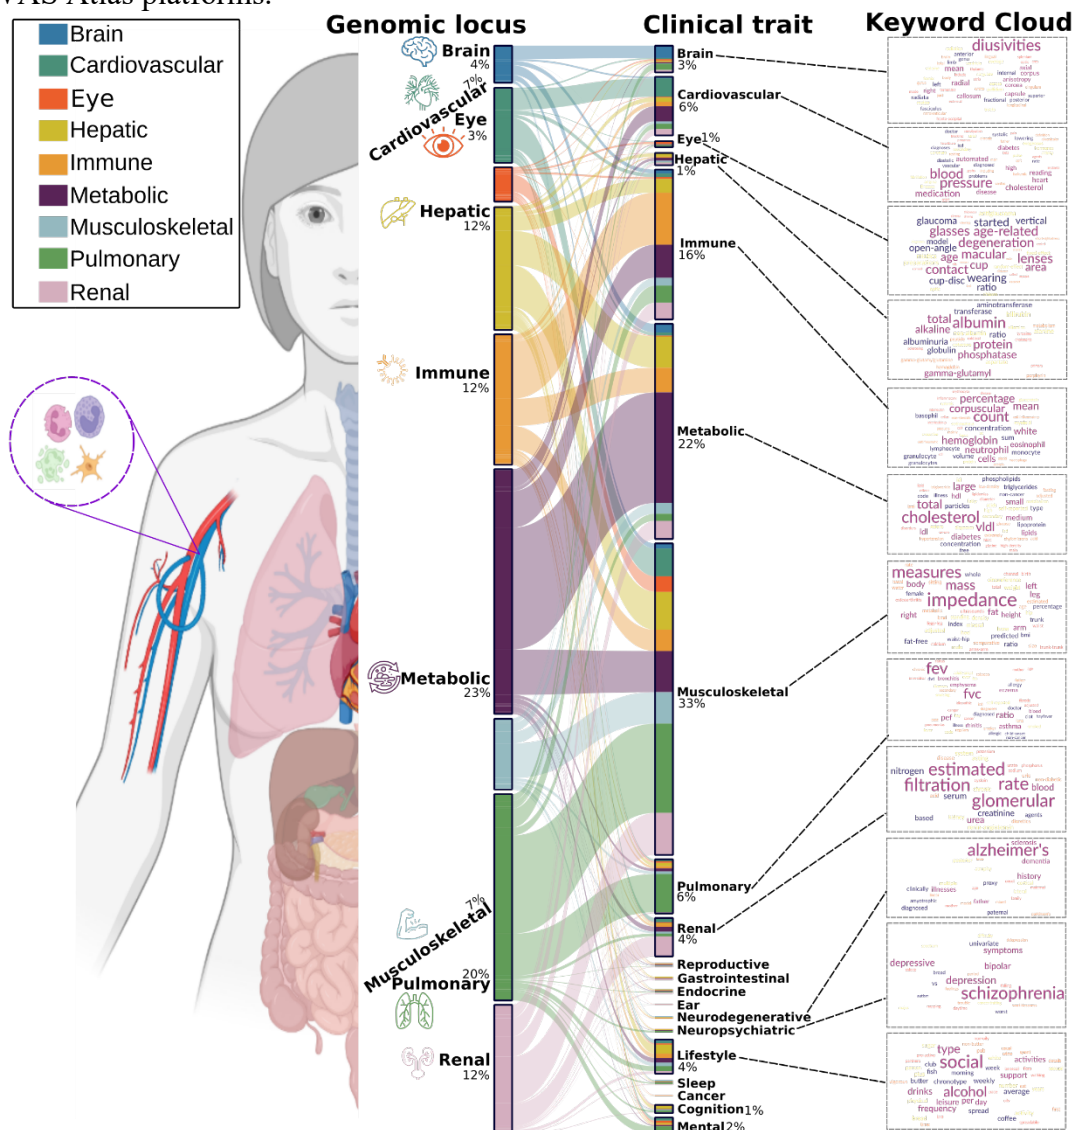

517  
 518  
 519 By examining the independent significant SNPs considering linkage disequilibrium within each  
 520 genomic locus, we linked them to various clinical traits. These traits were categorized into high-  
 521 level groups encompassing different organ systems, neurodegenerative and neuropsychiatric  
 522 disorders, and lifestyle factors. To visually represent the findings, we generated keyword cloud  
 523 plots based on the frequency of these clinical traits within each BAG. The length of each  
 524 rectangle block indicates the number of associations concerning the genomic loci in our analysis  
 525 and clinical traits in the literature. The individual disease traits were categorized within their  
 526 respective organ systems. However, this categorization doesn't imply that the sum of these  
 527 diseases exclusively represents the entirety of the organ system or that these diseases are solely  
 528 associated with one specific organ system.

529 **Supplementary Figure 13: Manhattan and QQ plots for the four pulmonary features used**  
 530 **to compute the pulmonary BAG**

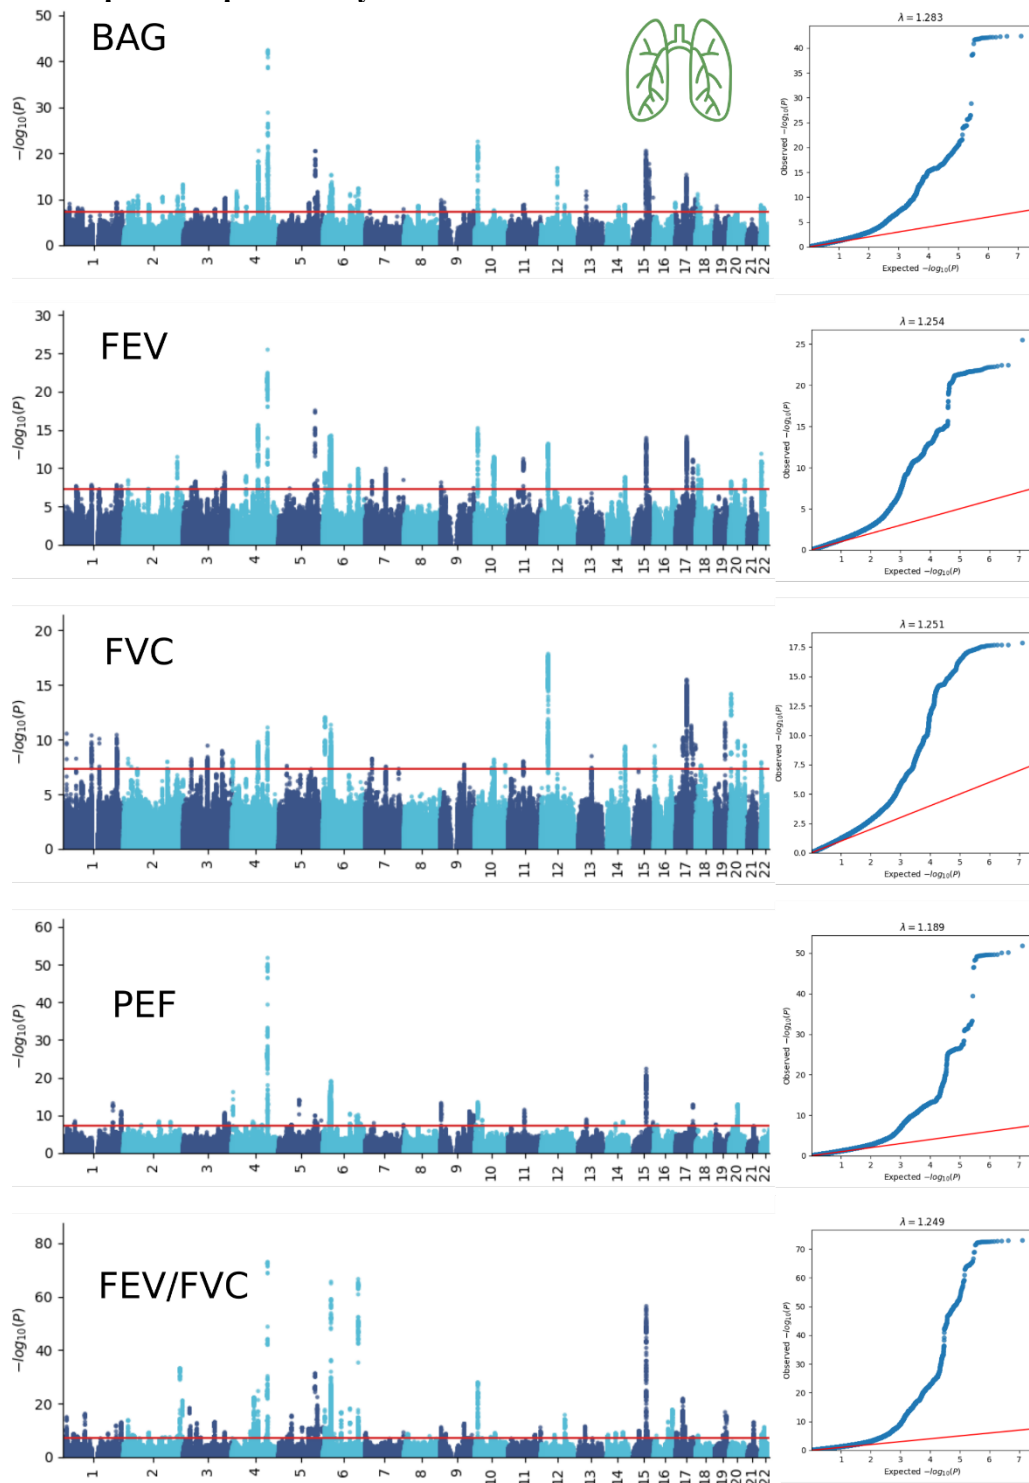

531 The Manhattan and QQ plots for the pulmonary BAG vs. its four features used to compute the  
 532 BAG: forced vital capacity (FVC), forced expiratory volume (FEV), peak expiratory flow (PEF),  
 533 and the ratio of forced expiratory volume to forced vital capacity (FEV/FVC). All P-values were  
 534 two-sided.  
 535



537 **Supplementary Figure 14: Beta coefficients of the significant colocalization signal between**  
 538 **the pulmonary BAG and the four pulmonary features**

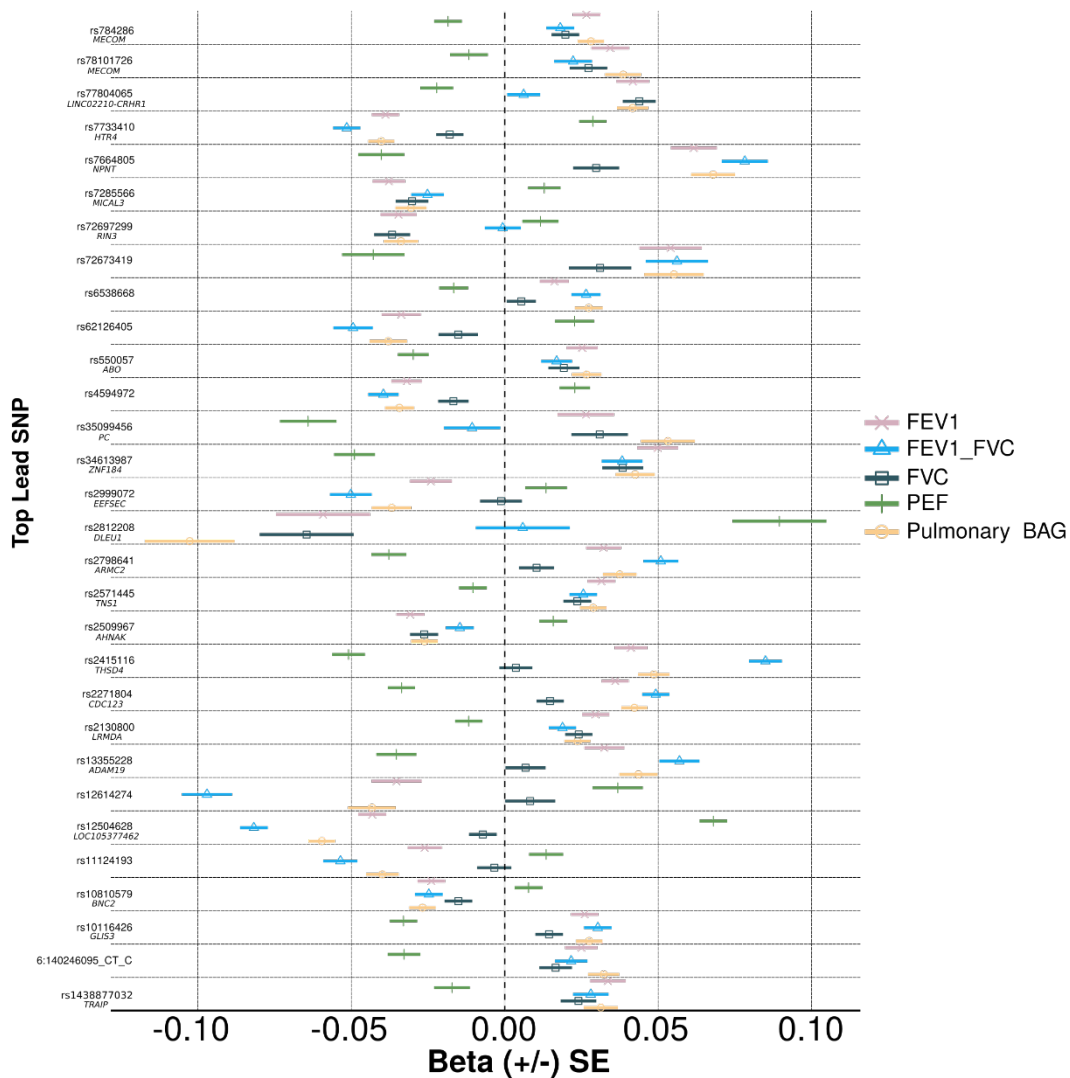

539 We show the beta coefficients of the significant colocalization signals between the pulmonary  
 540 BAG and its underlying four pulmonary features. We ensured that at least one of the four  
 541 pulmonary features achieved the genome-wide P-value threshold, totaling 48 loci (represented by  
 542 its top lead SNP). We also showed the mapped gene when available. All P-values were two-  
 543 sided.  
 544  
 545

546 **Supplementary Figure 15: Mendelian randomization sensitivity check for the hepatic BAG**  
 547 **on the musculoskeletal BAG**

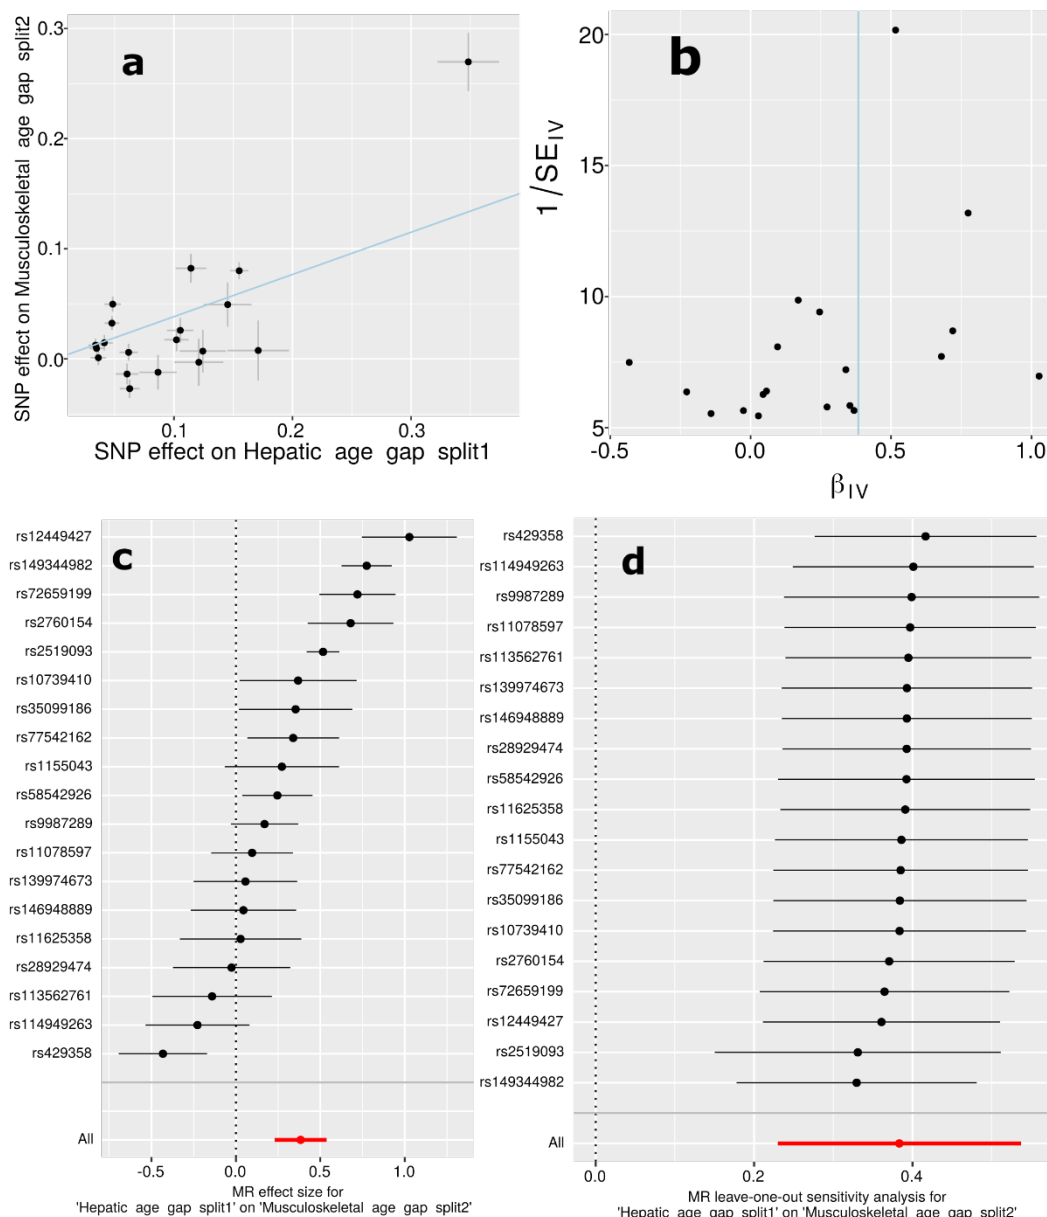

548 **a)** Scatter plot for the MR effect sizes of the exposure variable (hepatic BAG, x-axis, SD units)  
 549 and the outcome variable (musculoskeletal BAG, y-axis, log OR) with standard error bars. The  
 550 slopes of the regression line correspond to the causal effect sizes estimated by the IVW  
 551 estimator. **b)** Funnel plot for the relationship between the causal effect of the exposure variable  
 552 on the outcome variable. Each dot represents MR effect sizes estimated using each SNP as a  
 553 separate instrument against the inverse of the standard error of the causal estimate. The vertical  
 554 red line shows the MR estimates using all SNPs. **c)** Forest plot for the single-SNP MR results.  
 555 Each line represents the MR effect (log OR) for the exposure variable on the outcome variable  
 556 using only one SNP; the red line shows the MR effect using all SNPs together. **d)** Leave-one-out  
 557 analysis of the exposure variable on the outcome variable. Each row represents the MR effect  
 558

559 (log OR) and the 95% CI by excluding that SNP from the analysis. The red line depicts the IVW  
560 estimator using all SNPs. The sample size of the BAGs is indicated in the GWAS summary  
561 statistics publicly shared on the MEDICINE portal. The measure of the center for the error bars  
562 represents the inferred statistics.  
563



564 **Supplementary Figure 16: Mendelian randomization sensitivity check for the**  
 565 **musculoskeletal BAG on the hepatic BAG**

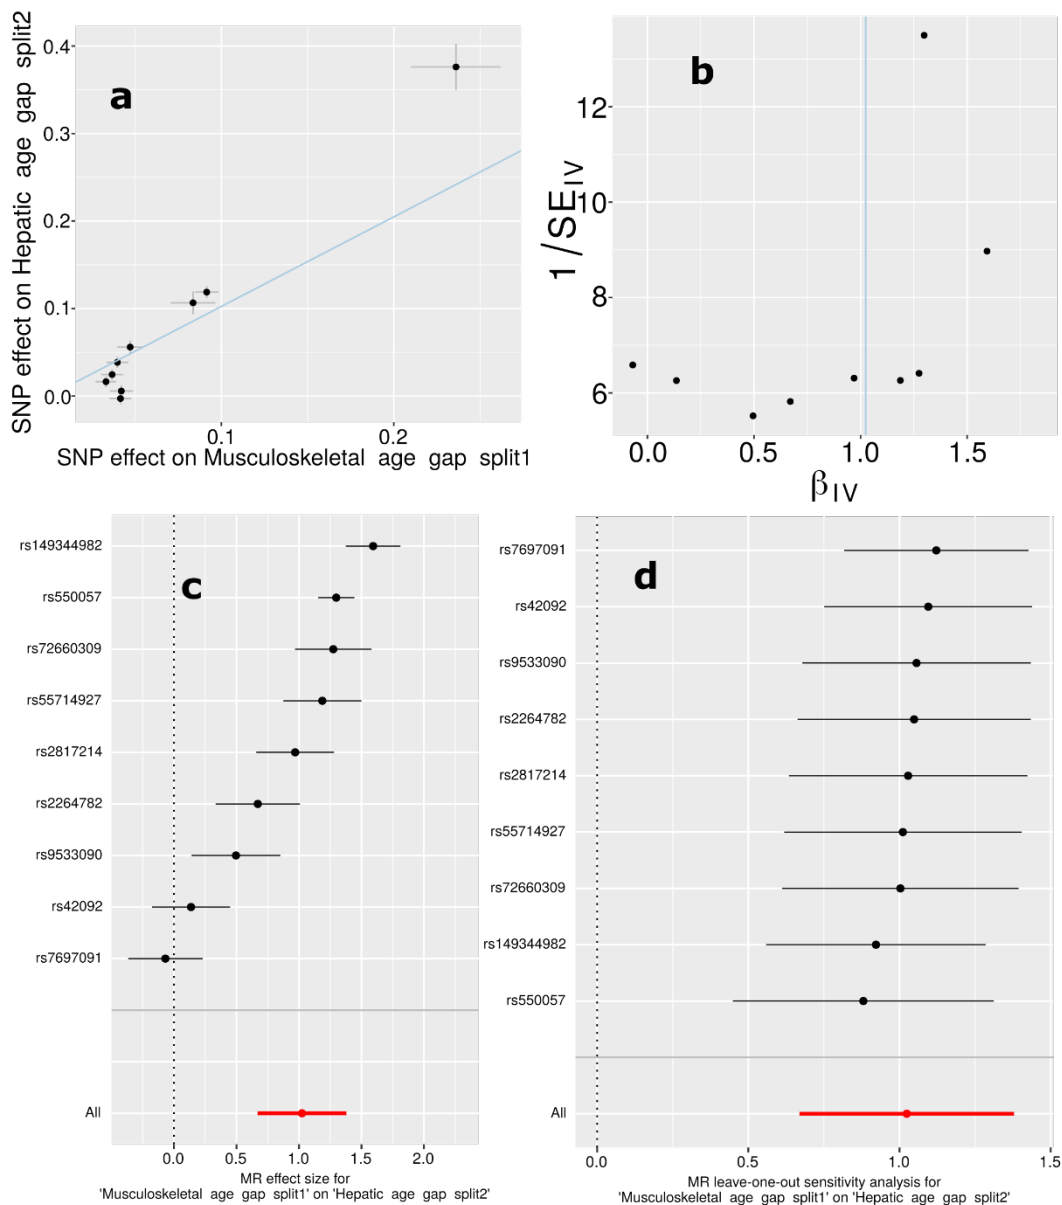

566  
 567 **a)** Scatter plot for the MR effect sizes of the exposure variable (musculoskeletal BAG, x-axis,  
 568 SD units) and the outcome variable (hepatic BAG, y-axis, log OR) with standard error bars. The  
 569 slopes of the regression line correspond to the causal effect sizes estimated by the IVW  
 570 estimator. **b)** Funnel plot for the relationship between the causal effect of the exposure variable  
 571 on the outcome variable. Each dot represents MR effect sizes estimated using each SNP as a  
 572 separate instrument against the inverse of the standard error of the causal estimate. The vertical  
 573 red line shows the MR estimates using all SNPs. **c)** Forest plot for the single-SNP MR results.  
 574 Each line represents the MR effect (log OR) for the exposure variable on the outcome variable  
 575 using only one SNP; the red line shows the MR effect using all SNPs together. **d)** Leave-one-out  
 576 analysis of the exposure variable on the outcome variable. Each row represents the MR effect

577 (log OR) and the 95% CI by excluding that SNP from the analysis. The red line depicts the IVW  
578 estimator using all SNPs. The sample size of the BAGs is indicated in the GWAS summary  
579 statistics publicly shared on the MEDICINE portal. The measure of the center for the error bars  
580 represents the inferred statistics.  
581

582 **Supplementary Figure 17: Mendelian randomization sensitivity check for AD on the brain**  
 583 **BAG**

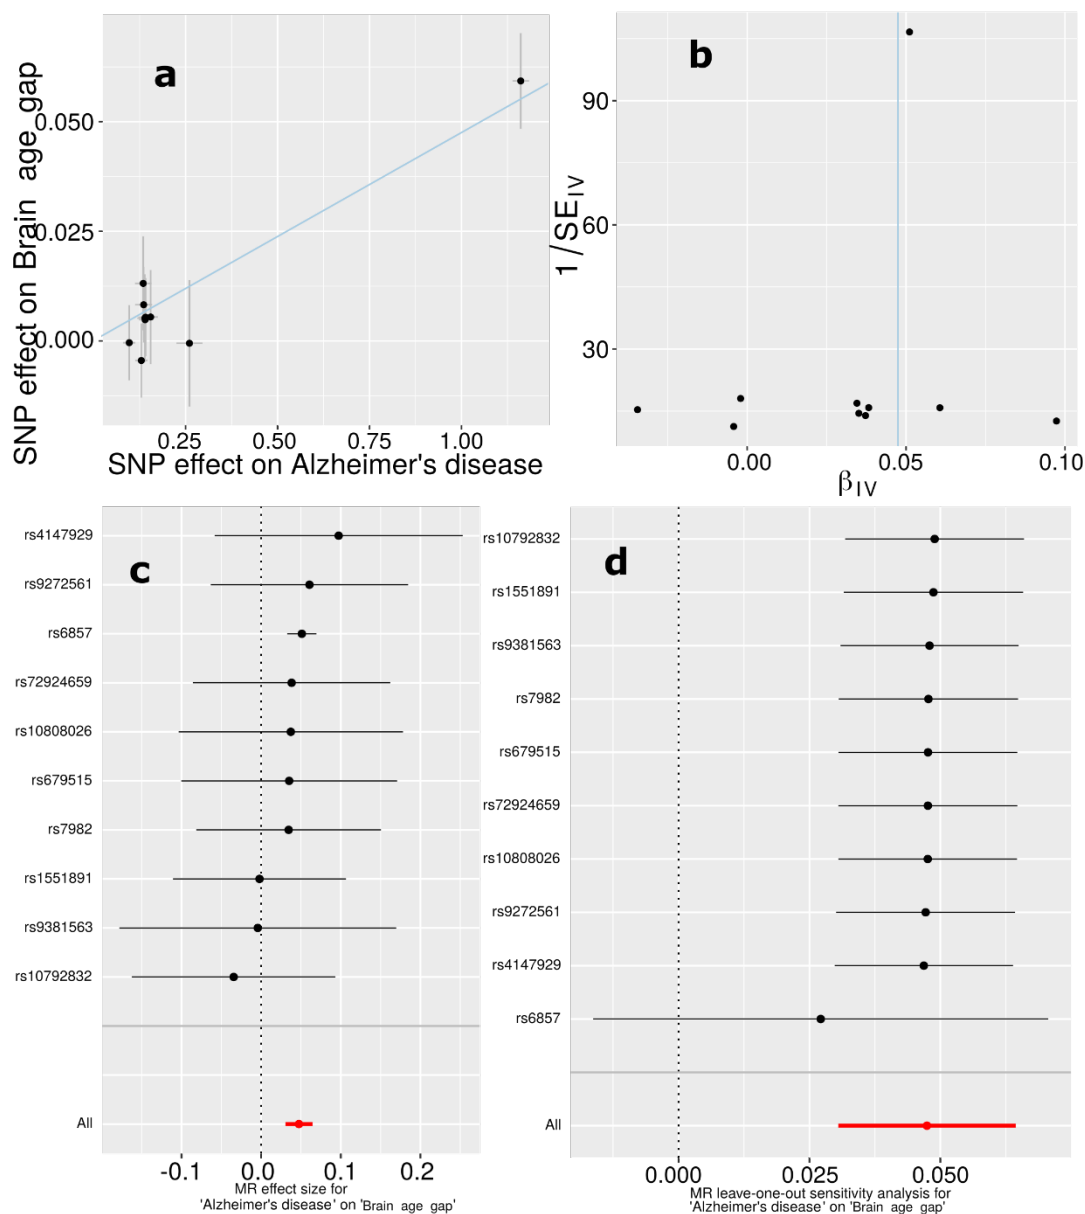

584 **a**) Scatter plot for the MR effect sizes of the exposure variable (AD,  $x$ -axis, SD units) and the  
 585 outcome variable (brain BAG,  $y$ -axis, log OR) with standard error bars. The slopes of the  
 587 regression line correspond to the causal effect sizes estimated by the IVW estimator. **b**) Funnel  
 588 plot for the relationship between the causal effect of the exposure variable on the outcome  
 589 variable. Each dot represents MR effect sizes estimated using each SNP as a separate instrument  
 590 against the inverse of the standard error of the causal estimate. The vertical red line shows the  
 591 MR estimates using all SNPs. **c**) Forest plot for the single-SNP MR results. Each line represents  
 592 the MR effect (log OR) for the exposure variable on the outcome variable using only one SNP;  
 593 the red line shows the MR effect using all SNPs together. **d**) Leave-one-out analysis of the  
 594 exposure variable on the outcome variable. Each row represents the MR effect (log OR) and the  
 595 95% CI by excluding that SNP from the analysis. The red line depicts the IVW estimator using

596 all SNPs. The sample size of the BAGs is indicated in the GWAS summary statistics publicly  
597 shared on the MEDICINE portal. The measure of the center for the error bars represents the  
598 inferred statistics.

599 **Supplementary Figure 18: Mendelian randomization sensitivity check for AD on the**  
 600 **hepatic BAG**

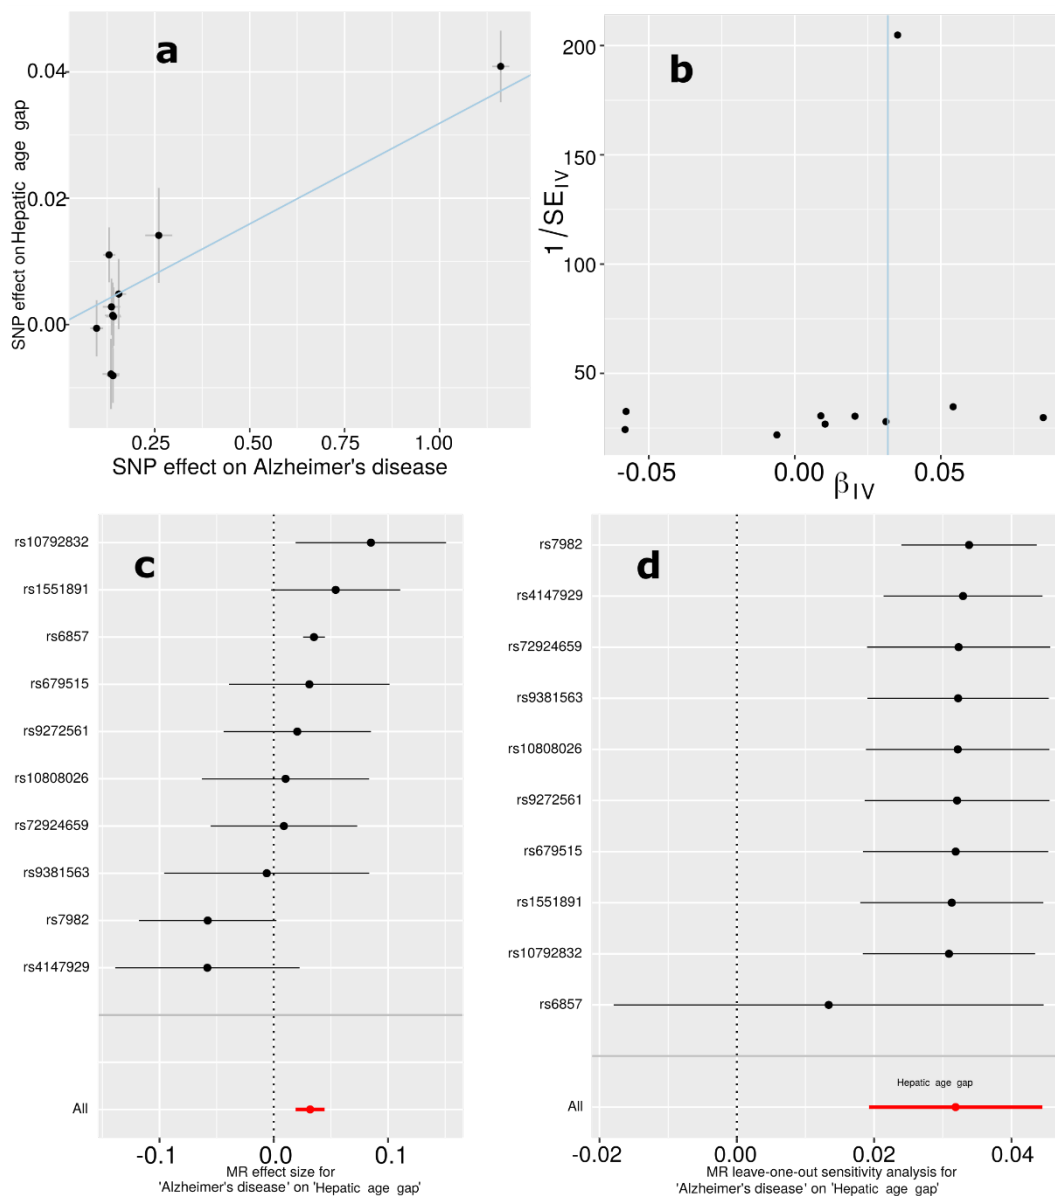

601 **a)** Scatter plot for the MR effect sizes of the exposure variable (AD,  $x$ -axis, SD units) and the  
 602 outcome variable (hepatic BAG,  $y$ -axis, log OR) with standard error bars. The slopes of the  
 603 regression line correspond to the causal effect sizes estimated by the IVW estimator. **b)** Funnel  
 604 plot for the relationship between the causal effect of the exposure variable on the outcome  
 605 variable. Each dot represents MR effect sizes estimated using each SNP as a separate instrument  
 606 against the inverse of the standard error of the causal estimate. The vertical red line shows the  
 607 MR estimates using all SNPs. **c)** Forest plot for the single-SNP MR results. Each line represents  
 608 the MR effect (log OR) for the exposure variable on the outcome variable using only one SNP;  
 609 the red line shows the MR effect using all SNPs together. **d)** Leave-one-out analysis of the  
 610 exposure variable on the outcome variable. Each row represents the MR effect (log OR) and the  
 611 95% CI by excluding that SNP from the analysis. The red line depicts the IVW estimator using  
 612

613 all SNPs. The sample size of the BAGs is indicated in the GWAS summary statistics publicly  
614 shared on the MEDICINE portal. The measure of the center for the error bars represents the  
615 inferred statistics.  
616

617 **Supplementary Figure 19: Mendelian randomization sensitivity check for Crohn's disease**  
 618 **on the hepatic BAG**

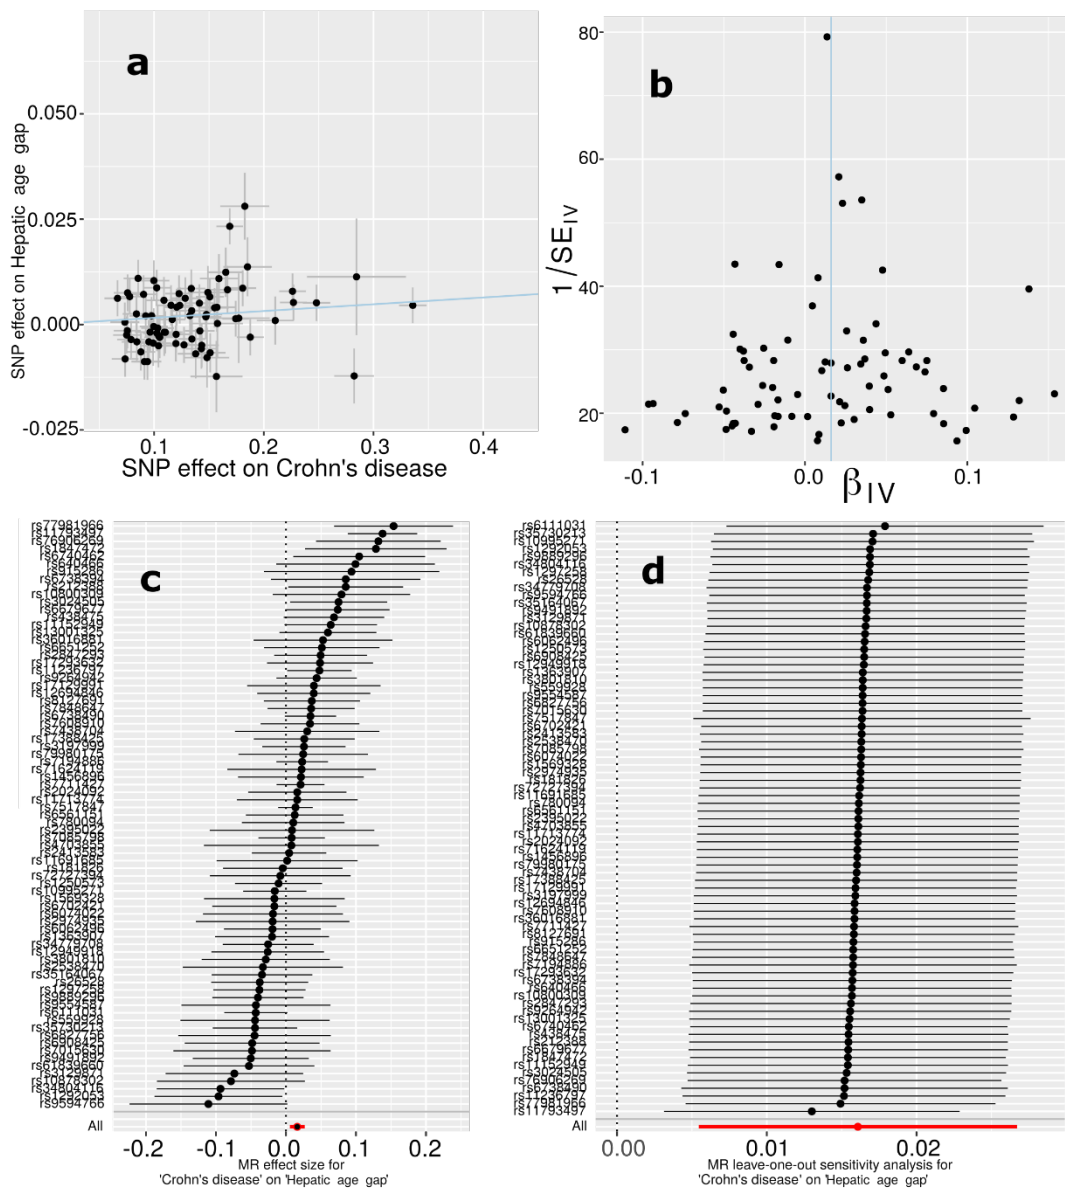

619  
 620 **a)** Scatter plot for the MR effect sizes of the exposure variable (Crohn's disease, x-axis, SD units)  
 621 and the outcome variable (hepatic BAG, y-axis, log OR) with standard error bars. The slopes of  
 622 the regression line correspond to the causal effect sizes estimated by the IVW estimator. **b)**  
 623 Funnel plot for the relationship between the causal effect of the exposure variable on the  
 624 outcome variable. Each dot represents MR effect sizes estimated using each SNP as a separate  
 625 instrument against the inverse of the standard error of the causal estimate. The vertical red line  
 626 shows the MR estimates using all SNPs. **c)** Forest plot for the single-SNP MR results. Each line  
 627 represents the MR effect (log OR) for the exposure variable on the outcome variable using only  
 628 one SNP; the red line shows the MR effect using all SNPs together. **d)** Leave-one-out analysis of  
 629 the exposure variable on the outcome variable. Each row represents the MR effect (log OR) and  
 630 the 95% CI by excluding that SNP from the analysis. The red line depicts the IVW estimator

631 using all SNPs. The sample size of the BAGs is indicated in the GWAS summary statistics  
632 publicly shared on the MEDICINE portal. The measure of the center for the error bars represents  
633 the inferred statistics.  
634



635 **Supplementary Figure 20: Mendelian randomization sensitivity check for body weight on**  
 636 **the immune BAG**

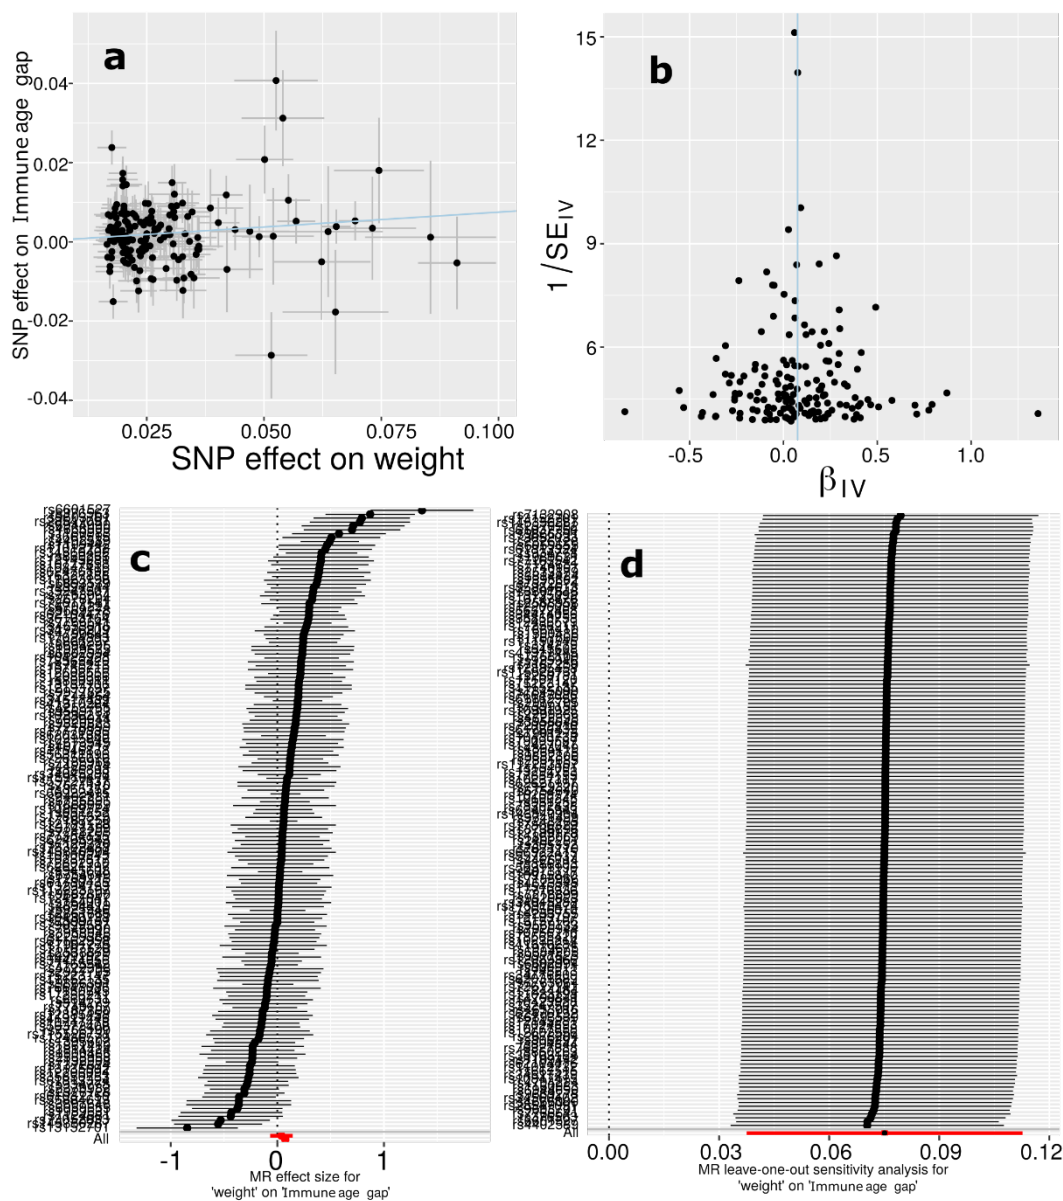

637  
 638 **a)** Scatter plot for the MR effect sizes of the exposure variable (body weight,  $x$ -axis, SD units)  
 639 and the outcome variable (immune BAG,  $y$ -axis, log OR) with standard error bars. The slopes of  
 640 the regression line correspond to the causal effect sizes estimated by the IVW estimator. **b)**  
 641 Funnel plot for the relationship between the causal effect of the exposure variable on the  
 642 outcome variable. Each dot represents MR effect sizes estimated using each SNP as a separate  
 643 instrument against the inverse of the standard error of the causal estimate. The vertical red line  
 644 shows the MR estimates using all SNPs. **c)** Forest plot for the single-SNP MR results. Each line  
 645 represents the MR effect (log OR) for the exposure variable on the outcome variable using only  
 646 one SNP; the red line shows the MR effect using all SNPs together. **d)** Leave-one-out analysis of  
 647 the exposure variable on the outcome variable. Each row represents the MR effect (log OR) and  
 648 the 95% CI by excluding that SNP from the analysis. The red line depicts the IVW estimator

649 using all SNPs. The sample size of the BAGs is indicated in the GWAS summary statistics  
650 publicly shared on the MEDICINE portal. The measure of the center for the error bars represents  
651 the inferred statistics.  
652

653 **Supplementary Figure 21: Mendelian randomization sensitivity check for type 2 diabetes**  
 654 **on the metabolic BAG**

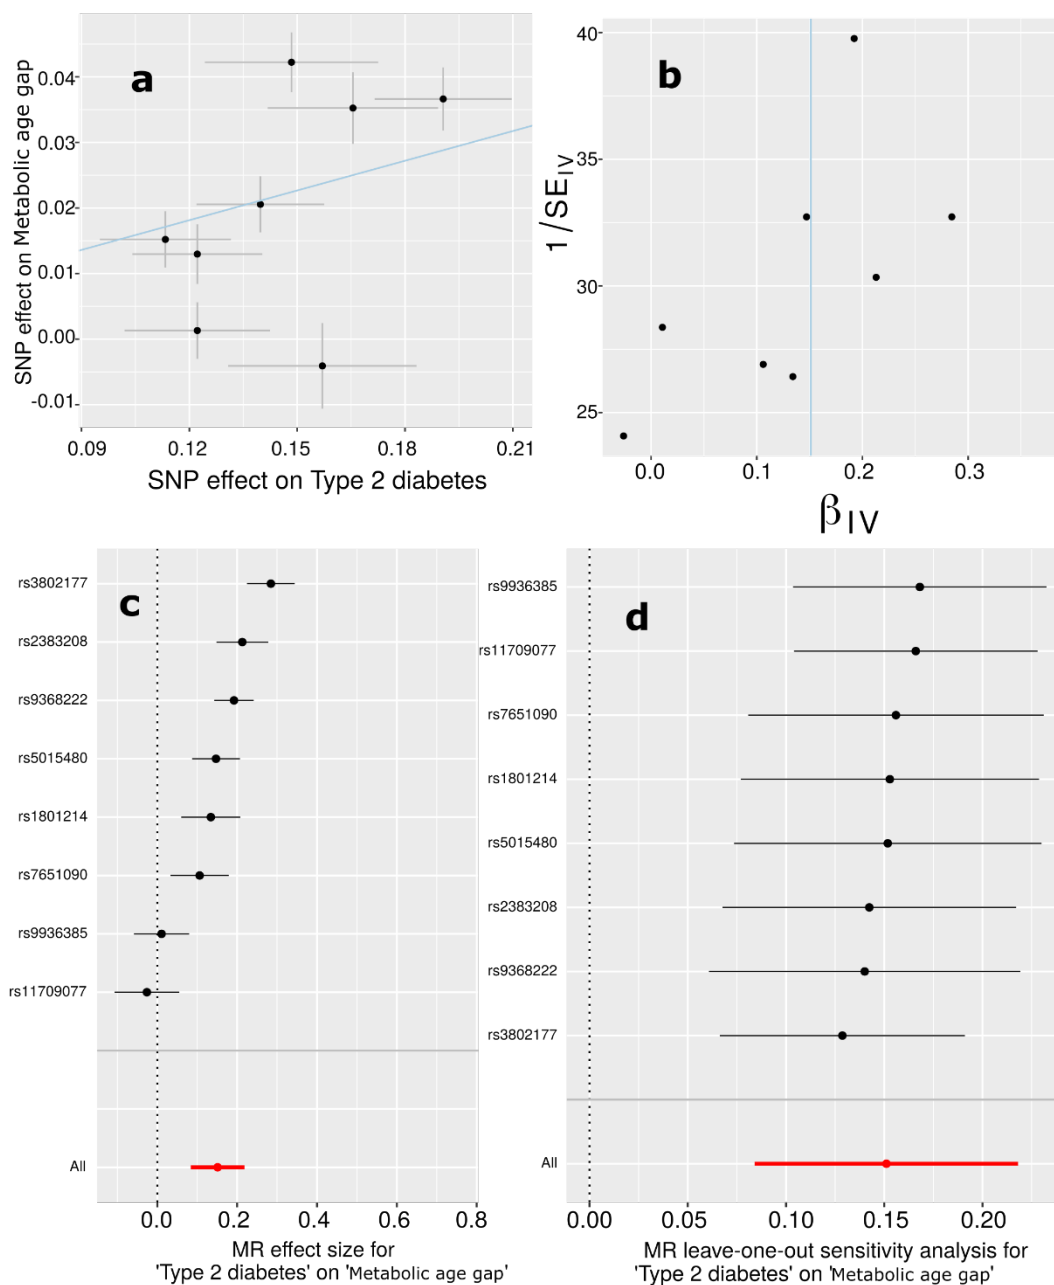

655 **a)** Scatter plot for the MR effect sizes of the exposure variable (type 2 diabetes,  $x$ -axis, SD units)  
 656 and the outcome variable (metabolic BAG,  $y$ -axis, log OR) with standard error bars. The slopes  
 657 of the regression line correspond to the causal effect sizes estimated by the IVW estimator. **b)**  
 658 Funnel plot for the relationship between the causal effect of the exposure variable on the  
 659 outcome variable. Each dot represents MR effect sizes estimated using each SNP as a separate  
 660 instrument against the inverse of the standard error of the causal estimate. The vertical red line  
 661 shows the MR estimates using all SNPs. **c)** Forest plot for the single-SNP MR results. Each line  
 662 represents the MR effect (log OR) for the exposure variable on the outcome variable using only  
 663

664 one SNP; the red line shows the MR effect using all SNPs together. **d)** Leave-one-out analysis of  
665 the exposure variable on the outcome variable. Each row represents the MR effect (log OR) and  
666 the 95% CI by excluding that SNP from the analysis. The red line depicts the IVW estimator  
667 using all SNPs. The sample size of the BAGs is indicated in the GWAS summary statistics  
668 publicly shared on the MEDICINE portal. The measure of the center for the error bars represents  
669 the inferred statistics.  
670

671 **Supplementary Figure 22: Mendelian randomization sensitivity check for AD on the**  
 672 **musculoskeletal BAG**

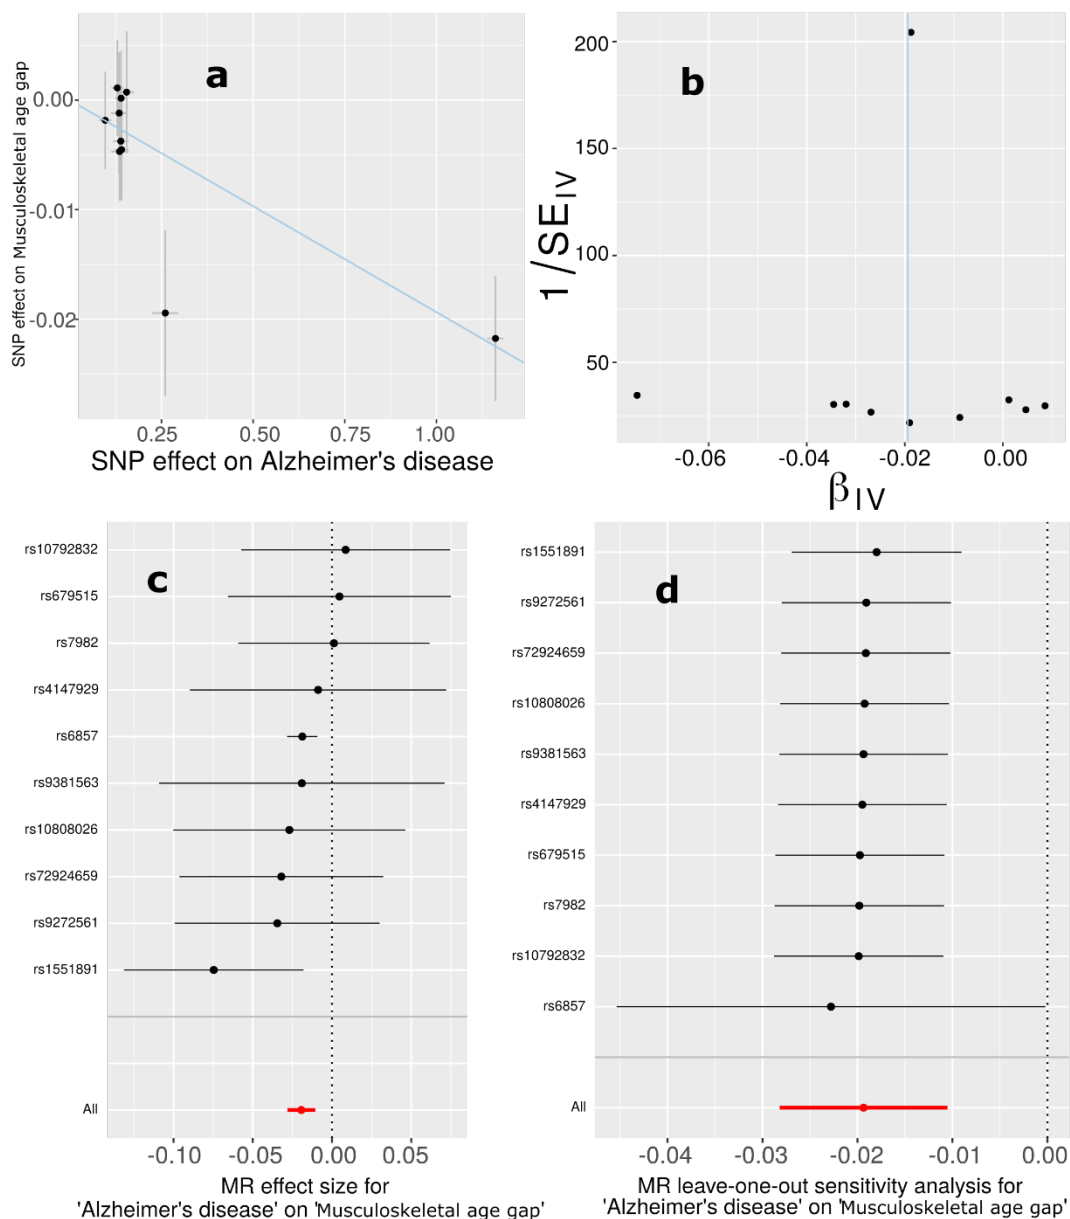

673  
 674 **a)** Scatter plot for the MR effect sizes of the exposure variable (AD,  $x$ -axis, SD units) and the  
 675 outcome variable (musculoskeletal BAG,  $y$ -axis, log OR) with standard error bars. The slopes of  
 676 the regression line correspond to the causal effect sizes estimated by the IVW estimator. **b)**  
 677 Funnel plot for the relationship between the causal effect of the exposure variable on the  
 678 outcome variable. Each dot represents MR effect sizes estimated using each SNP as a separate  
 679 instrument against the inverse of the standard error of the causal estimate. The vertical red line  
 680 shows the MR estimates using all SNPs. **c)** Forest plot for the single-SNP MR results. Each line  
 681 represents the MR effect (log OR) for the exposure variable on the outcome variable using only  
 682 one SNP; the red line shows the MR effect using all SNPs together. **d)** Leave-one-out analysis of  
 683 the exposure variable on the outcome variable. Each row represents the MR effect (log OR) and

684 the 95% CI by excluding that SNP from the analysis. The red line depicts the IVW estimator  
685 using all SNPs. The sample size of the BAGs is indicated in the GWAS summary statistics  
686 publicly shared on the MEDICINE portal. The measure of the center for the error bars represents  
687 the inferred statistics.

688 **Supplementary Figure 23: Mendelian randomization sensitivity check for IBD on the**  
 689 **musculoskeletal BAG**

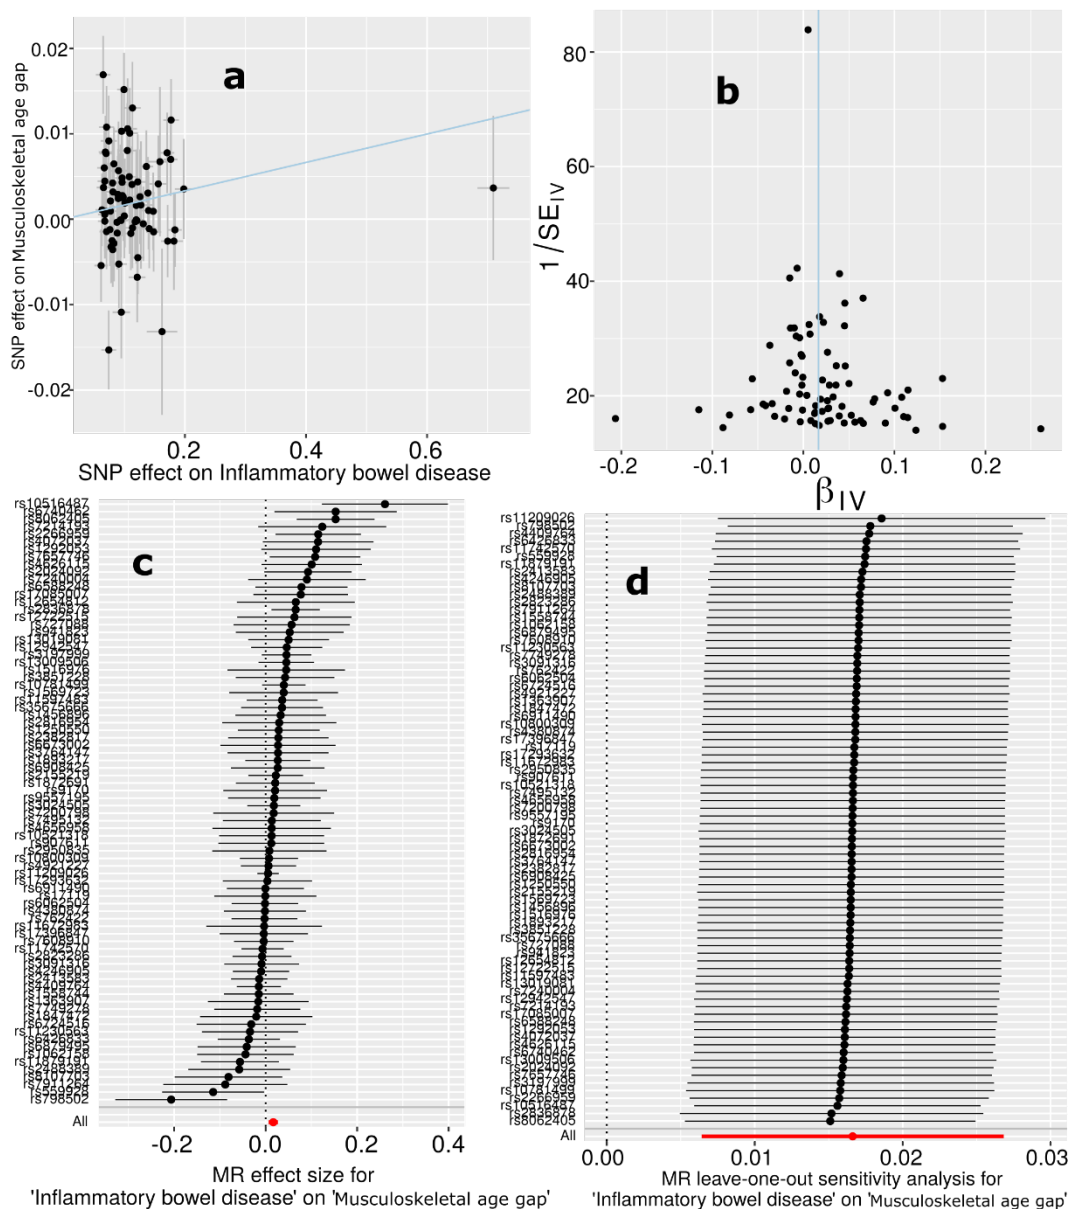

690  
 691 **a)** Scatter plot for the MR effect sizes of the exposure variable (IBD, x-axis, SD units) and the  
 692 outcome variable (musculoskeletal BAG, y-axis, log OR) with standard error bars. The slopes of  
 693 the regression line correspond to the causal effect sizes estimated by the IVW estimator. **b)**  
 694 Funnel plot for the relationship between the causal effect of the exposure variable on the  
 695 outcome variable. Each dot represents MR effect sizes estimated using each SNP as a separate  
 696 instrument against the inverse of the standard error of the causal estimate. The vertical red line  
 697 shows the MR estimates using all SNPs. **c)** Forest plot for the single-SNP MR results. Each line  
 698 represents the MR effect (log OR) for the exposure variable on the outcome variable using only  
 699 one SNP; the red line shows the MR effect using all SNPs together. **d)** Leave-one-out analysis of  
 700 the exposure variable on the outcome variable. Each row represents the MR effect (log OR) and

701 the 95% CI by excluding that SNP from the analysis. The red line depicts the IVW estimator  
702 using all SNPs. The sample size of the BAGs is indicated in the GWAS summary statistics  
703 publicly shared on the MEDICINE portal. The measure of the center for the error bars represents  
704 the inferred statistics.  
705



706 **Supplementary Figure 24: Mendelian randomization sensitivity check for PBC on the**  
 707 **musculoskeletal BAG**

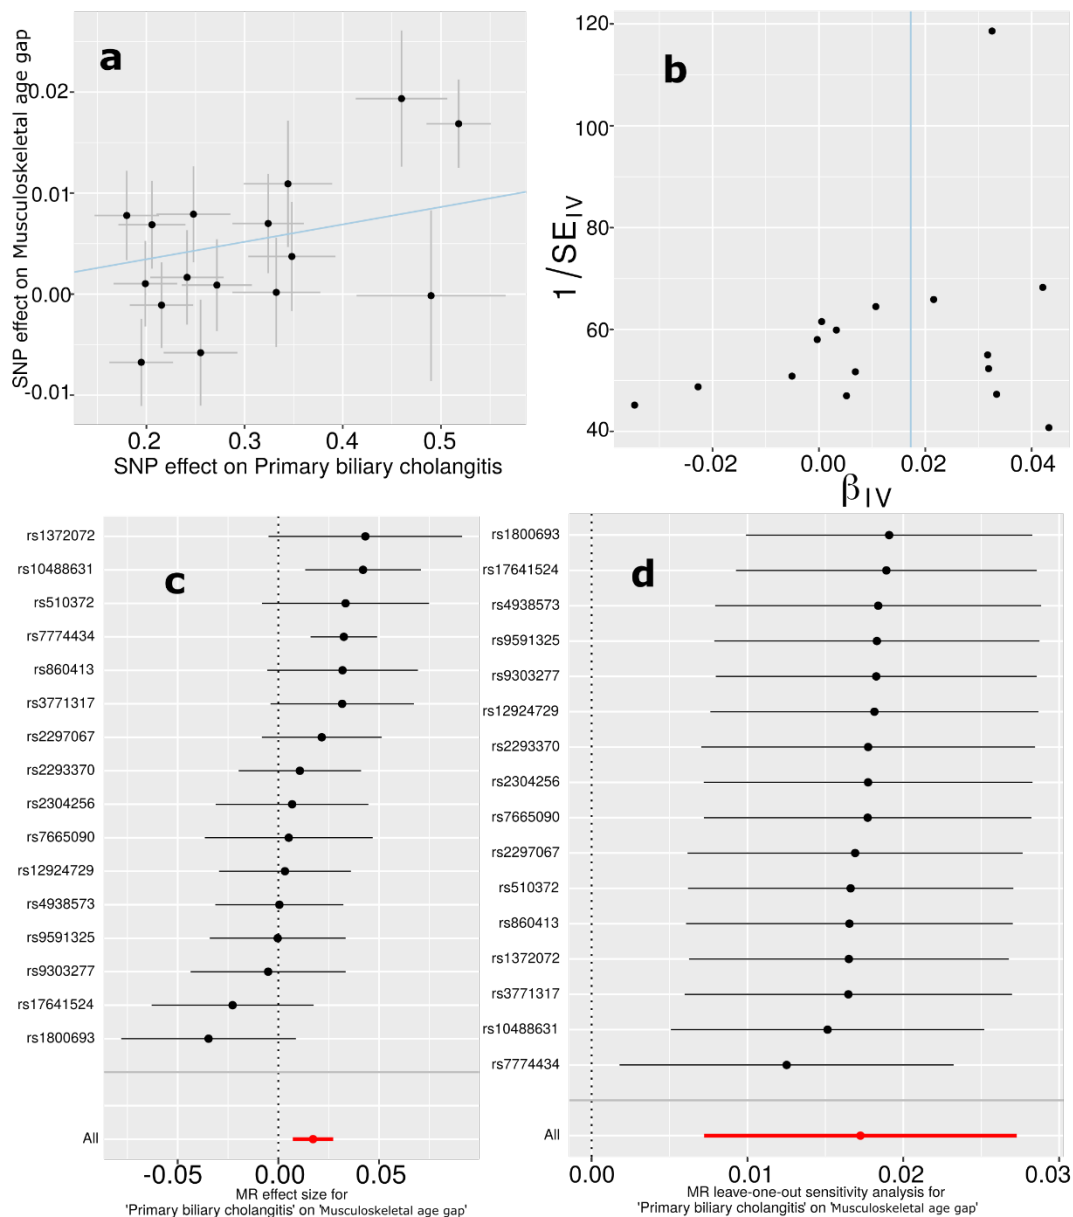

708 **a)** Scatter plot for the MR effect sizes of the exposure variable (PBC,  $x$ -axis, SD units) and the  
 709 outcome variable (musculoskeletal BAG,  $y$ -axis, log OR) with standard error bars. The slopes of  
 710 the regression line correspond to the causal effect sizes estimated by the IVW estimator. **b)**  
 711 Funnel plot for the relationship between the causal effect of the exposure variable on the  
 712 outcome variable. Each dot represents MR effect sizes estimated using each SNP as a separate  
 713 instrument against the inverse of the standard error of the causal estimate. The vertical red line  
 714 shows the MR estimates using all SNPs. **c)** Forest plot for the single-SNP MR results. Each line  
 715 represents the MR effect (log OR) for the exposure variable on the outcome variable using only  
 716 one SNP; the red line shows the MR effect using all SNPs together. **d)** Leave-one-out analysis of  
 717 the exposure variable on the outcome variable. Each row represents the MR effect (log OR) and  
 718

719 the 95% CI by excluding that SNP from the analysis. The red line depicts the IVW estimator  
720 using all SNPs. The sample size of the BAGs is indicated in the GWAS summary statistics  
721 publicly shared on the MEDICINE portal. The measure of the center for the error bars represents  
722 the inferred statistics.  
723

724 **Supplementary Figure 25: Mendelian randomization sensitivity check for weight on the**  
 725 **musculoskeletal BAG**

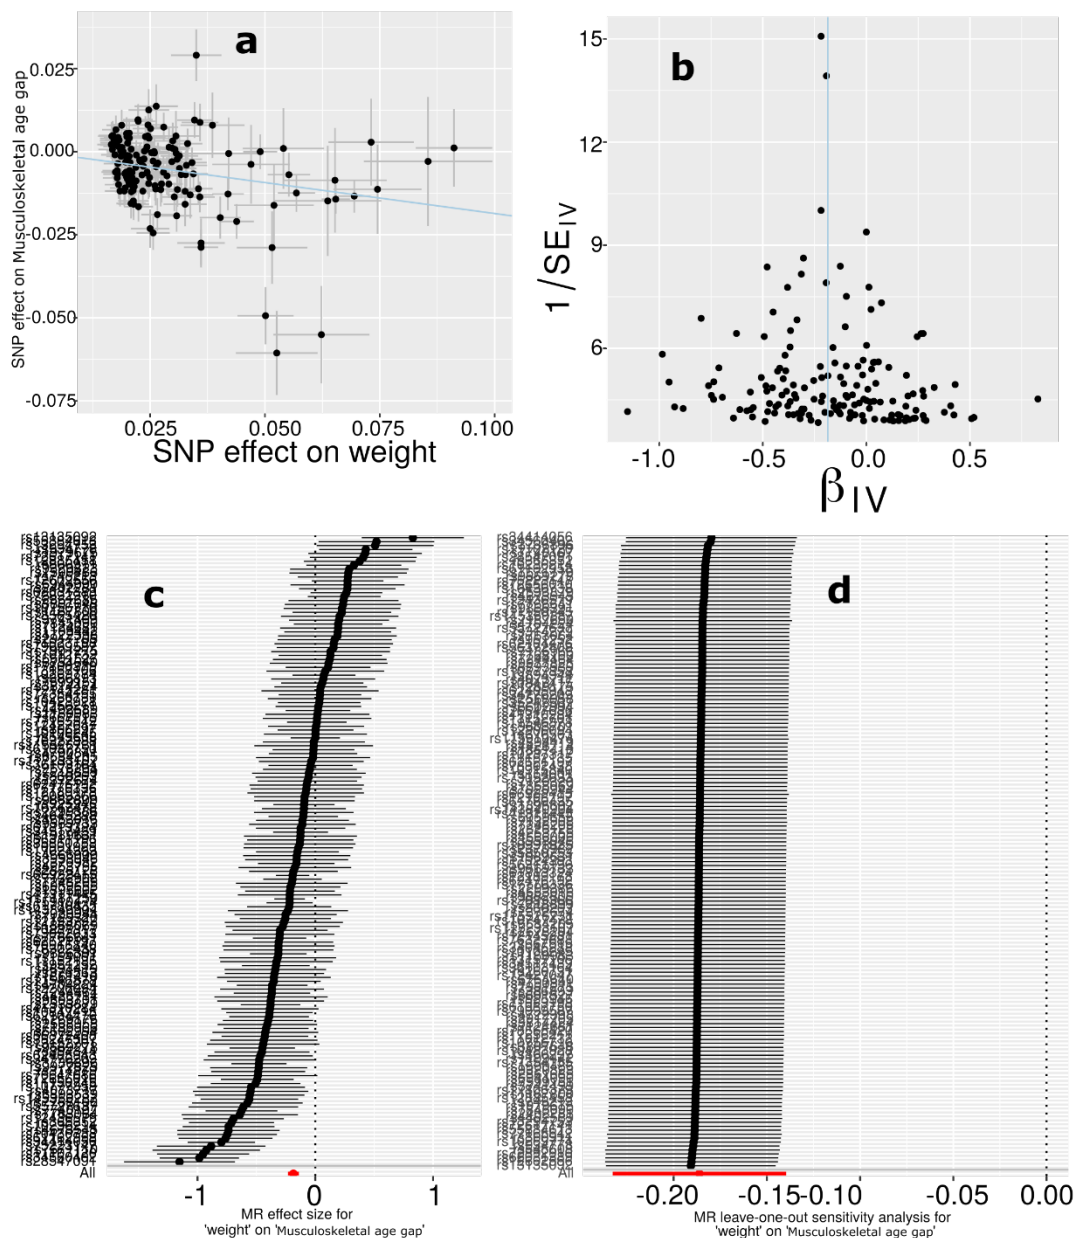

726  
 727 **a)** Scatter plot for the MR effect sizes of the exposure variable (body weight,  $x$ -axis, SD units)  
 728 and the outcome variable (musculoskeletal BAG,  $y$ -axis, log OR) with standard error bars. The  
 729 slopes of the regression line correspond to the causal effect sizes estimated by the IVW  
 730 estimator. **b)** Funnel plot for the relationship between the causal effect of the exposure variable  
 731 on the outcome variable. Each dot represents MR effect sizes estimated using each SNP as a  
 732 separate instrument against the inverse of the standard error of the causal estimate. The vertical  
 733 red line shows the MR estimates using all SNPs. **c)** Forest plot for the single-SNP MR results.  
 734 Each line represents the MR effect (log OR) for the exposure variable on the outcome variable  
 735 using only one SNP; the red line shows the MR effect using all SNPs together. **d)** Leave-one-out  
 736 analysis of the exposure variable on the outcome variable. Each row represents the MR effect

737 (log OR) and the 95% CI by excluding that SNP from the analysis. The red line depicts the IVW  
738 estimator using all SNPs. The sample size of the BAGs is indicated in the GWAS summary  
739 statistics publicly shared on the MEDICINE portal. The measure of the center for the error bars  
740 represents the inferred statistics.  
741

742 **Supplementary Figure 26: Mendelian randomization sensitivity check for weight on the**  
 743 **pulmonary BAG**

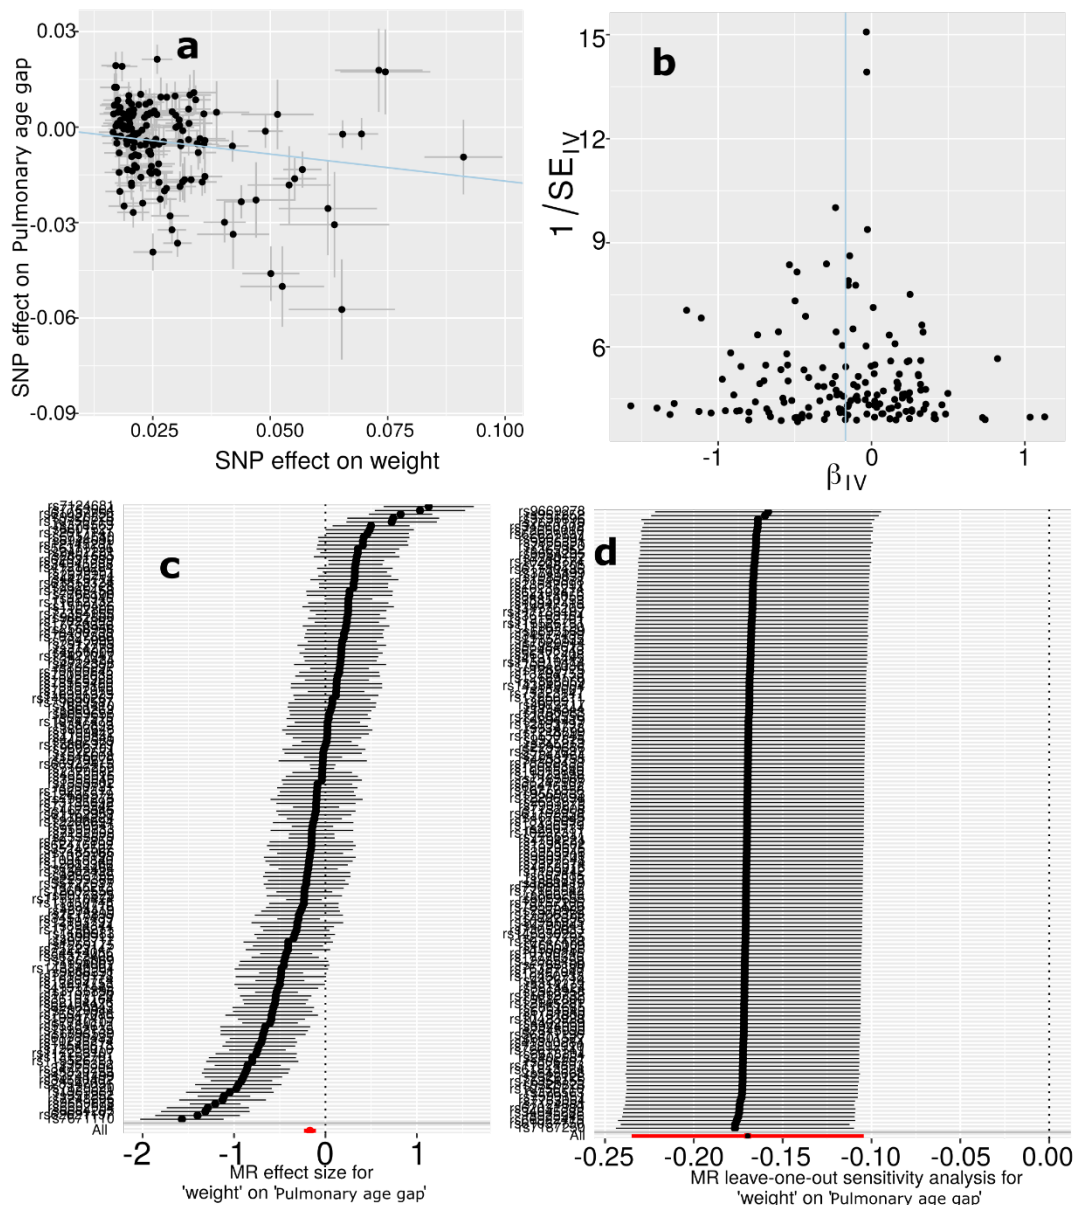

744 **a)** Scatter plot for the MR effect sizes of the exposure variable (body weight,  $x$ -axis, SD units)  
 745 and the outcome variable (pulmonary BAG,  $y$ -axis, log OR) with standard error bars. The slopes  
 746 of the regression line correspond to the causal effect sizes estimated by the IVW estimator. **b)**  
 747 Funnel plot for the relationship between the causal effect of the exposure variable on the  
 748 outcome variable. Each dot represents MR effect sizes estimated using each SNP as a separate  
 749 instrument against the inverse of the standard error of the causal estimate. The vertical red line  
 750 shows the MR estimates using all SNPs. **c)** Forest plot for the single-SNP MR results. Each line  
 751 represents the MR effect (log OR) for the exposure variable on the outcome variable using only  
 752 one SNP; the red line shows the MR effect using all SNPs together. **d)** Leave-one-out analysis of  
 753 the exposure variable on the outcome variable. Each row represents the MR effect (log OR) and  
 754

755 the 95% CI by excluding that SNP from the analysis. The red line depicts the IVW estimator  
756 using all SNPs. The sample size of the BAGs is indicated in the GWAS summary statistics  
757 publicly shared on the MEDICINE portal. The measure of the center for the error bars represents  
758 the inferred statistics.

759 **Supplementary Figure 27: Mendelian randomization sensitivity check for AD on the renal**  
 760 **BAG**

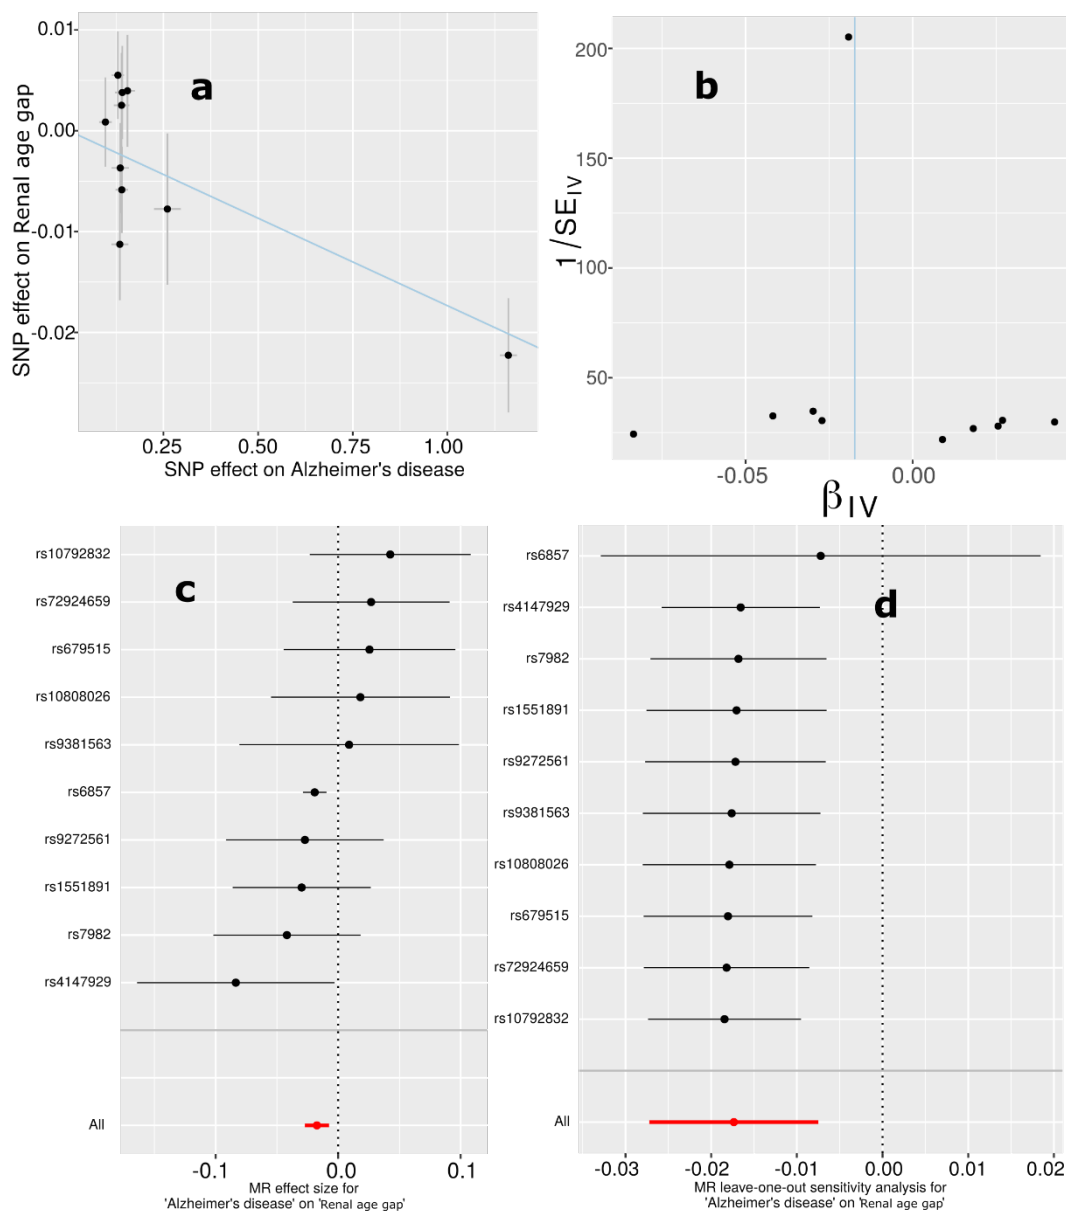

761 **a)** Scatter plot for the MR effect sizes of the exposure variable (AD,  $x$ -axis, SD units) and the  
 762 outcome variable (renal BAG,  $y$ -axis, log OR) with standard error bars. The slopes of the  
 763 regression line correspond to the causal effect sizes estimated by the IVW estimator. **b)** Funnel  
 764 plot for the relationship between the causal effect of the exposure variable on the outcome  
 765 variable. Each dot represents MR effect sizes estimated using each SNP as a separate instrument  
 766 against the inverse of the standard error of the causal estimate. The vertical red line shows the  
 767 MR estimates using all SNPs. **c)** Forest plot for the single-SNP MR results. Each line represents  
 768 the MR effect (log OR) for the exposure variable on the outcome variable using only one SNP;  
 769 the red line shows the MR effect using all SNPs together. **d)** Leave-one-out analysis of the  
 770 exposure variable on the outcome variable. Each row represents the MR effect (log OR) and the  
 771

772 95% CI by excluding that SNP from the analysis. The red line depicts the IVW estimator using  
773 all SNPs. The sample size of the BAGs is indicated in the GWAS summary statistics publicly  
774 shared on the MEDICINE portal. The measure of the center for the error bars represents the  
775 inferred statistics.



776 **Supplementary Figure 28: Mendelian randomization sensitivity check for weight on the**  
 777 **renal BAG**

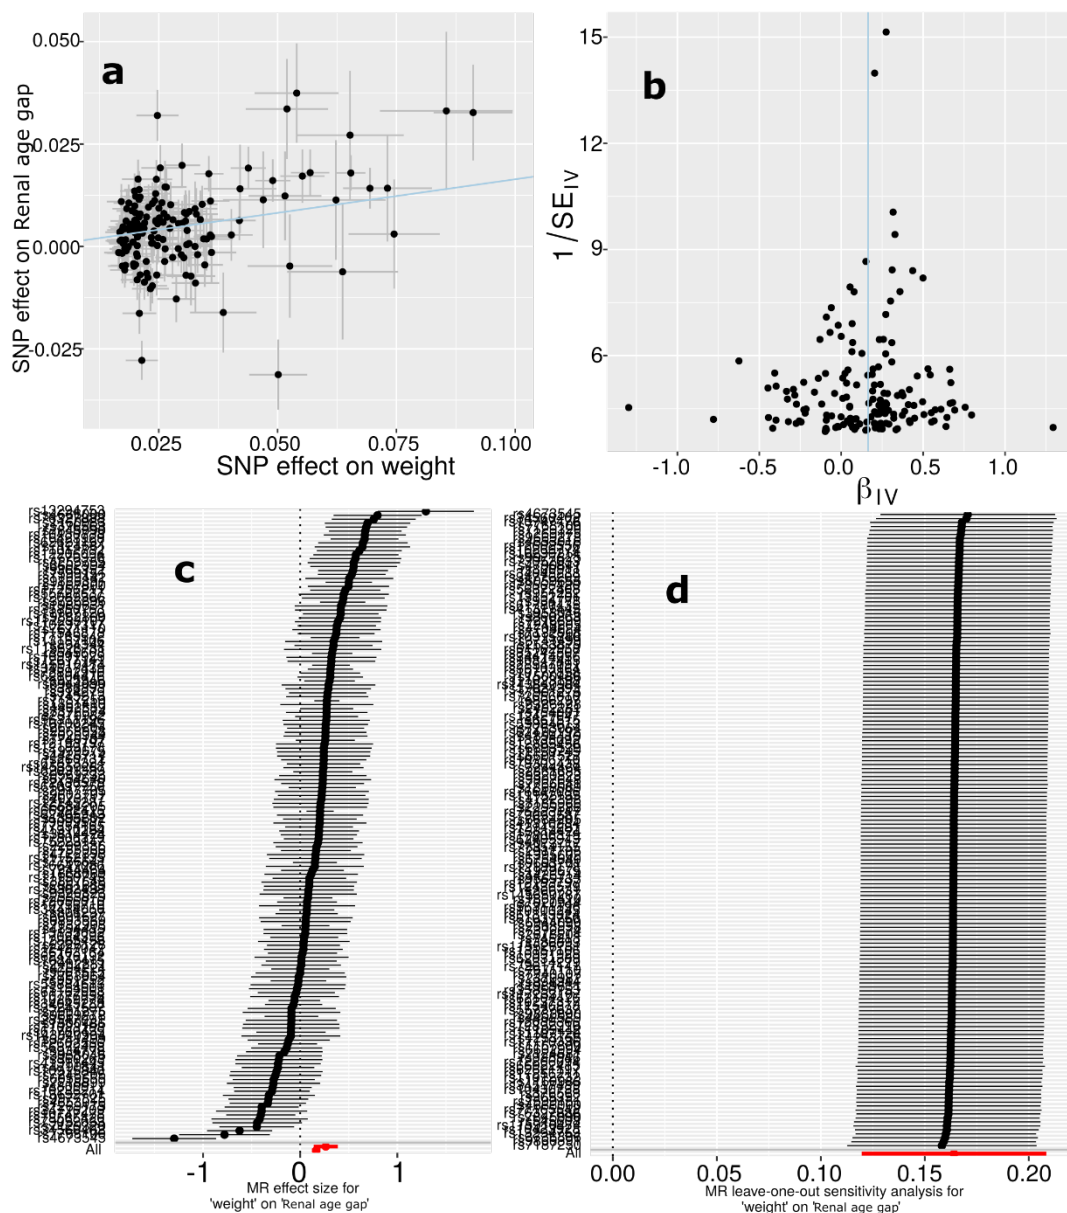

778  
 779 **a)** Scatter plot for the MR effect sizes of the exposure variable (body weight,  $x$ -axis, SD units)  
 780 and the outcome variable (renal BAG,  $y$ -axis, log OR) with standard error bars. The slopes of the  
 781 regression line correspond to the causal effect sizes estimated by the IVW estimator. **b)** Funnel  
 782 plot for the relationship between the causal effect of the exposure variable on the outcome  
 783 variable. Each dot represents MR effect sizes estimated using each SNP as a separate instrument  
 784 against the inverse of the standard error of the causal estimate. The vertical red line shows the  
 785 MR estimates using all SNPs. **c)** Forest plot for the single-SNP MR results. Each line represents  
 786 the MR effect (log OR) for the exposure variable on the outcome variable using only one SNP;  
 787 the red line shows the MR effect using all SNPs together. **d)** Leave-one-out analysis of the  
 788 exposure variable on the outcome variable. Each row represents the MR effect (log OR) and the  
 789 95% CI by excluding that SNP from the analysis. The red line depicts the IVW estimator using

790 all SNPs. The sample size of the BAGs is indicated in the GWAS summary statistics publicly  
791 shared on the MEDICINE portal. The measure of the center for the error bars represents the  
792 inferred statistics.

793 **Supplementary Figure 29: Mendelian randomization sensitivity check for the brain BAG**  
 794 **on sleep duration**

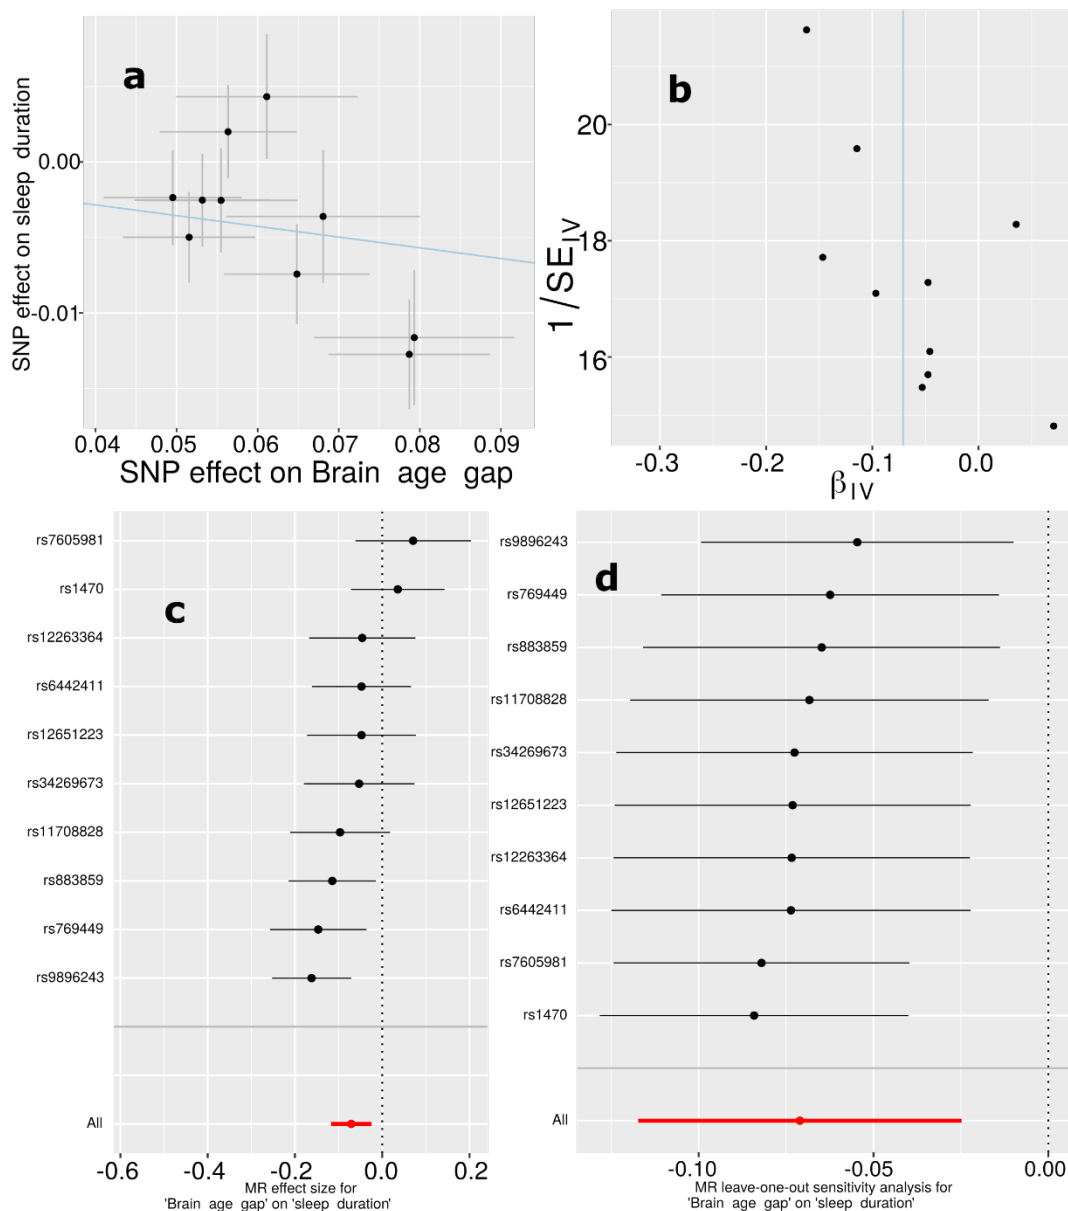

795  
 796 **a)** Scatter plot for the MR effect sizes of the exposure variable (brain BAG, x-axis, SD units) and  
 797 the outcome variable (sleep duration, y-axis, log OR) with standard error bars. The slopes of the  
 798 regression line correspond to the causal effect sizes estimated by the IVW estimator. **b)** Funnel  
 799 plot for the relationship between the causal effect of the exposure variable on the outcome  
 800 variable. Each dot represents MR effect sizes estimated using each SNP as a separate instrument  
 801 against the inverse of the standard error of the causal estimate. The vertical red line shows the  
 802 MR estimates using all SNPs. **c)** Forest plot for the single-SNP MR results. Each line represents  
 803 the MR effect (log OR) for the exposure variable on the outcome variable using only one SNP;  
 804 the red line shows the MR effect using all SNPs together. **d)** Leave-one-out analysis of the  
 805 exposure variable on the outcome variable. Each row represents the MR effect (log OR) and the

806 95% CI by excluding that SNP from the analysis. The red line depicts the IVW estimator using  
807 all SNPs. The sample size of the BAGs is indicated in the GWAS summary statistics publicly  
808 shared on the MEDICINE portal. The measure of the center for the error bars represents the  
809 inferred statistics.  
810

811 **Supplementary Figure 30: Mendelian randomization sensitivity check for the**  
 812 **cardiovascular BAG on triglycerides to lipids ratio in very large VLDL**

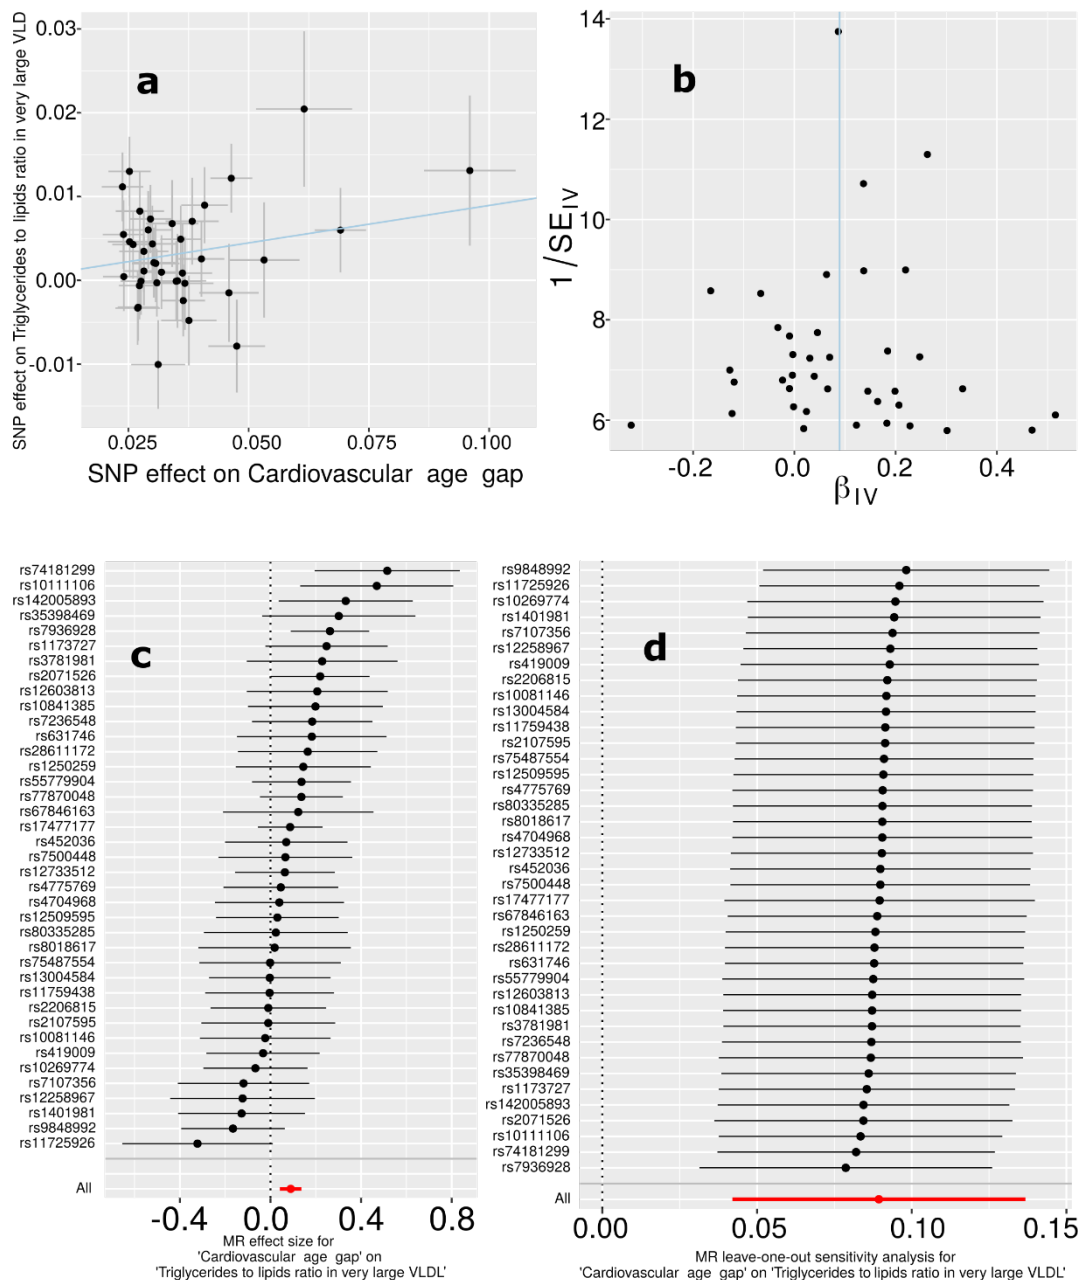

813  
 814 **a)** Scatter plot for the MR effect sizes of the exposure variable (cardiovascular BAG, x-axis, SD  
 815 units) and the outcome variable (triglycerides to lipids ratio in very large VLDL, y-axis, log OR)  
 816 with standard error bars. The slopes of the regression line correspond to the causal effect sizes  
 817 estimated by the IVW estimator. **b)** Funnel plot for the relationship between the causal effect of  
 818 the exposure variable on the outcome variable. Each dot represents MR effect sizes estimated  
 819 using each SNP as a separate instrument against the inverse of the standard error of the causal  
 820 estimate. The vertical red line shows the MR estimates using all SNPs. **c)** Forest plot for the  
 821 single-SNP MR results. Each line represents the MR effect (log OR) for the exposure variable on  
 822 the outcome variable using only one SNP; the red line shows the MR effect using all SNPs

823 together. **d)** Leave-one-out analysis of the exposure variable on the outcome variable. Each row  
824 represents the MR effect (log OR) and the 95% CI by excluding that SNP from the analysis. The  
825 red line depicts the IVW estimator using all SNPs. The sample size of the BAGs is indicated in  
826 the GWAS summary statistics publicly shared on the MEDICINE portal. The measure of the  
827 center for the error bars represents the inferred statistics.

828 **Supplementary Figure 31: Mendelian randomization sensitivity check for the metabolic**  
 829 **BAG on weight**

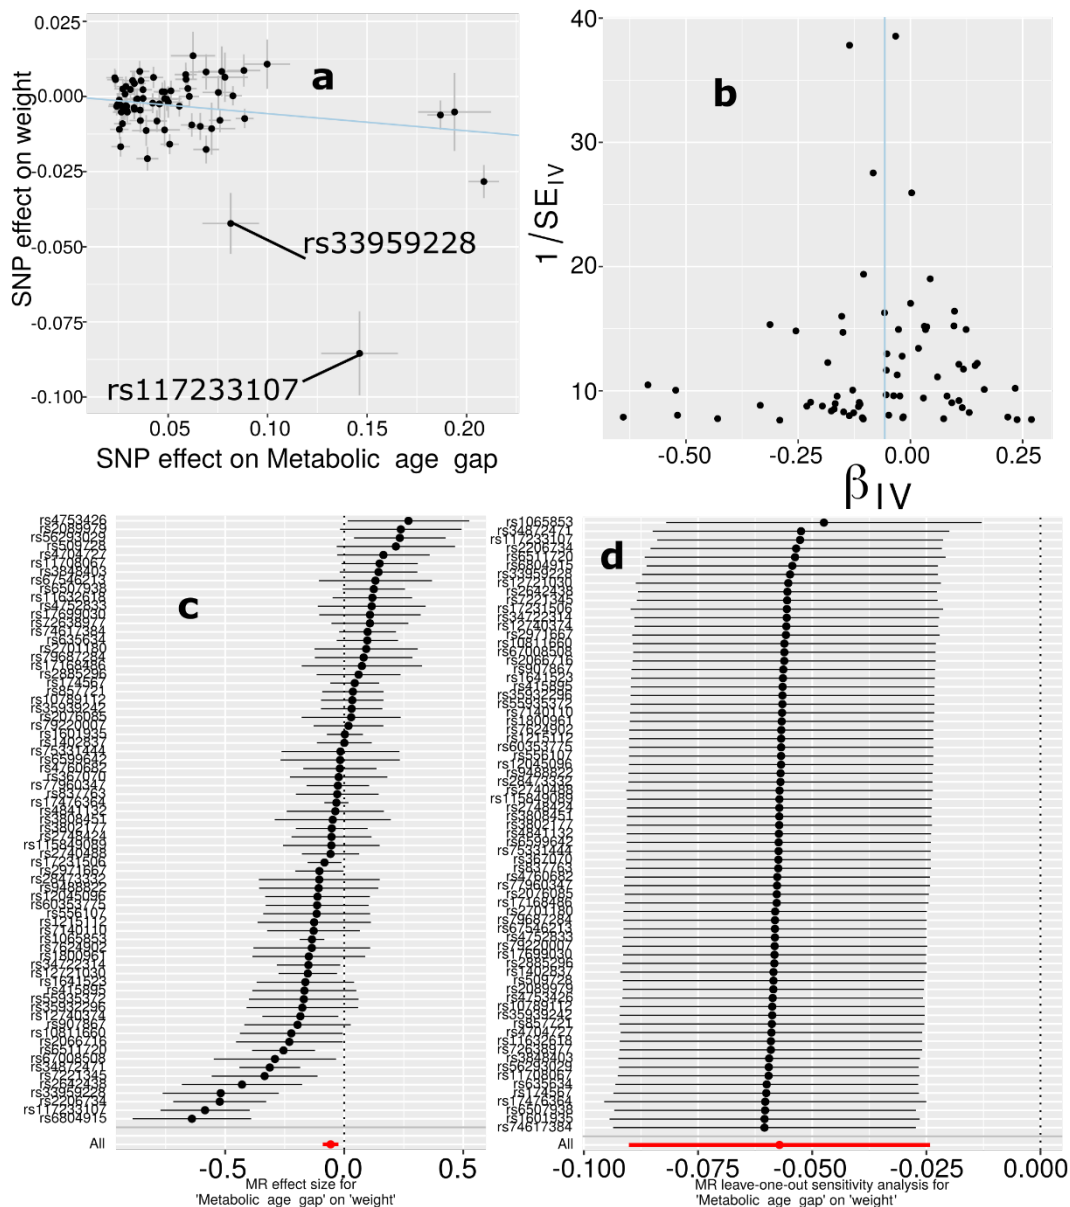

830  
 831 **a)** Scatter plot for the MR effect sizes of the exposure variable (metabolic BAG, x-axis, SD  
 832 units) and the outcome variable (body weight, y-axis, log OR) with standard error bars. The  
 833 slopes of the regression line correspond to the causal effect sizes estimated by the IVW  
 834 estimator. **b)** Funnel plot for the relationship between the causal effect of the exposure variable  
 835 on the outcome variable. Each dot represents MR effect sizes estimated using each SNP as a  
 836 separate instrument against the inverse of the standard error of the causal estimate. The vertical  
 837 red line shows the MR estimates using all SNPs. **c)** Forest plot for the single-SNP MR results.  
 838 Each line represents the MR effect (log OR) for the exposure variable on the outcome variable  
 839 using only one SNP; the red line shows the MR effect using all SNPs together. **d)** Leave-one-out  
 840 analysis of the exposure variable on the outcome variable. Each row represents the MR effect

841 (log OR) and the 95% CI by excluding that SNP from the analysis. The red line depicts the IVW  
842 estimator using all SNPs. The sample size of the BAGs is indicated in the GWAS summary  
843 statistics publicly shared on the MEDICINE portal. The measure of the center for the error bars  
844 represents the inferred statistics.  
845



846 **Supplementary Figure 32: Mendelian randomization sensitivity check for the pulmonary**  
 847 **BAG on weight**

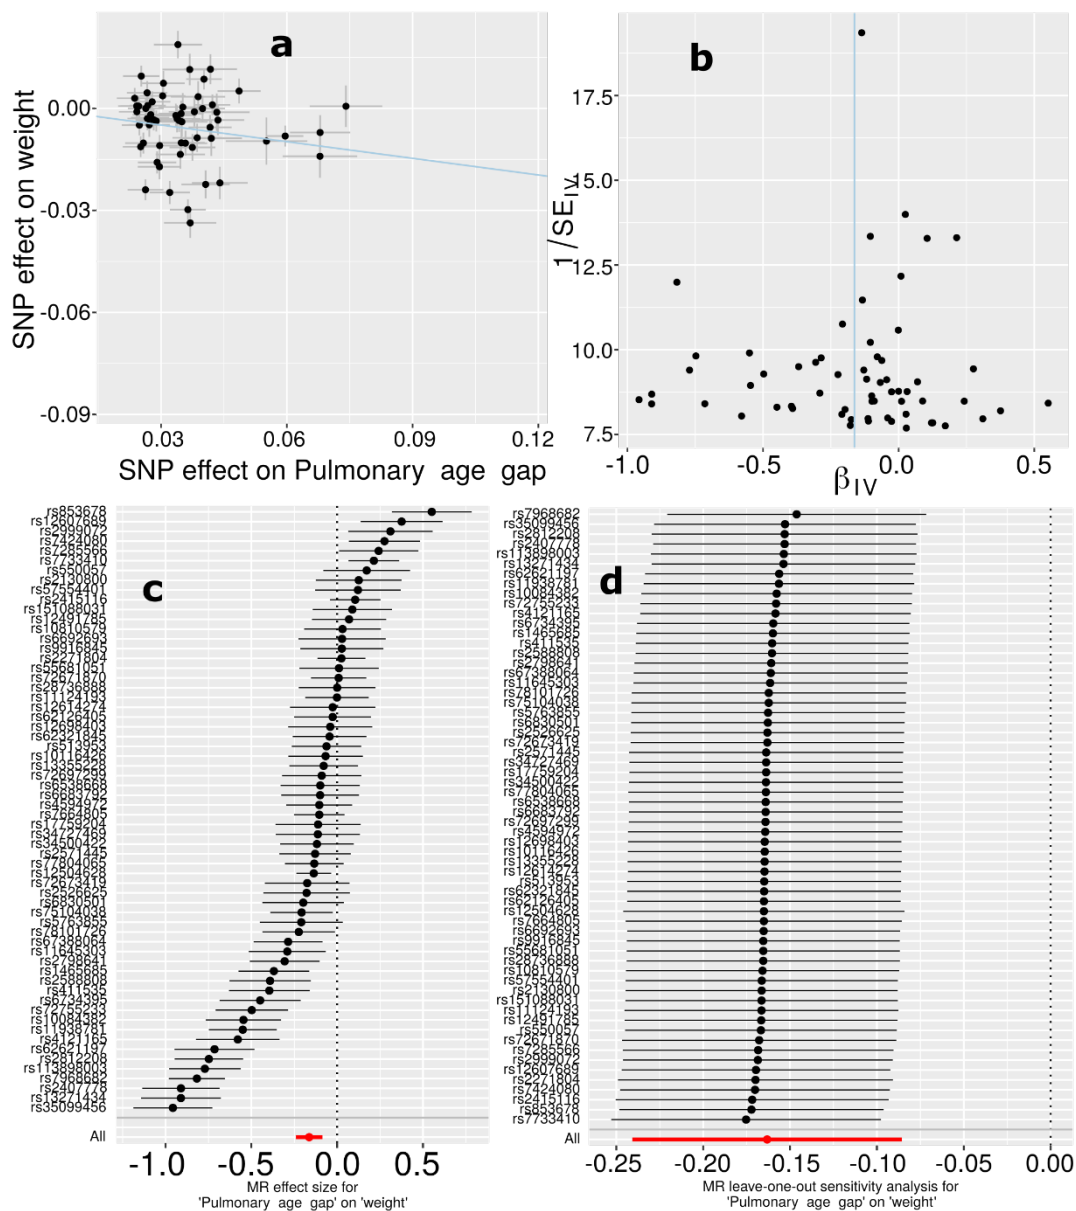

848  
 849 **a)** Scatter plot for the MR effect sizes of the exposure variable (pulmonary BAG, x-axis, SD  
 850 units) and the outcome variable (body weight, y-axis, log OR) with standard error bars. The  
 851 slopes of the regression line correspond to the causal effect sizes estimated by the IVW  
 852 estimator. **b)** Funnel plot for the relationship between the causal effect of the exposure variable  
 853 on the outcome variable. Each dot represents MR effect sizes estimated using each SNP as a  
 854 separate instrument against the inverse of the standard error of the causal estimate. The vertical  
 855 red line shows the MR estimates using all SNPs. **c)** Forest plot for the single-SNP MR results.  
 856 Each line represents the MR effect (log OR) for the exposure variable on the outcome variable  
 857 using only one SNP; the red line shows the MR effect using all SNPs together. **d)** Leave-one-out  
 858 analysis of the exposure variable on the outcome variable. Each row represents the MR effect

859 (log OR) and the 95% CI by excluding that SNP from the analysis. The red line depicts the IVW  
860 estimator using all SNPs. The sample size of the BAGs is indicated in the GWAS summary  
861 statistics publicly shared on the MEDICINE portal. The measure of the center for the error bars  
862 represents the inferred statistics.  
863

864 **Supplementary Table 1: Heritability estimates using the GCTA software**

865 The P-values obtained from the GCTA software were exceptionally small (i.e., significant) in our  
 866 analyses, even smaller than the lower bound set in the software, resulting in a precision issue and  
 867 yielding a result of 0.0000e+00. Hence, we report all P-values as  $P < 1 \times 10^{-100}$ .

868 **A) Original sample sizes.** Original sample sizes were used to estimate the heritability for  
 869 the nine organ systems.

| BAG             | $h^2$ | $h^2$ SE | P-value               | $N$     |
|-----------------|-------|----------|-----------------------|---------|
| Brain           | 0.47  | 0.02     | $<1 \times 10^{-100}$ | 30,108  |
| Cardiovascular  | 0.27  | 0.006    | $<1 \times 10^{-100}$ | 111,543 |
| Eye             | 0.38  | 0.02     | $<1 \times 10^{-100}$ | 36,004  |
| Hepatic         | 0.23  | 0.006    | $<1 \times 10^{-100}$ | 111,543 |
| Immune          | 0.20  | 0.004    | $<1 \times 10^{-100}$ | 111,543 |
| Metabolic       | 0.29  | 0.006    | $<1 \times 10^{-100}$ | 111,543 |
| Musculoskeletal | 0.24  | 0.004    | $<1 \times 10^{-100}$ | 111,543 |
| Pulmonary       | 0.36  | 0.006    | $<1 \times 10^{-100}$ | 111,543 |
| Renal           | 0.30  | 0.006    | $<1 \times 10^{-100}$ | 111,543 |

870

871 **B) Down-sampled sample sizes.** For the eight BAGs except for the brain BAG, we  
 872 randomly down-sampled the original sample sizes to that of the brain BAG.

| BAG             | $h^2$ | $h^2$ SE | P-value               | $N$    |
|-----------------|-------|----------|-----------------------|--------|
| Brain           | 0.47  | 0.02     | $<1 \times 10^{-100}$ | 30,108 |
| Cardiovascular  | 0.35  | 0.07     | $<1 \times 10^{-100}$ | 30,108 |
| Eye             | 0.42  | 0.02     | $<1 \times 10^{-100}$ | 30,108 |
| Hepatic         | 0.18  | 0.07     | $<1 \times 10^{-100}$ | 30,108 |
| Immune          | 0.19  | 0.07     | $<1 \times 10^{-100}$ | 30,108 |
| Metabolic       | 0.16  | 0.07     | $<1 \times 10^{-100}$ | 30,108 |
| Musculoskeletal | 0.21  | 0.07     | $<1 \times 10^{-100}$ | 30,108 |
| Pulmonary       | 0.39  | 0.07     | $<1 \times 10^{-100}$ | 30,108 |
| Renal           | 0.28  | 0.07     | $<1 \times 10^{-100}$ | 30,108 |

873

874 **C) Brain imaging-derived phenotypes vs. 4 pulmonary features.** For the brain imaging  
 875 phenotypes, we used four sets of features from our previous studies: *i*) 32 pattern of  
 876 structural coavairance (PSCs) from the data-driven MuSIC atlas using T1-weighted MRI  
 877 and orthogonal-projective non-negative matrix factorization<sup>18</sup>; *ii*) 101 GM ROIs using the  
 878 ANTs (<https://stnava.github.io/ANTs/>) software<sup>9</sup>; *iii*) the 21 WM tracts for fractional  
 879 anisotropy (FA) mean values<sup>8</sup>; and *iv*) 21 funtional node (FN) measures from resting-  
 880 state functional MRI<sup>7</sup>. The 4 pulmonary features included forced vital capacity, forced  
 881 expiratory volume, peak expiratory flow, and the ratio of forced expiratory volume to  
 882 forced vital capacity. For comparison purposes, we also show the  $h^2$  estimates for the  
 883 brain and pulmonary BAGs. The detailed results for all estimates are presented in  
 884 **Supplementary Source Data 22**. The distribution of each phenotype group is shown in  
 885 the figure below.

| Organ | Phenotype group | Phenotype (mean or individual) | $h^2$ | $h^2$ SE | P-value |
|-------|-----------------|--------------------------------|-------|----------|---------|
|-------|-----------------|--------------------------------|-------|----------|---------|

|           |                   |                     |      |       |                       |
|-----------|-------------------|---------------------|------|-------|-----------------------|
| Brain     | Brain feature     | MuSIC <sup>18</sup> | 0.45 | 0.16  | $<1 \times 10^{-100}$ |
|           |                   | GM-IDP <sup>9</sup> | 0.39 | 0.16  | $<1 \times 10^{-100}$ |
|           |                   | WM-IDP <sup>8</sup> | 0.53 | 0.08  | $<1 \times 10^{-100}$ |
|           |                   | FN-IDP <sup>7</sup> | 0.29 | 0.06  | $<1 \times 10^{-100}$ |
|           | Brain BAG         | Brain BAG           | 0.47 | 0.02  | $<1 \times 10^{-100}$ |
| Pulmonary | Pulmonary feature | FVC                 | 0.34 | 0.007 | $<1 \times 10^{-100}$ |
|           |                   | FEV/FVC             | 0.41 | 0.007 | $<1 \times 10^{-100}$ |
|           |                   | PEF                 | 0.28 | 0.007 | $<1 \times 10^{-100}$ |
|           |                   | FEV                 | 0.35 | 0.007 | $<1 \times 10^{-100}$ |
|           | Pulmonary BAG     | Pulmonary BAG       | 0.36 | 0.006 | $<1 \times 10^{-100}$ |

887 **Supplementary Table 2: The beta coefficient and its SE estimate from the full sample vs.**  
 888 **the down-sampled brain BAG comparable sample**

889 N\_ISS: number of independent significant SNPs

| BAG             | Mean_beta_downsample | Mean_beta_fullsample | SE_beta_downsample | SE_beta_fullsample | t_beta   | p_beta   | t_se     | p_se     | N_ISS |
|-----------------|----------------------|----------------------|--------------------|--------------------|----------|----------|----------|----------|-------|
| Cardiovascular  | 0.034802             | 0.035822             | 0.010533           | 0.005457           | -0.51317 | 0.608293 | 14.0846  | 1.95E-33 | 124   |
| Eye             | 0.06527              | 0.064561             | 0.009967           | 0.009128           | 0.136138 | 0.891913 | 1.828485 | 0.069668 | 69    |
| Hepatic         | 0.058408             | 0.057479             | 0.014495           | 0.007525           | 0.293471 | 0.769268 | 13.28265 | 2.59E-35 | 289   |
| Immune          | 0.043347             | 0.041526             | 0.011454           | 0.005948           | 0.682463 | 0.495312 | 12.78407 | 5.79E-32 | 217   |
| Metabolic       | 0.053834             | 0.052587             | 0.013227           | 0.006842           | 0.490113 | 0.624182 | 15.99737 | 1.7E-50  | 422   |
| Musculoskeletal | 0.04263              | 0.041015             | 0.011109           | 0.005817           | 0.520949 | 0.602797 | 11.23119 | 1.44E-24 | 147   |
| Pulmonary       | 0.035423             | 0.036056             | 0.010959           | 0.005678           | -0.53629 | 0.591975 | 20.08143 | 1.81E-67 | 272   |
| Renal           | 0.067828             | 0.068927             | 0.014536           | 0.007595           | -0.2335  | 0.815446 | 12.87744 | 5.18E-34 | 331   |

890

891 **Supplementary Table 3: Genetic correlation analyses between the pulmonary BAG and the**  
 892 **four features used to derive the BAG.**

893 The P-values obtained from the LDSC software were exceptionally small (i.e., significant) in our  
 894 analyses, even smaller than the lower bound set in the software, resulting in a precision issue and  
 895 yielding a result of 0.0000e+00. Hence, we report all P-values as  $P < 1 \times 10^{-300}$ .

896

| BAG               | Pulmonary feature                               | $g_c$ mean | $g_c$ std | P-value                |
|-------------------|-------------------------------------------------|------------|-----------|------------------------|
| Pulmonary_age_gap | forced_vital_capacity_fvc_zscore                | 0.6409     | 0.0195    | $6.1 \times 10^{-237}$ |
|                   | fev1_fvc_ratio_zscore                           | 0.5371     | 0.0316    | $6.47 \times 10^{-65}$ |
|                   | peak_expiratory_flow_pef                        | -0.7903    | 0.0175    | $< 1 \times 10^{-300}$ |
|                   | forced_expiratory_volume_in_1second_fev1_zscore | 0.8259     | 0.0111    | $< 1 \times 10^{-300}$ |

897

898 **Supplementary Table 4: Selected 41 clinical traits for genetic correlation analyses.** We  
 899 selected the candidate studies from the GWAS Catalog for 41 clinical traits, including chronic  
 900 diseases affecting multiple organ systems, education, and intelligence. To ensure the suitability of  
 901 the GWAS summary statistics, we first checked that the selected study's population was European  
 902 ancestry; we then guaranteed a moderate SNP-based heritability  $h^2$  estimate and excluded the  
 903 studies with spurious low  $h^2$  ( $<0.05$ ). Abbreviations are detailed in the main text.  
 904

| Primary organ system | Trait          | PubMed ID | Sample size |
|----------------------|----------------|-----------|-------------|
| Brain                | AD             | 30820047  | 63,926      |
|                      | Smile-GAN-AD1  | NA        | 33,540      |
|                      | SmileGAN-AD2   | NA        | 33,540      |
|                      | SmileGAN-AD3   | NA        | 33,540      |
|                      | SmileGAN-AD4   | NA        | 33,540      |
|                      | SurrealGAN-AD1 | NA        | 33,540      |
|                      | SurrealGAN-AD2 | NA        | 33,540      |
|                      | ADHD           | 30478444  | 53,293      |
|                      | ALS            | 27455348  | 36052       |
|                      | ASD            | 30804558  | 46,350      |
|                      | HYDRA-ASD1     | 37017948  | 14,786      |
|                      | HYDRA-ASD2     | 37017948  | 14,786      |
|                      | HYDRA-ASD3     | 37017948  | 14,786      |
|                      | BIP            | 31043756  | 51,710      |
|                      | MDD            | 22472876  | 18,759      |
|                      | HYDRA-MDD1     | NA        | 33,540      |
|                      | HYDRA-MDD2     | NA        | 33,540      |
|                      | SCZ            | 23974872  | 11,244      |
|                      | HYDRA-SCZ1     | 32103250  | 14,786      |
|                      | HYDRA-SCZ2     | 32103250  | 14,786      |
| OCD                  | 28761083       | 9,725     |             |
| Cardiovascular       | WMH            | 31551276  | 11,226      |
|                      | AF             | 30061737  | 1030,836    |
|                      | Stroke         | 29531354  | 446,696     |
| Eye                  | Glaucoma       | 33627673  | 330,905     |
| Hepatic              | Liver fat      | 34128465  | 32,858      |
|                      | PBC            | 34033851  | 24,510      |
| Immune               | SLE            | 26502338  | 14,267      |
|                      | HIV            | 34737426  | 208,808     |
| Metabolic            | DB             | 30054458  | 655,666     |
|                      | Hyperlipidemia | 34906840  | 349,222     |
| Musculoskeletal      | RA             | 36333501  | 92,044      |
| Pulmonary            | Lung carcinoma | 28604730  | 85,716      |
| Renal                | CKD            | 31152163  | 625,219     |
| Digestive            | CD             | 26192919  | 20,883      |
|                      | IBD            | 26192919  | 34652       |
| Breast               | Breast cancer  | 29059683  | 139,274     |

|           |               |          |         |
|-----------|---------------|----------|---------|
|           | Education     | 23722424 | 126,559 |
| Cognition | Reaction time | 29844566 | 330,069 |
|           | Intelligence  | 28530673 | 78,308  |
| Lifestyle | Computer use  | 32317632 | 408,815 |

905

906



907 **Supplementary Table 5: Genetic correlations analyses between the nine BAGs and longevity,**  
 908 **household income, and telomere length.** We downloaded the GWAS summary statistics from  
 909 Deelen et al.<sup>19</sup>, which performed two GWASs on longevity based on the 90<sup>th</sup> survival percentile.  
 910 For the household income GWAS, we downloaded from Hill et al.<sup>20</sup>. For the telomere length, we  
 911 used GWAS summary statistics from Codd et al. .  
 912

| BAG                     | Trait            | $g_c$ mean | $g_c$ std | P                   | PubMed ID | Sample size |
|-------------------------|------------------|------------|-----------|---------------------|-----------|-------------|
| Brain_age_gap           |                  | gc_mean    | gc_std    | 0.0931              |           |             |
| Cardiovascular_age_gap  |                  | -0.1588    | 0.0946    | 0.0049              |           |             |
| Eye_age_gap             |                  | -0.2038    | 0.0725    | 0.0719              |           |             |
| Hepatic_age_gap         |                  | -0.1657    | 0.0921    | 0.6182              |           |             |
| Immune_age_gap          | Longevity        | 0.0495     | 0.0993    | 0.9299              | 31413236  | 36,745      |
| Metabolic_age_gap       |                  | 0.0086     | 0.0979    | 0.7605              |           |             |
| Musculoskeletal_age_gap |                  | 0.0328     | 0.1074    | 0.1128              |           |             |
| Pulmonary_age_gap       |                  | -0.1193    | 0.0752    | 0.0057              |           |             |
| Renal_age_gap           |                  | -0.197     | 0.0713    | 0.0323              |           |             |
| Brain_age_gap           |                  | -0.2089    | 0.0403    | 2.2E <sup>-07</sup> |           |             |
| Cardiovascular_age_gap  |                  | -0.0679    | 0.0356    | 0.0563              |           |             |
| Eye_age_gap             |                  | -0.066     | 0.0404    | 0.1024              |           |             |
| Hepatic_age_gap         | Household income | -0.1026    | 0.0417    | 0.0138              | 31874048  | 286,301     |
| Immune_age_gap          |                  | 0.0028     | 0.0414    | 0.9464              |           |             |
| Metabolic_age_gap       |                  | -0.0671    | 0.0389    | 0.0841              |           |             |
| Musculoskeletal_age_gap |                  | -0.2867    | 0.0308    | 1.4E <sup>-20</sup> |           |             |
| Pulmonary_age_gap       |                  | -0.1567    | 0.0286    | 4.4E <sup>-08</sup> |           |             |
| Renal_age_gap           |                  | -0.0989    | 0.0321    | 0.002               |           |             |
| Brain_age_gap           |                  | 0.0273     | 0.0506    | 0.5897              |           |             |
| Cardiovascular_age_gap  |                  | -0.0005    | 0.0038    | 0.9897              |           |             |
| Eye_age_gap             |                  | -0.0124    | 0.0439    | 0.7769              |           |             |
| Hepatic_age_gap         |                  | -0.0042    | 0.0306    | 0.9089              |           |             |
| Immune_age_gap          | Telomere length  | -0.1338    | 0.0377    | 0.0004              | 34611362  | 472,174     |
| Metabolic_age_gap       |                  | -0.0514    | 0.0393    | 0.1905              |           |             |
| Musculoskeletal_age_gap |                  | 0.0045     | 0.0333    | 0.8932              |           |             |
| Pulmonary_age_gap       |                  | -0.0993    | 0.0331    | 0.0027              |           |             |
| Renal_age_gap           |                  | -0.029     | 0.0293    | 0.3222              |           |             |

913

914 **Supplementary Table 6: Additional sensitivity checks for the causal relationships**  
 915 **A) GWAS without and with body weight as a covariate for the causal relationship from**  
 916 **the hepatic BAG to the musculoskeletal BAG.**

| Weight | Outcome (split2) | Exposure (split1) | Method                    | nSNP | BETA       | SE         | P          | OR         | CI_low     | CI_high    |
|--------|------------------|-------------------|---------------------------|------|------------|------------|------------|------------|------------|------------|
| N      | Musculoskeletal  | Hepatic           | MR Egger                  | 19   | 0.51783336 | 0.14070786 | 0.00185593 | 1.67838725 | 1.27385274 | 2.21138886 |
|        | Musculoskeletal  | Hepatic           | Weighted median           | 19   | 0.35295633 | 0.06606437 | 9.16E-08   | 1.42326899 | 1.25040832 | 1.62002649 |
|        | Musculoskeletal  | Hepatic           | Inverse variance weighted | 19   | 0.38344296 | 0.07834137 | 9.85E-07   | 1.46732785 | 1.25846664 | 1.71085295 |
|        | Musculoskeletal  | Hepatic           | Simple mode               | 19   | 0.15733154 | 0.10700058 | 0.15872332 | 1.17038357 | 0.94895908 | 1.44347395 |
|        | Musculoskeletal  | Hepatic           | Weighted mode             | 19   | 0.46614953 | 0.08121762 | 1.93E-05   | 1.59384531 | 1.35929067 | 1.86887391 |
| Y      | Musculoskeletal  | Hepatic           | MR Egger                  | 18   | 0.51517011 | 0.14245065 | 0.00231711 | 1.67392323 | 1.26613232 | 2.21305384 |
|        | Musculoskeletal  | Hepatic           | Weighted median           | 18   | 0.35613857 | 0.06002398 | 2.97E-09   | 1.42780539 | 1.26933301 | 1.60606258 |
|        | Musculoskeletal  | Hepatic           | Inverse variance weighted | 18   | 0.38926537 | 0.0792834  | 9.12E-07   | 1.47589615 | 1.2634801  | 1.72402356 |
|        | Musculoskeletal  | Hepatic           | Simple mode               | 18   | 0.24697399 | 0.11293776 | 0.04302518 | 1.28014581 | 1.02594689 | 1.59732761 |
|        | Musculoskeletal  | Hepatic           | Weighted mode             | 18   | 0.47542746 | 0.06925444 | 2.74E-06   | 1.60870171 | 1.40451037 | 1.84257891 |

917 **B) GWAS without and with body weight as a covariate for the causal relationship from**  
 918 **the musculoskeletal BAG to the hepatic BAG.**  
 919

| Weight | Outcome (split2) | Exposure (split1) | Method                    | nSNP | BETA       | SE         | P          | OR         | CI_low     | CI_high    |
|--------|------------------|-------------------|---------------------------|------|------------|------------|------------|------------|------------|------------|
| N      | Hepatic          | Musculoskeletal   | MR Egger                  | 9    | 1.8282501  | 0.24293965 | 0.00013439 | 6.22298749 | 3.8654897  | 10.0182839 |
|        | Hepatic          | Musculoskeletal   | Weighted median           | 9    | 0.92114305 | 0.13768954 | 2.23E-11   | 2.51216028 | 1.9179781  | 3.2904178  |
|        | Hepatic          | Musculoskeletal   | Inverse variance weighted | 9    | 1.02402966 | 0.18103365 | 1.54E-08   | 2.78439235 | 1.9526818  | 3.97035541 |
|        | Hepatic          | Musculoskeletal   | Simple mode               | 9    | 1.20577311 | 0.18620161 | 0.000193   | 3.33933976 | 2.31826245 | 4.81014995 |
|        | Hepatic          | Musculoskeletal   | Weighted mode             | 9    | 1.25833413 | 0.13034769 | 1.10E-05   | 3.51955347 | 2.7260472  | 4.54403601 |
| Y      | Hepatic          | Musculoskeletal   | MR Egger                  | 9    | 1.69092352 | 0.35916855 | 0.00218827 | 5.42448802 | 2.68304718 | 10.9670342 |
|        | Hepatic          | Musculoskeletal   | Weighted median           | 9    | 0.85408009 | 0.13197703 | 9.71E-11   | 2.34921232 | 1.81376558 | 3.04272978 |
|        | Hepatic          | Musculoskeletal   | Inverse variance weighted | 9    | 0.99179962 | 0.19767923 | 5.24E-07   | 2.69608204 | 1.83005923 | 3.97192521 |
|        | Hepatic          | Musculoskeletal   | Simple mode               | 9    | 1.23665687 | 0.15851732 | 5.23E-05   | 3.44408019 | 2.52429777 | 4.6990052  |
|        | Hepatic          | Musculoskeletal   | Weighted mode             | 9    | 1.27628794 | 0.15385858 | 3.36E-05   | 3.58331353 | 2.65043899 | 4.84453174 |

920 **C) GWAS without and with rs429358 as an IV for the causal relationship from the**  
 921 **hepatic BAG to the musculoskeletal BAG.**  
 922

| rs429358 | Outcome (split2) | Exposure (split1) | Method                                    | nSNP | BETA       | SE         | P          | OR         | CI_low     | CI_high    |
|----------|------------------|-------------------|-------------------------------------------|------|------------|------------|------------|------------|------------|------------|
| N        | Musculoskeletal  | Hepatic           | MR Egger                                  | 18   | 0.51522659 | 0.12736616 | 0.00093844 | 1.67401778 | 1.30419881 | 2.14870271 |
|          | Musculoskeletal  | Hepatic           | Weighted median Inverse variance weighted | 18   | 0.36478773 | 0.06339608 | 8.71E-09   | 1.44020827 | 1.27192489 | 1.63075657 |
|          | Musculoskeletal  | Hepatic           | Simple mode                               | 18   | 0.41660503 | 0.07146014 | 5.55E-09   | 1.51680335 | 1.31856385 | 1.74484706 |
|          | Musculoskeletal  | Hepatic           | Weighted mode                             | 18   | 0.15924454 | 0.09710274 | 0.11938508 | 1.17262466 | 0.96940109 | 1.41845167 |
|          | Musculoskeletal  | Hepatic           | Weighted mode                             | 18   | 0.45942325 | 0.07899932 | 2.07E-05   | 1.58316063 | 1.35606155 | 1.84829191 |
| Y        | Musculoskeletal  | Hepatic           | MR Egger                                  | 19   | 0.51783336 | 0.14070786 | 0.00185593 | 1.67838725 | 1.27385274 | 2.21138886 |
|          | Musculoskeletal  | Hepatic           | Weighted median Inverse variance weighted | 19   | 0.35295633 | 0.06606437 | 9.16E-08   | 1.42326899 | 1.25040832 | 1.62002649 |
|          | Musculoskeletal  | Hepatic           | Simple mode                               | 19   | 0.38344296 | 0.07834137 | 9.85E-07   | 1.46732785 | 1.25846664 | 1.71085295 |
|          | Musculoskeletal  | Hepatic           | Weighted mode                             | 19   | 0.15733154 | 0.10700058 | 0.15872332 | 1.17038357 | 0.94895908 | 1.44347395 |
|          | Musculoskeletal  | Hepatic           | Weighted mode                             | 19   | 0.46614953 | 0.08121762 | 1.93E-05   | 1.59384531 | 1.35929067 | 1.86887391 |

923  
924  
925  
926  
927  
928

D) **Causal analysis using the LCV method.** We performed causal analysis using the LCV method for the bi-directional causality between hepatic and musculoskeletal BAGs, the 9 BAGs and longevity, and the 9 BAGs and telomere length. GCP: genetic causality proportion.

| Trait1                  | Trait2                                  | GCP      | GCP_se   | P               | PubMed ID | Sample size |
|-------------------------|-----------------------------------------|----------|----------|-----------------|-----------|-------------|
| Musculoskeletal_age_gap | Hepatic_age_gap                         | -0.75144 | 0.143475 | 9.37E-12        | NA        | 111,543     |
| Brain_age_gap           | Longevity (99 <sup>th</sup> percentile) | -0.45597 | 0.208644 | <b>0.047488</b> | 31874048  | 286,301     |
| Cardiovascular_age_gap  |                                         | -0.21694 | 0.395088 | 0.547241        |           |             |
| Eye_age_gap             |                                         | -0.07761 | 0.565366 | 0.639544        |           |             |
| Hepatic_age_gap         |                                         | -0.53253 | 0.321599 | 0.089042        |           |             |
| Immune_age_gap          |                                         | -0.15001 | 0.356513 | 0.868225        |           |             |
| Musculoskeletal_age_gap |                                         | -0.26633 | 0.440294 | 0.827824        |           |             |
| Metabolic_age_gap       |                                         | -0.3153  | 0.391594 | 0.866896        |           |             |
| Pulmonary_age_gap       |                                         | -0.18056 | 0.375253 | 0.210053        |           |             |
| Renal_age_gap           |                                         | -0.33425 | 0.403767 | 0.573389        |           |             |
| Brain_age_gap           | Telomere length                         | -0.05796 | 0.55584  | 0.713688        | 34611362  | 472,174     |
| Cardiovascular_age_gap  |                                         | -0.32007 | 0.294362 | 0.421771        |           |             |
| Eye_age_gap             |                                         | -0.11877 | 0.49709  | 0.926991        |           |             |
| Hepatic_age_gap         |                                         | -0.00755 | 0.332263 | 0.792948        |           |             |
| Immune_age_gap          |                                         | -0.3321  | 0.126005 | <b>0.002502</b> |           |             |
| Metabolic_age_gap       |                                         | -0.07943 | 0.45872  | 0.705827        |           |             |
| Musculoskeletal_age_gap |                                         | -0.15992 | 0.478106 | 0.821179        |           |             |
| Pulmonary_age_gap       |                                         | -0.67193 | 0.198345 | <b>3.57E-16</b> |           |             |
| Renal_age_gap           |                                         | -0.17496 | 0.500093 | 0.6767          |           |             |

929

930 **Supplementary Table 7: Selected 17 clinical traits for Mendelian randomization analyses.**  
 931 We unbiasedly and systematically selected 17 clinical traits, including chronic diseases affecting  
 932 multiple organ systems, cognition, and lifestyle factors. The selection procedure is detailed in the  
 933 main text (**Method 2J**).  
 934

| Primary organ system | Trait                        | PubMed ID | IEU-ID (If applicable) | Number of IVs (forward MR) |
|----------------------|------------------------------|-----------|------------------------|----------------------------|
| Brain                | AD                           | 24162737  | ebi-a-GCST002245       | 10                         |
|                      | BIP                          | 31043756  | ieu-a-1126             | 12                         |
| Metabolic            | Type 2 diabetes              | 22885922  | ieu-a-26               | 10                         |
|                      | Triglyceride-to-lipid ratio  | 32114887  | XL VLDL TG pct         | 41                         |
| Eye                  | Glaucoma                     | NA        | finn-b-H7 GLAUCOMA     | 9                          |
| Musculoskeletal      | RA                           | 23143596  | ebi-a-GCST005569       | 11                         |
| Hepatic              | PBC                          | 26394269  | ebi-a-GCST003129       | 16                         |
| Digestive            | CD                           | 26192919  | ieu-a-12               | 77                         |
|                      | IBD                          | 23128233  | ieu-a-292              | 81                         |
| Breast               | Breast cancer                | 29059683  | ieu-a-1126             | 86                         |
| Cognition            | Reaction time                | NA        | Local-UKBB             | 18                         |
|                      | Coffee intake                | NA        | Local-UKBB             | 11                         |
| Lifestyle            | Fresh fruit                  | NA        | Local-UKBB             | 15                         |
|                      | Tea intake                   | NA        | Local-UKBB             | 12                         |
|                      | Sleep duration               | NA        | Local-UKBB             | 8                          |
|                      | Summer outdoor activity hour | NA        | Local-UKBB             | 14                         |
|                      | Body weight                  | NA        | Local-UKBB             | 161                        |

935  
 936  
 937

## 938 **Supplementary References**

- 939 1. Elliott, L. T. *et al.* Genome-wide association studies of brain imaging phenotypes in UK  
940 Biobank. *Nature* **562**, 210–216 (2018).
- 941 2. Kurki, M. I. *et al.* FinnGen provides genetic insights from a well-phenotyped isolated  
942 population. *Nature* **613**, 508–518 (2023).
- 943 3. Giambartolomei, C. *et al.* Bayesian Test for Colocalisation between Pairs of Genetic  
944 Association Studies Using Summary Statistics. *PLOS Genetics* **10**, e1004383 (2014).
- 945 4. Mummery, C. J. *et al.* Tau-targeting antisense oligonucleotide MAPTRx in mild Alzheimer’s  
946 disease: a phase 1b, randomized, placebo-controlled trial. *Nat Med* 1–11 (2023)  
947 doi:10.1038/s41591-023-02326-3.
- 948 5. Wen, J. *et al.* The genetic architecture of multimodal human brain age. *Nat Commun* **15**, 2604  
949 (2024).
- 950 6. Wen, J. *et al.* Genomic loci influence patterns of structural covariance in the human brain.  
951 *Proceedings of the National Academy of Sciences* **120**, e2300842120 (2023).
- 952 7. Zhao, B. *et al.* Common variants contribute to intrinsic human brain functional networks. *Nat*  
953 *Genet* **54**, 508–517 (2022).
- 954 8. Zhao, B. *et al.* Common genetic variation influencing human white matter microstructure.  
955 *Science* **372**, (2021).
- 956 9. Zhao, B. *et al.* Genome-wide association analysis of 19,629 individuals identifies variants  
957 influencing regional brain volumes and refines their genetic co-architecture with cognitive and  
958 mental health traits. *Nat Genet* **51**, 1637–1644 (2019).
- 959 10. Bowden, J. *et al.* A framework for the investigation of pleiotropy in two-sample summary  
960 data Mendelian randomization. *Stat Med* **36**, 1783–1802 (2017).

- 961 11. Burgess, S. & Thompson, S. G. Interpreting findings from Mendelian randomization  
962 using the MR-Egger method. *Eur J Epidemiol* **32**, 377–389 (2017).
- 963 12. Chang, C.-C. & Lin, C.-J. LIBSVM: A library for support vector machines. *ACM Trans.*  
964 *Intell. Syst. Technol.* **2**, 1–27 (2011).
- 965 13. Tian, Y. E. *et al.* Heterogeneous aging across multiple organ systems and prediction of  
966 chronic disease and mortality. *Nat Med* 1–11 (2023) doi:10.1038/s41591-023-02296-6.
- 967 14. Cole, J. H., Marioni, R. E., Harris, S. E. & Deary, I. J. Brain age and other bodily ‘ages’:  
968 implications for neuropsychiatry. *Mol Psychiatry* **24**, 266–281 (2019).
- 969 15. Jones, D. T., Lee, J. & Topol, E. J. Digitising brain age. *The Lancet* **400**, 988 (2022).
- 970 16. Peng, H., Gong, W., Beckmann, C. F., Vedaldi, A. & Smith, S. M. Accurate brain age  
971 prediction with lightweight deep neural networks. *Medical Image Analysis* **68**, 101871 (2021).
- 972 17. Bashyam, V. M. *et al.* MRI signatures of brain age and disease over the lifespan based on  
973 a deep brain network and 14 468 individuals worldwide. *Brain* **143**, 2312–2324 (2020).
- 974 18. Wen, J. *et al.* Novel genomic loci and pathways influence patterns of structural  
975 covariance in the human brain. 2022.07.20.22277727 Preprint at  
976 <https://doi.org/10.1101/2022.07.20.22277727> (2022).
- 977 19. Deelen, J. *et al.* A meta-analysis of genome-wide association studies identifies multiple  
978 longevity genes. *Nat Commun* **10**, 3669 (2019).
- 979 20. Hill, W. D. *et al.* Genome-wide analysis identifies molecular systems and 149 genetic  
980 loci associated with income. *Nat Commun* **10**, 5741 (2019).
- 981 21. Codd, V. *et al.* Polygenic basis and biomedical consequences of telomere length  
982 variation. *Nat Genet* **53**, 1425–1433 (2021).
- 983
